# Supplementary material for: Synthesis and antimalarial evaluation of amide and urea derivatives based on the thiaplakortone A natural product scaffold
Source: Royal Society of Chemistry journal article supplement (doi:10.1039/c4ob01849d), 2014-11-26
Supplement: c4ob01849d1.pdf [file c4ob01849d1.pdf]

# Synthesis and Antimalarial Evaluation of Amide and Urea Derivatives Based on the Thiaplakortone A Natural Product Scaffold

Brett D. Schwartz,<sup>a</sup> Tina S. Skinner-Adams,<sup>a</sup> Katherine T. Andrews,<sup>a</sup> Mark J. Coster,<sup>a</sup> Michael D. Edstein,<sup>b</sup> Donna MacKenzie,<sup>b</sup> Susan A. Charman,<sup>c</sup> Maria Koltun,<sup>c</sup> Scott Blundell,<sup>c</sup> Anna Campbell,<sup>c</sup> Rebecca H. Pouwer,<sup>a</sup> Ronald J. Quinn,<sup>a</sup> Karren D. Beattie,<sup>a</sup> Peter C. Healy,<sup>a</sup> and Rohan A. Davis<sup>a,\*</sup>

<sup>a</sup> Eskitis Institute for Drug Discovery, Griffith University, Brisbane, QLD 4111, Australia. Tel. +61-7-3735-6043. E-mail: [r.davis@griffith.edu.au](mailto:r.davis@griffith.edu.au)

<sup>b</sup> Australian Army Malaria Institute, Brisbane, QLD 4051, Australia.

<sup>c</sup> Centre for Drug Candidate Optimisation, Monash University, 381 Royal Parade, Parkville, VIC 3052, Australia.

| Contents                                                                                                                                            | Page  |
|-----------------------------------------------------------------------------------------------------------------------------------------------------|-------|
| General Experimental Procedures                                                                                                                     | S2    |
| Chart of Analogues                                                                                                                                  | S3-4  |
| <sup>1</sup> H and selected <sup>13</sup> C NMR spectra of amides ( <b>8–32</b> , <b>40–45</b> ) and ureas ( <b>33</b> , <b>34</b> , <b>36–39</b> ) | S5-55 |
| X-ray structure data for Thiaplakortone A ( <b>1</b> ) and <i>n</i> -Propyl Amide Analogue ( <b>9</b> )                                             | S56   |

**General Experimental Procedures.** Unless otherwise specified, proton  $^1\text{H}$  and carbon  $^{13}\text{C}$  NMR spectra were recorded at 30 °C in DMSO- $d_6$  on Varian INOVA 500 or 600 MHz NMR spectrometers. The latter spectrometer was equipped with a triple resonance cold probe. The  $^1\text{H}$  and  $^{13}\text{C}$  NMR chemical shifts were referenced to the solvent peak for DMSO- $d_6$  at  $\delta_{\text{H}}$  2.50 and  $\delta_{\text{C}}$  39.5. LRESIMS were recorded on an Agilent 6120 quadrupole LCMS system.  $^1\text{H}$  NMR data are recorded as follows: chemical shift (d) [multiplicity, coupling constant(s)  $J$  (Hz), relative integral] where multiplicity is defined as: s = singlet; d = doublet; t = triplet; q = quartet; m = multiplet or combinations of the above. Compounds for biological studies were placed under high vacuum (0.05 mmHg) for several hours before testing.

Chart of Analogues (pg 1)

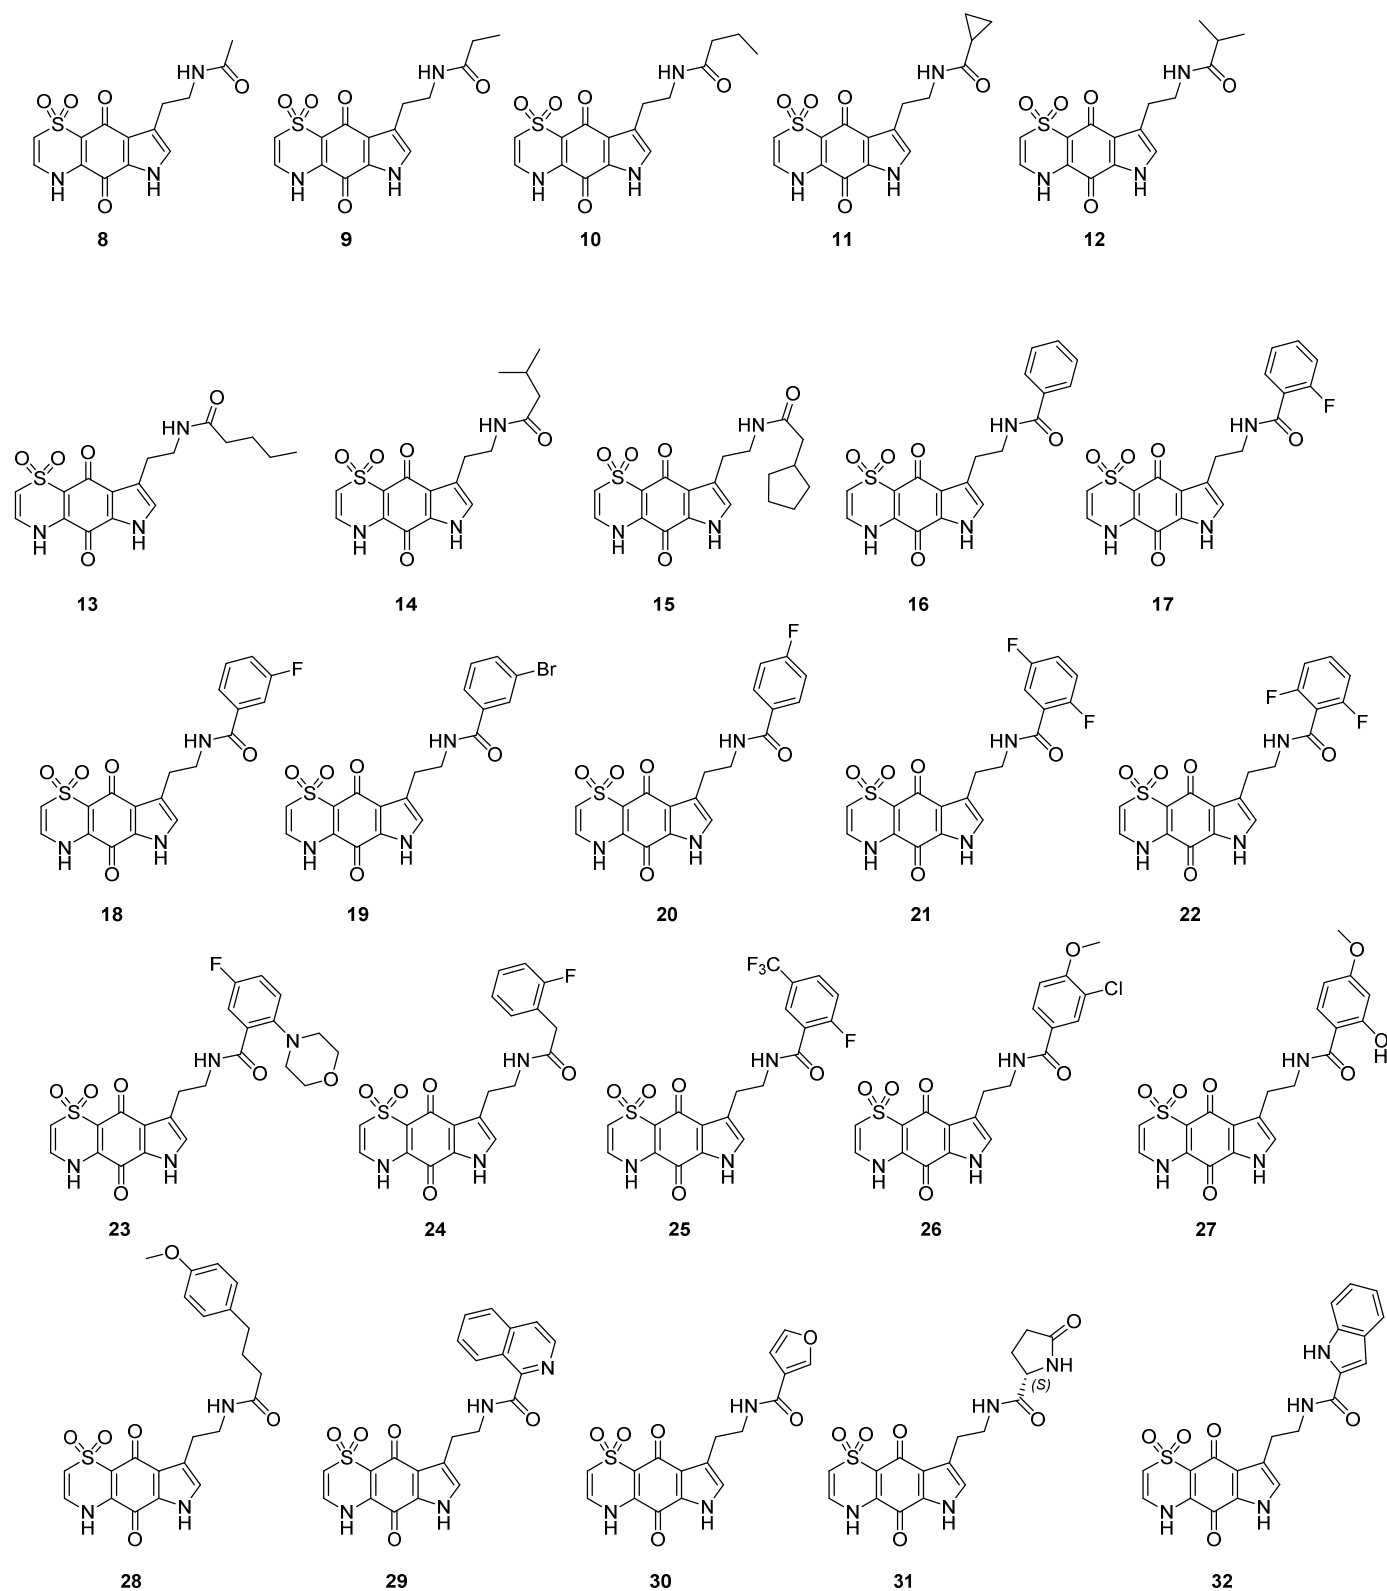

Chart of Analogues (pg 2)

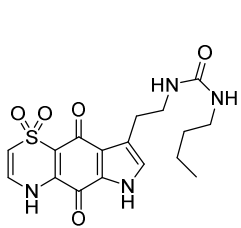

33

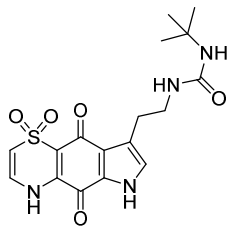

34

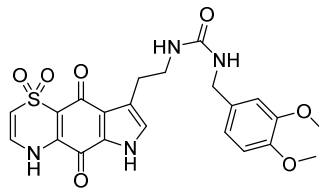

36

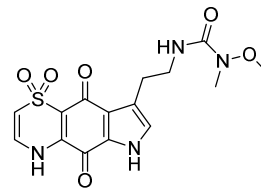

37

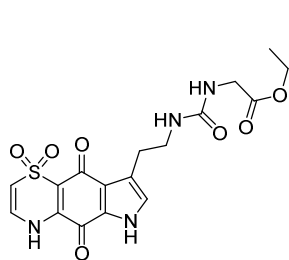

38

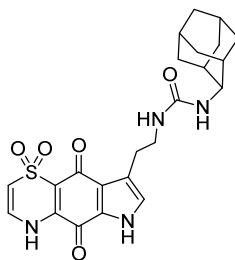

39

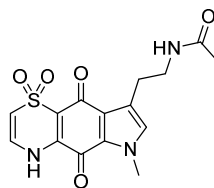

40

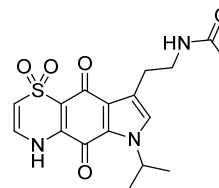

41

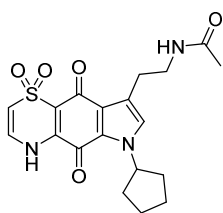

42

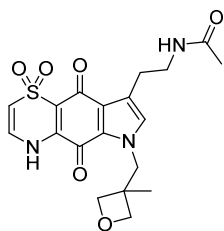

43

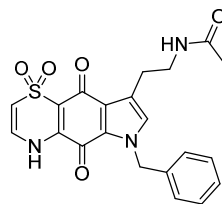

44

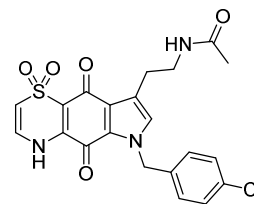

45

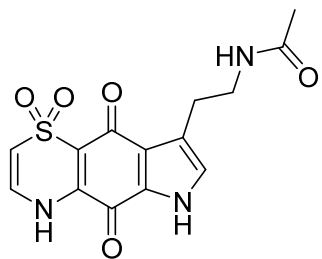

7.87  
7.86  
7.85  
7.29  
7.06  
7.04  
6.42  
6.41

3.29  
3.28  
3.26  
3.25  
2.84  
2.82  
2.81  
2.50

1.78

500 MHz  $^1\text{H}$  NMR spectrum of compound **8** in DMSO- $\text{d}_6$

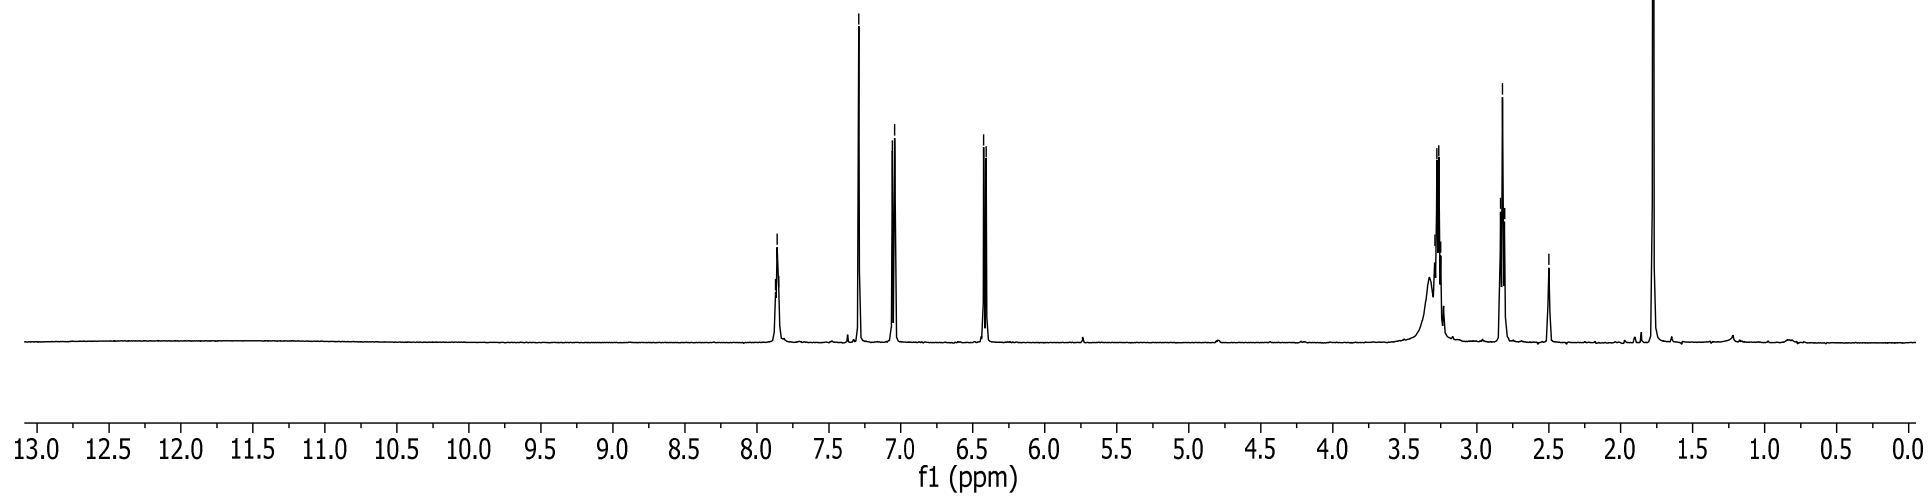

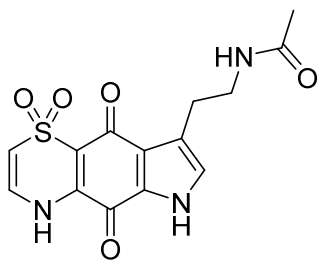

— 178.41

— 169.03

— 167.54

— 139.92

— 130.14

— 128.79

— 127.71

— 124.62

— 123.25

— 114.21

— 111.53

— 39.50

— 38.42

— 25.33

— 22.57

125 MHz  $^{13}\text{C}$  NMR spectrum of compound **8** in DMSO- $\text{d}_6$

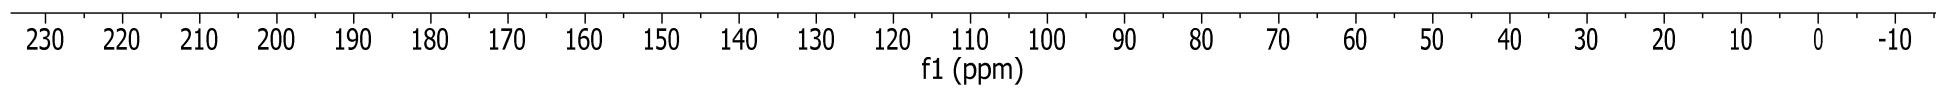

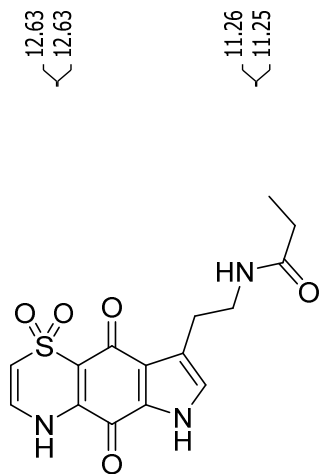

500 MHz  $^1\text{H}$  NMR spectrum of compound **9** in  $\text{DMSO-d}_6$

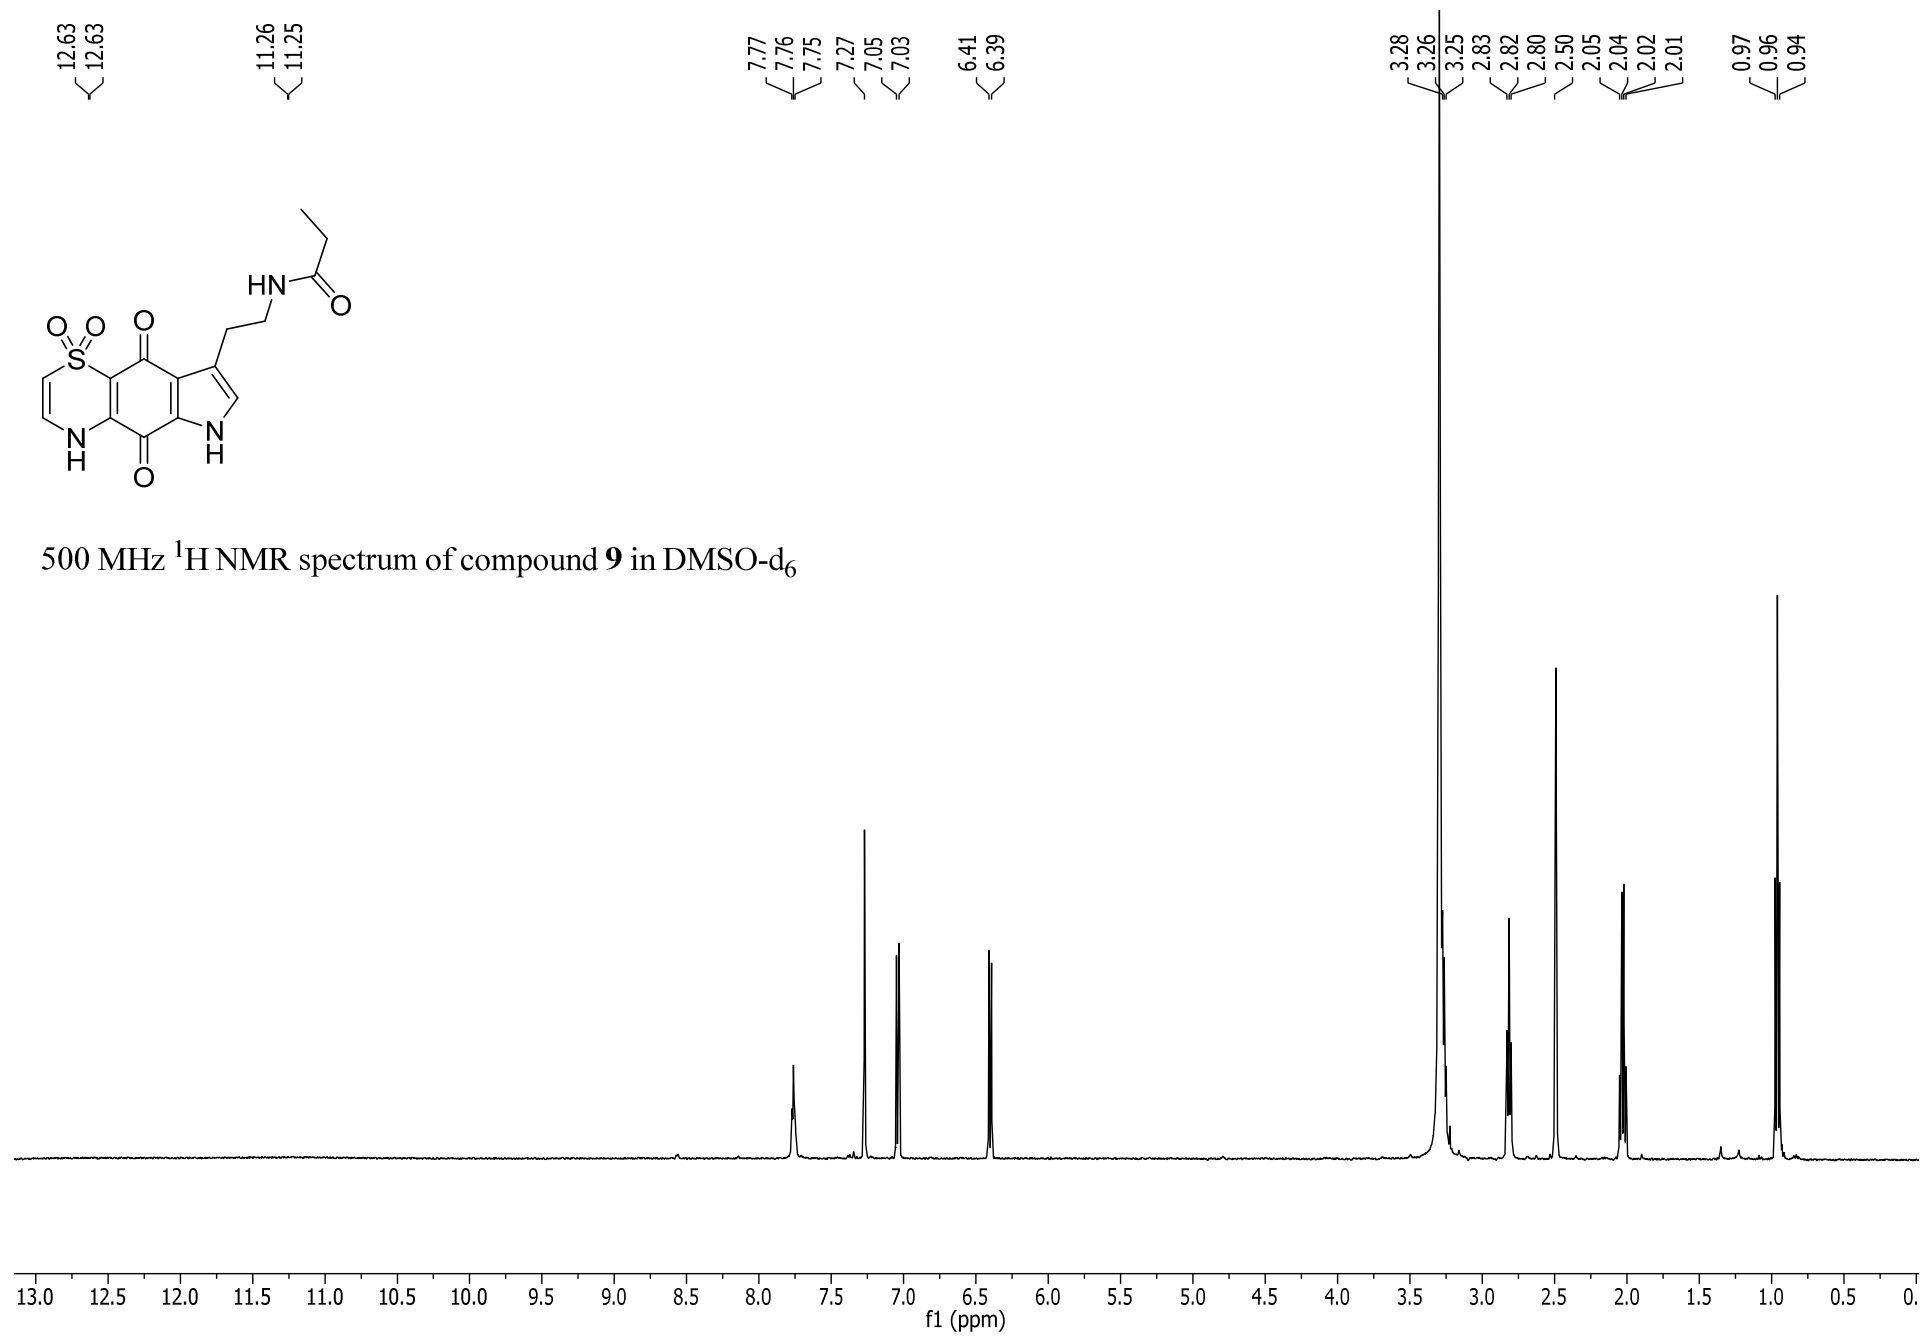

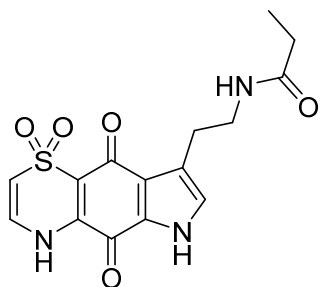

178.41  
172.69  
167.66

140.13  
130.35  
128.74  
127.74  
124.56  
123.25  
114.15  
111.51

38.30

28.45  
25.33

9.91

125 MHz  $^{13}\text{C}$  NMR spectrum of compound **9** in DMSO- $d_6$

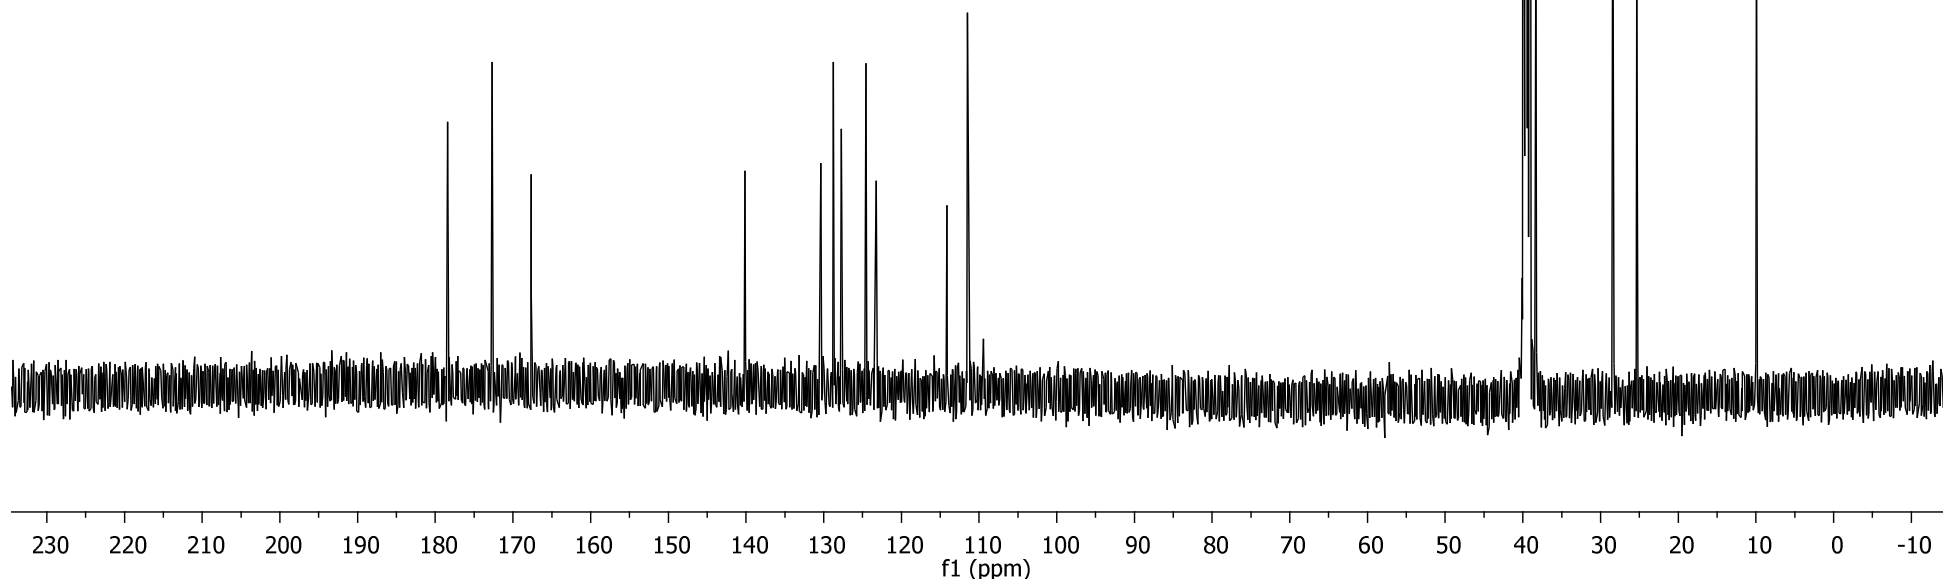



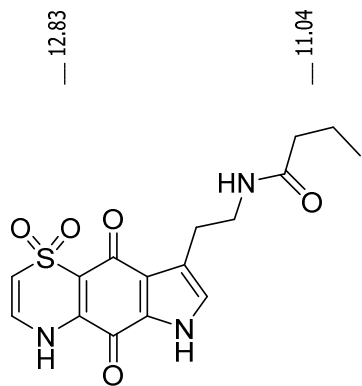

500 MHz  $^1\text{H}$  NMR spectrum of compound **10** in  $\text{DMSO-d}_6$

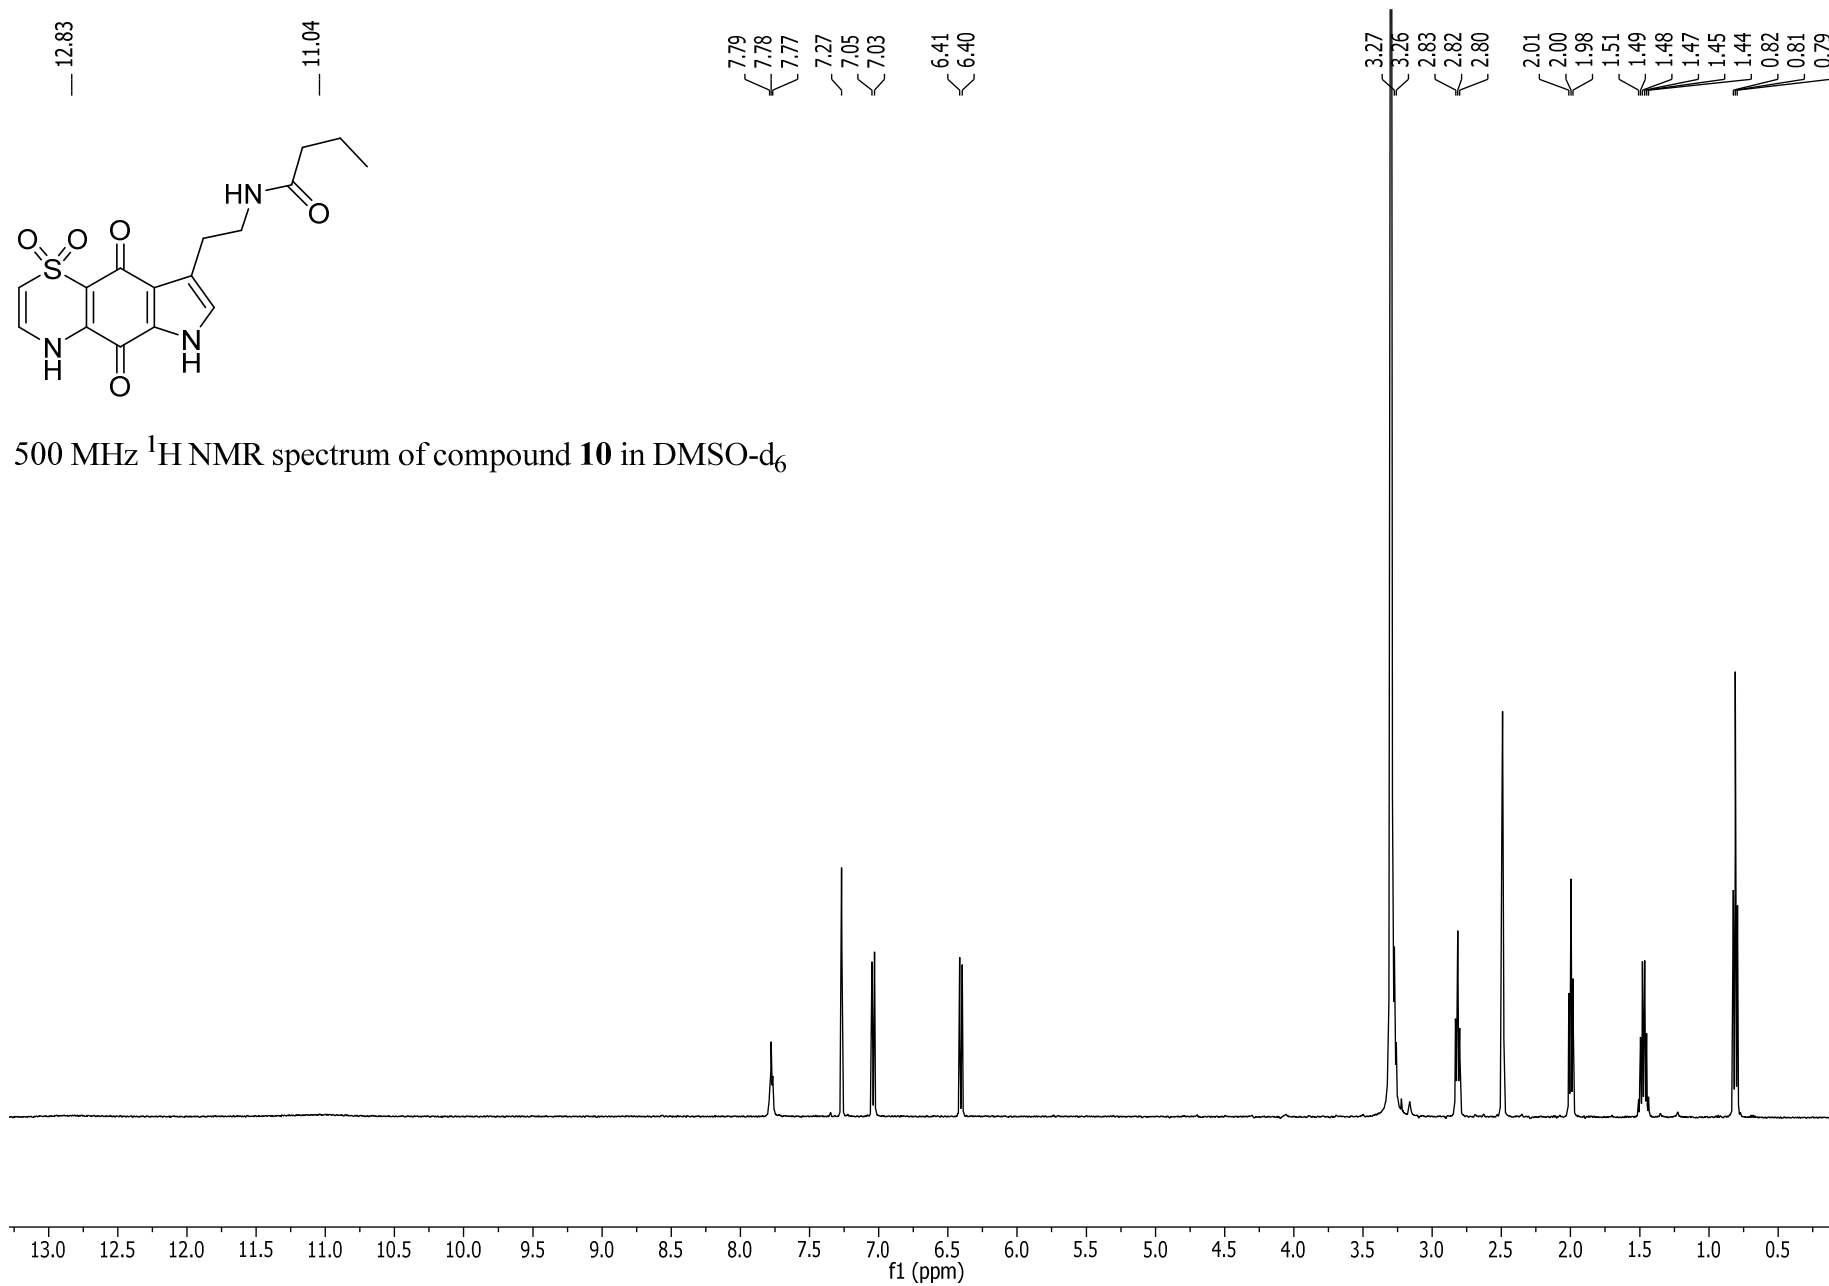

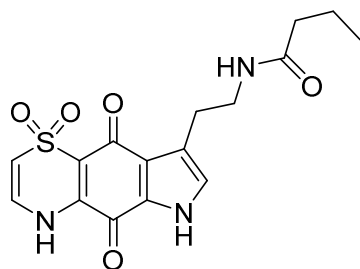

125MHz  $^{13}\text{C}$  NMR spectrum of compound **10** in DMSO- $\text{d}_6$

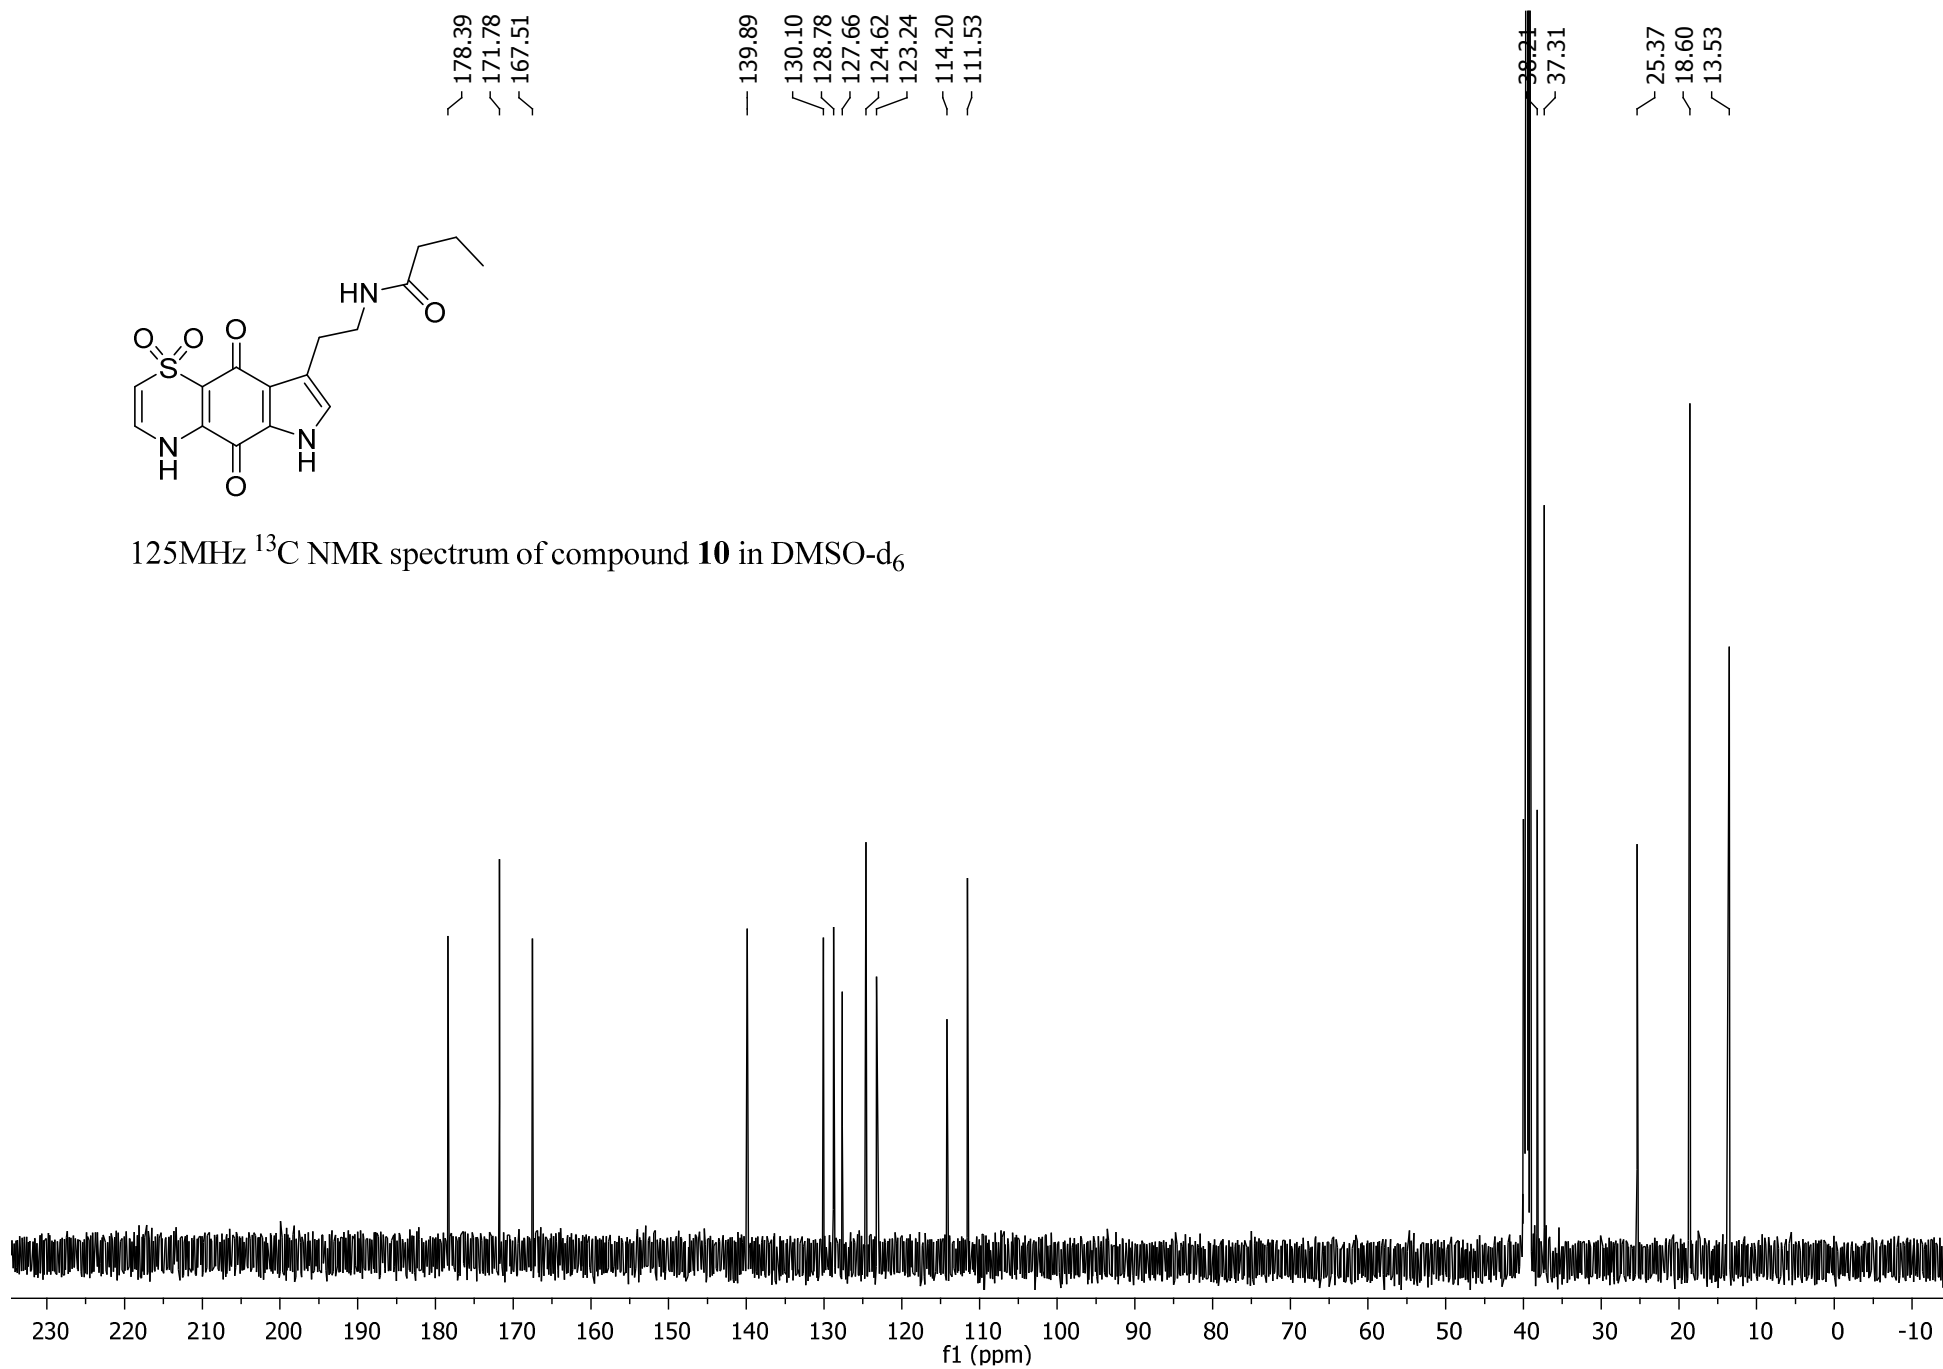

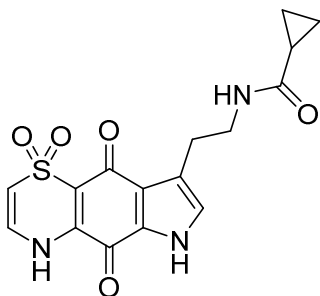

500 MHz  $^1\text{H}$  NMR spectrum of compound **11** in  $\text{DMSO-d}_6$

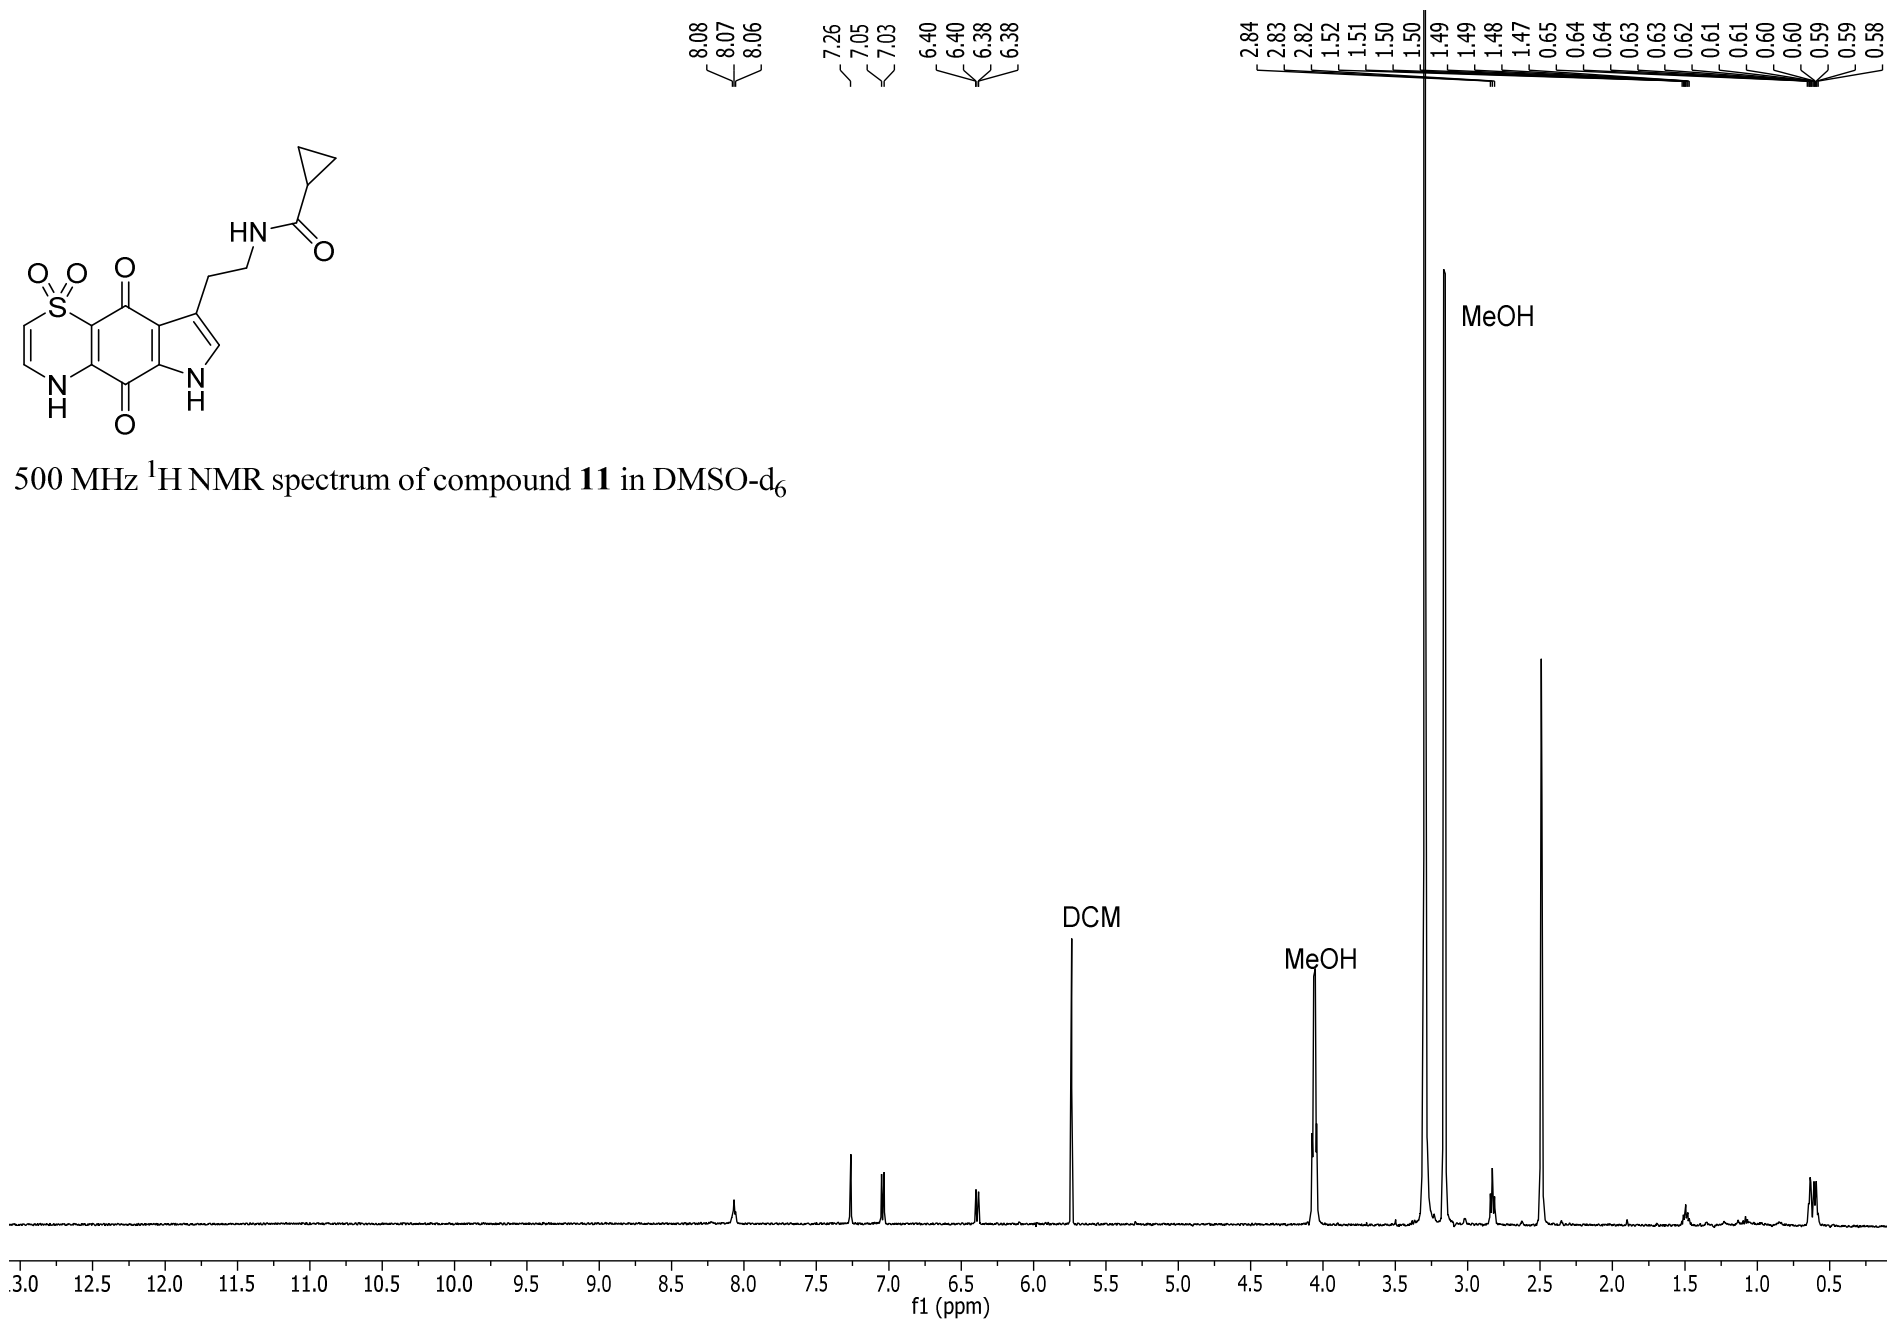

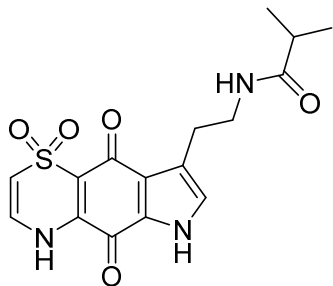

500 MHz  $^1\text{H}$  NMR spectrum of compound **12** in  $\text{DMSO-d}_6$

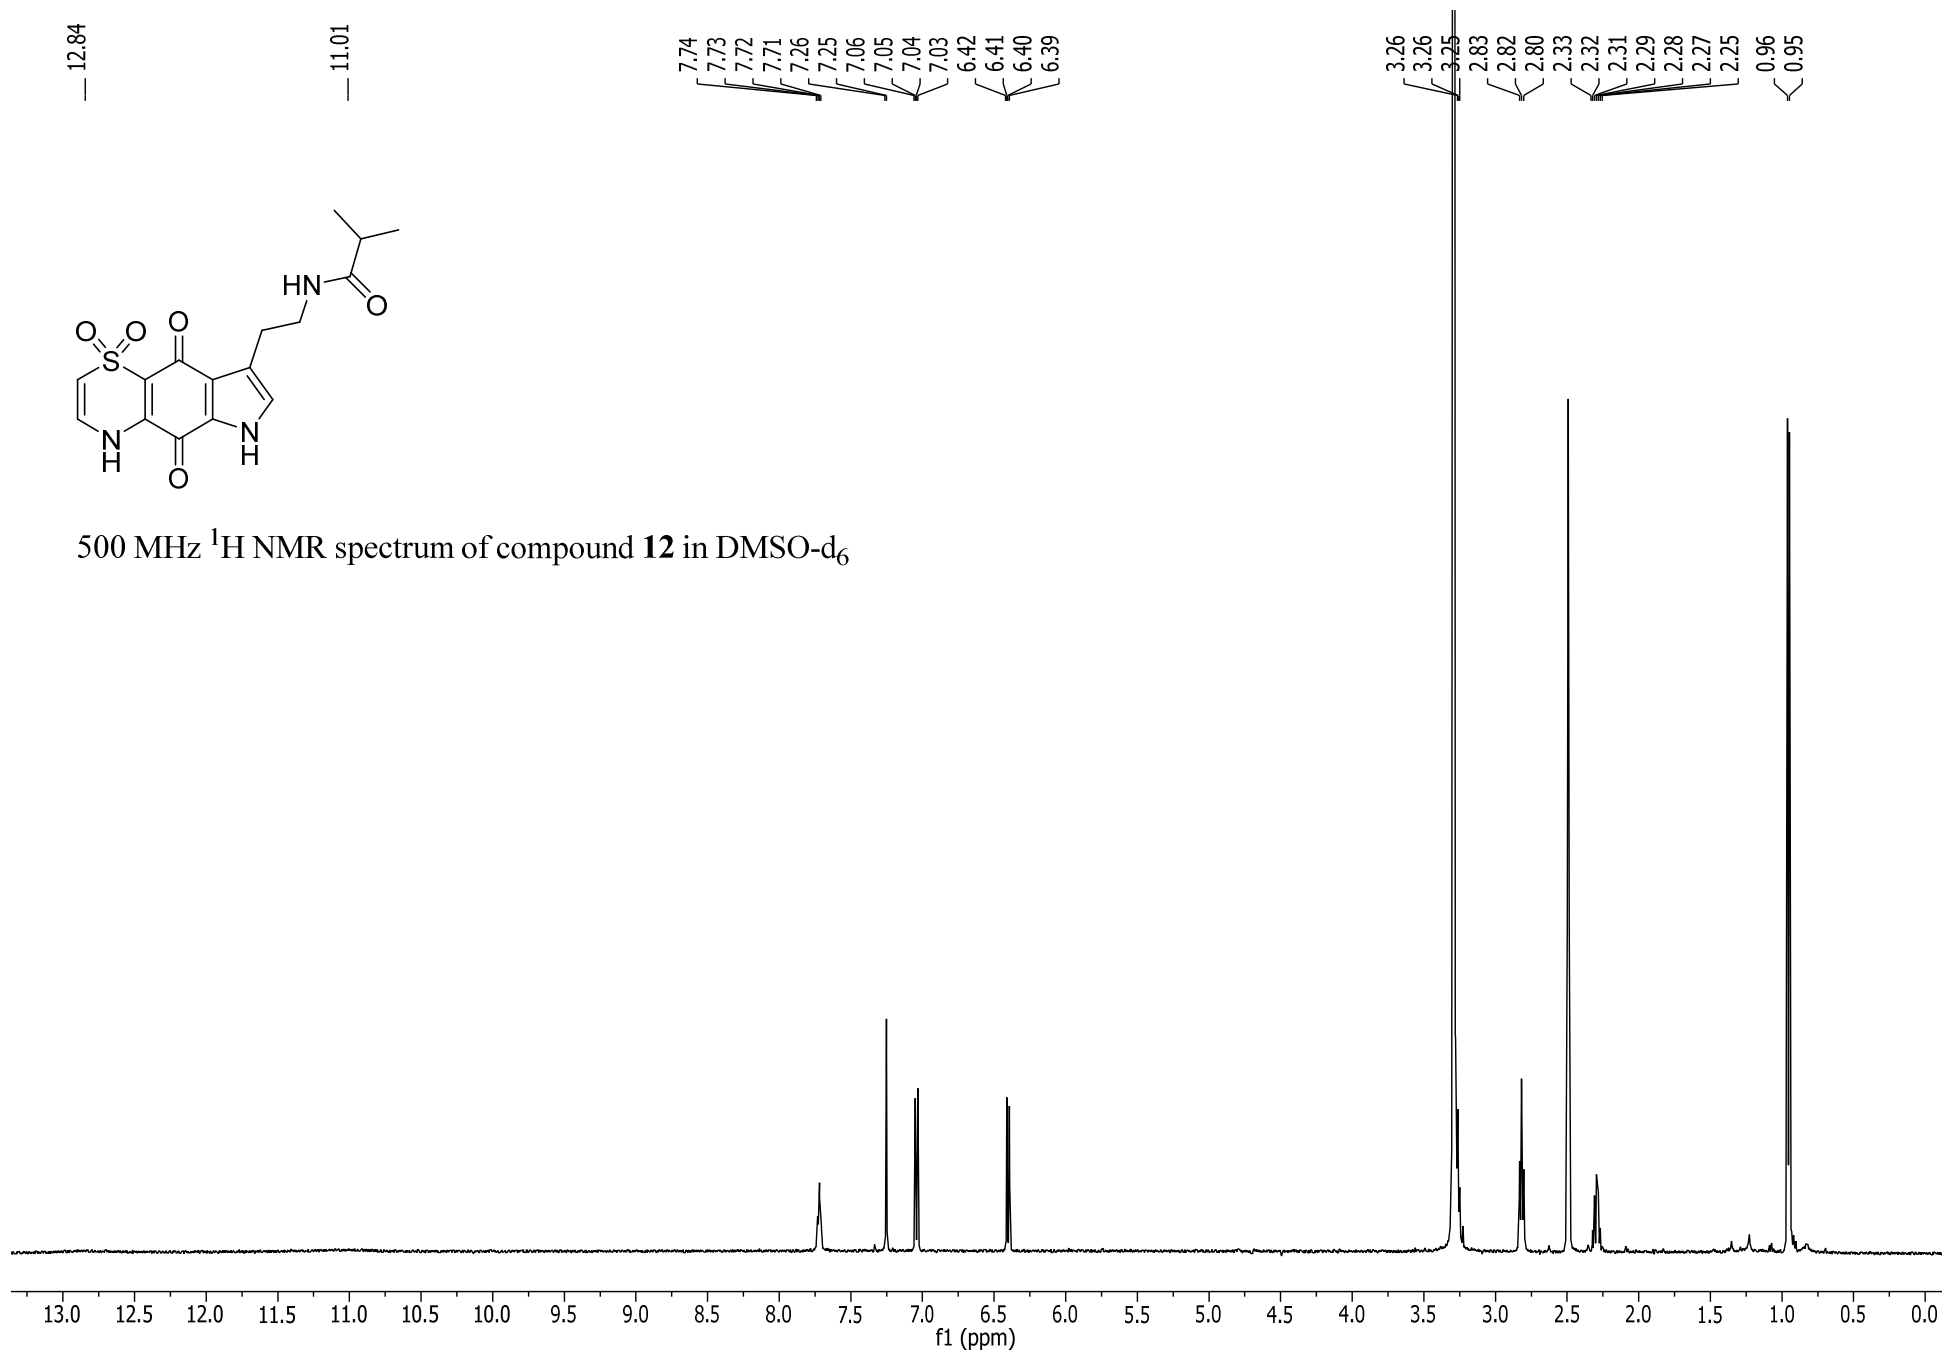

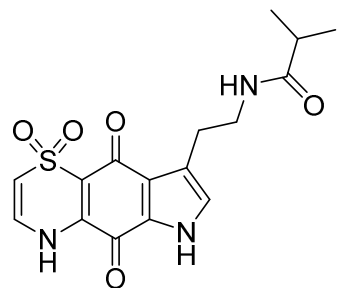

125 MHz  $^{13}\text{C}$  NMR spectrum of compound **12** in  $\text{DMSO-d}_6$

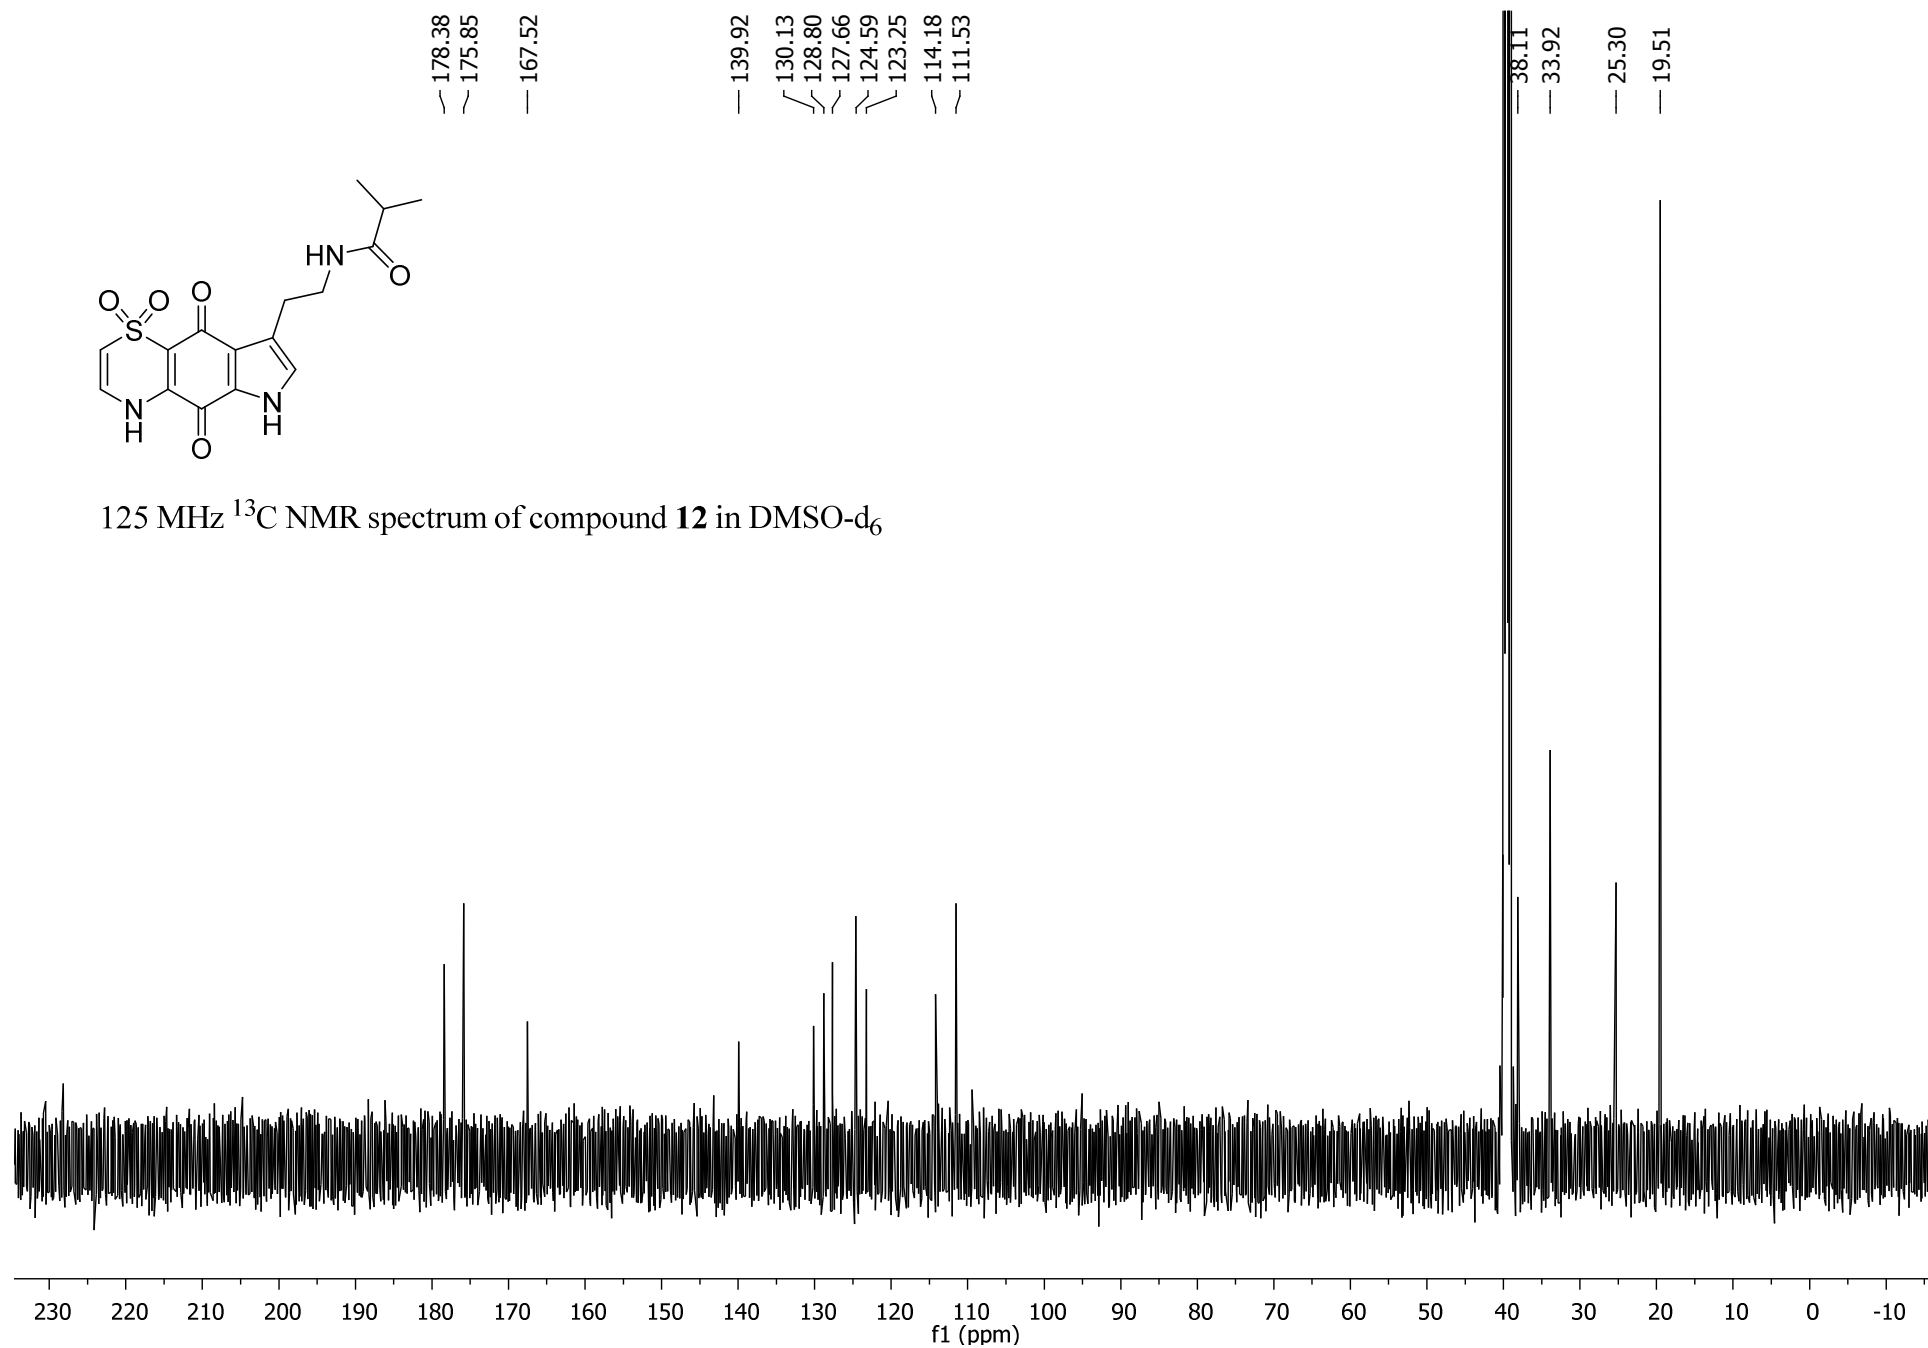

12.90  
12.89

11.06  
11.06

7.79  
7.79  
7.78  
7.78  
7.77  
7.76  
7.27  
7.27  
7.06  
7.05  
7.04  
7.03  
6.42  
6.42  
6.41  
6.40

3.31  
3.28  
3.27  
3.26  
2.83  
2.81  
2.80  
2.03  
2.02  
2.00  
1.46  
1.45  
1.43  
1.42  
1.40  
1.24  
1.23  
1.21  
1.20  
1.18  
1.17  
0.84  
0.83  
0.81

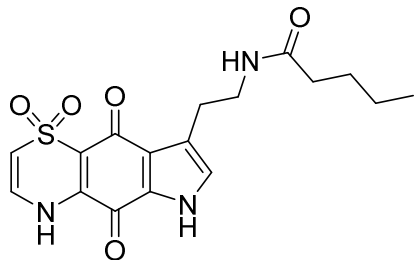

500 MHz  $^1\text{H}$  NMR spectrum of compound **13** in  $\text{DMSO-d}_6$

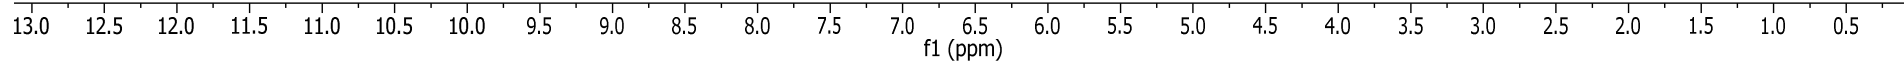

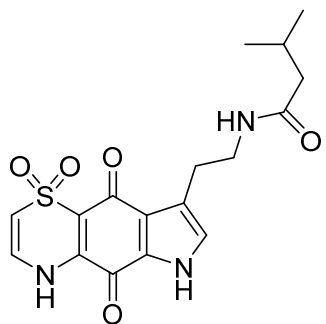

500 MHz  $^1\text{H}$  NMR spectrum of compound **14** in  $\text{DMSO-d}_6$

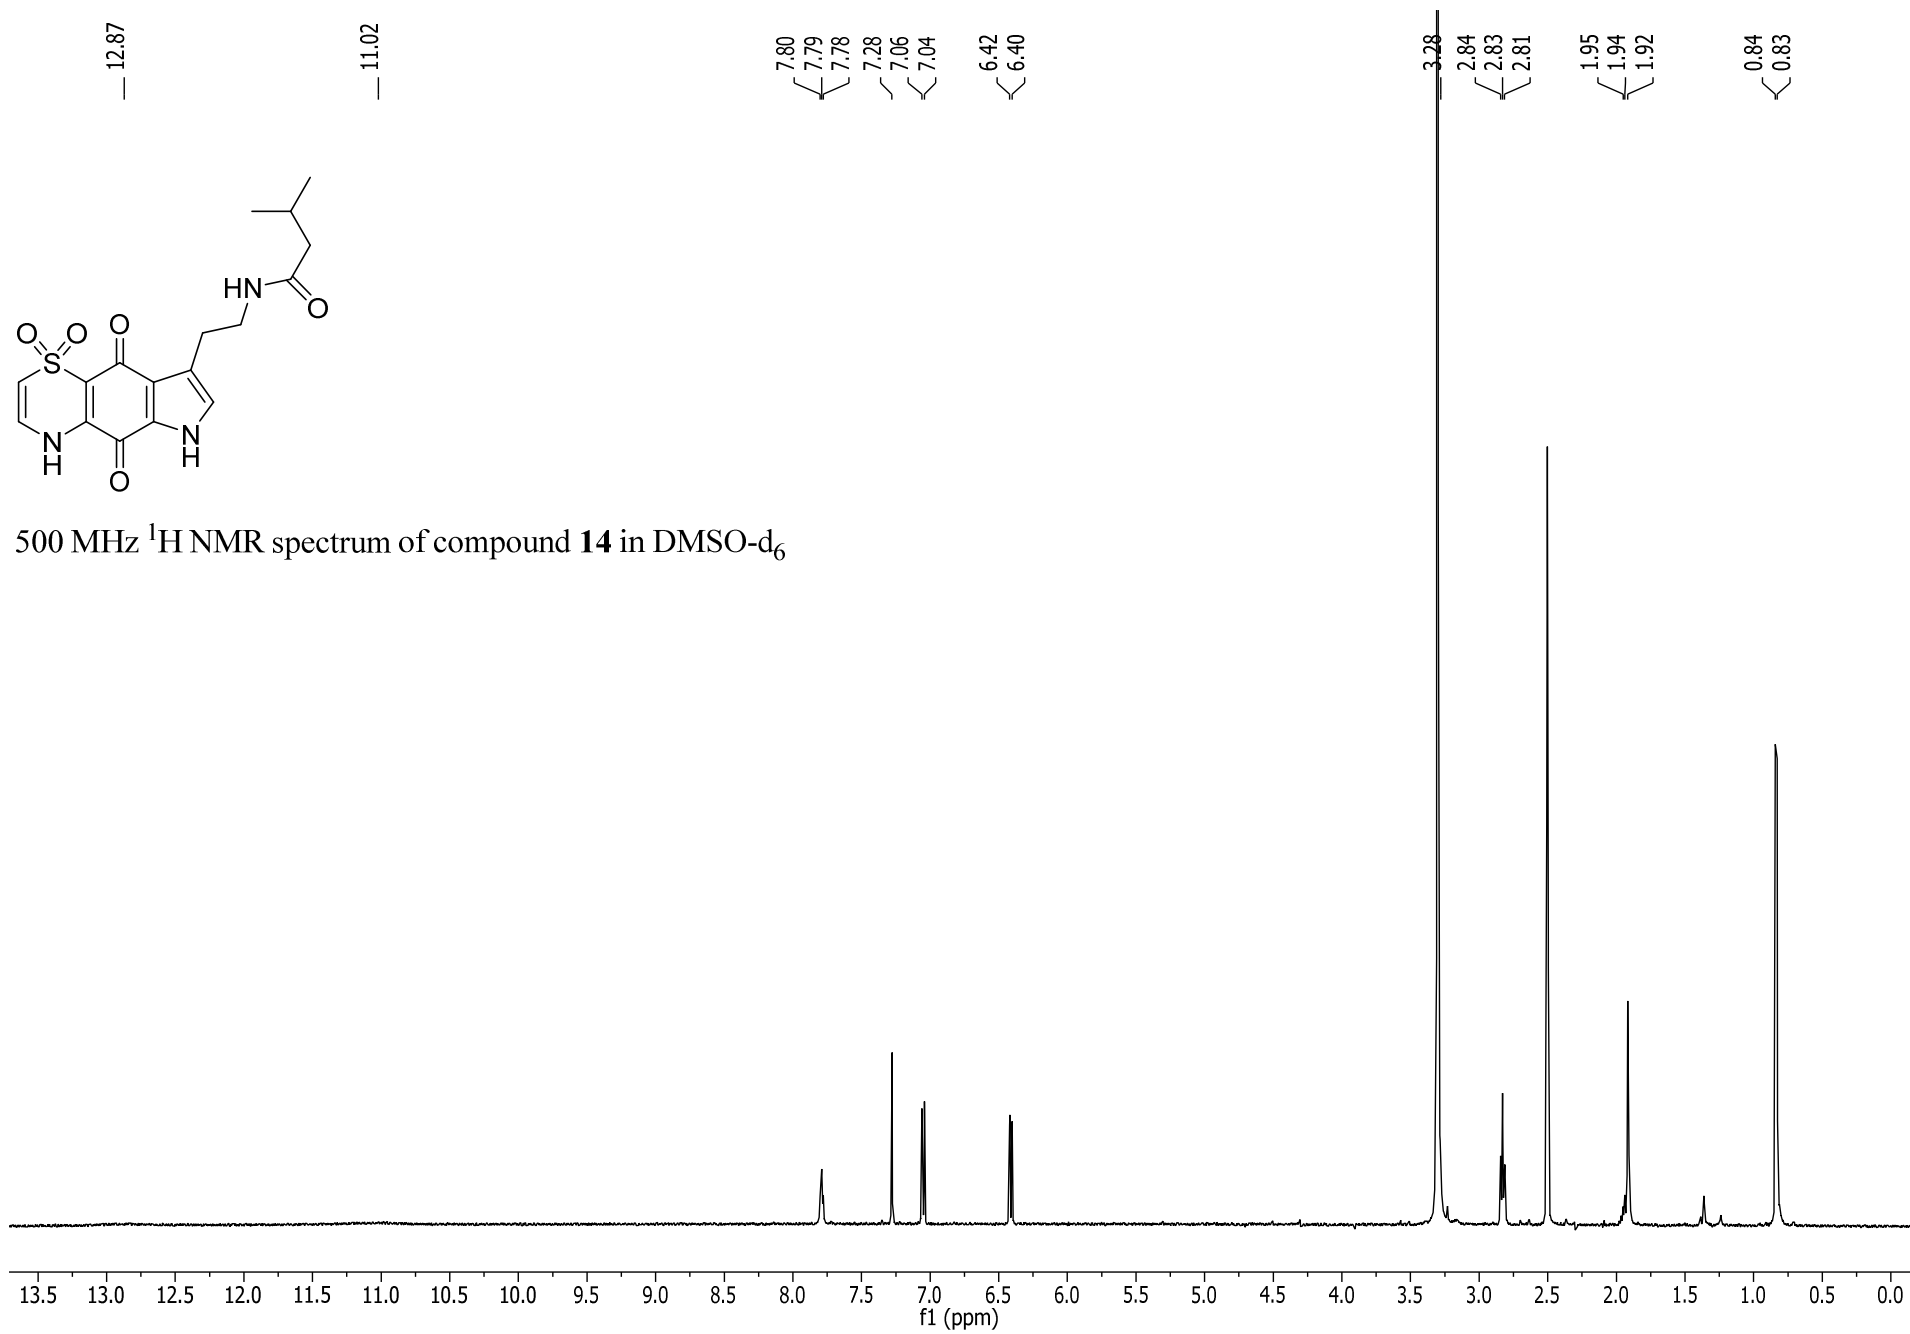

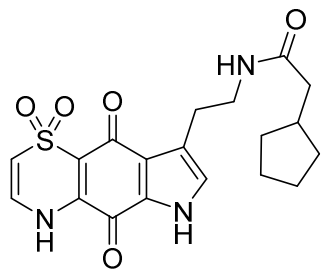

500 MHz  $^1\text{H}$  NMR spectrum of compound **15** in  $\text{DMSO-d}_6$

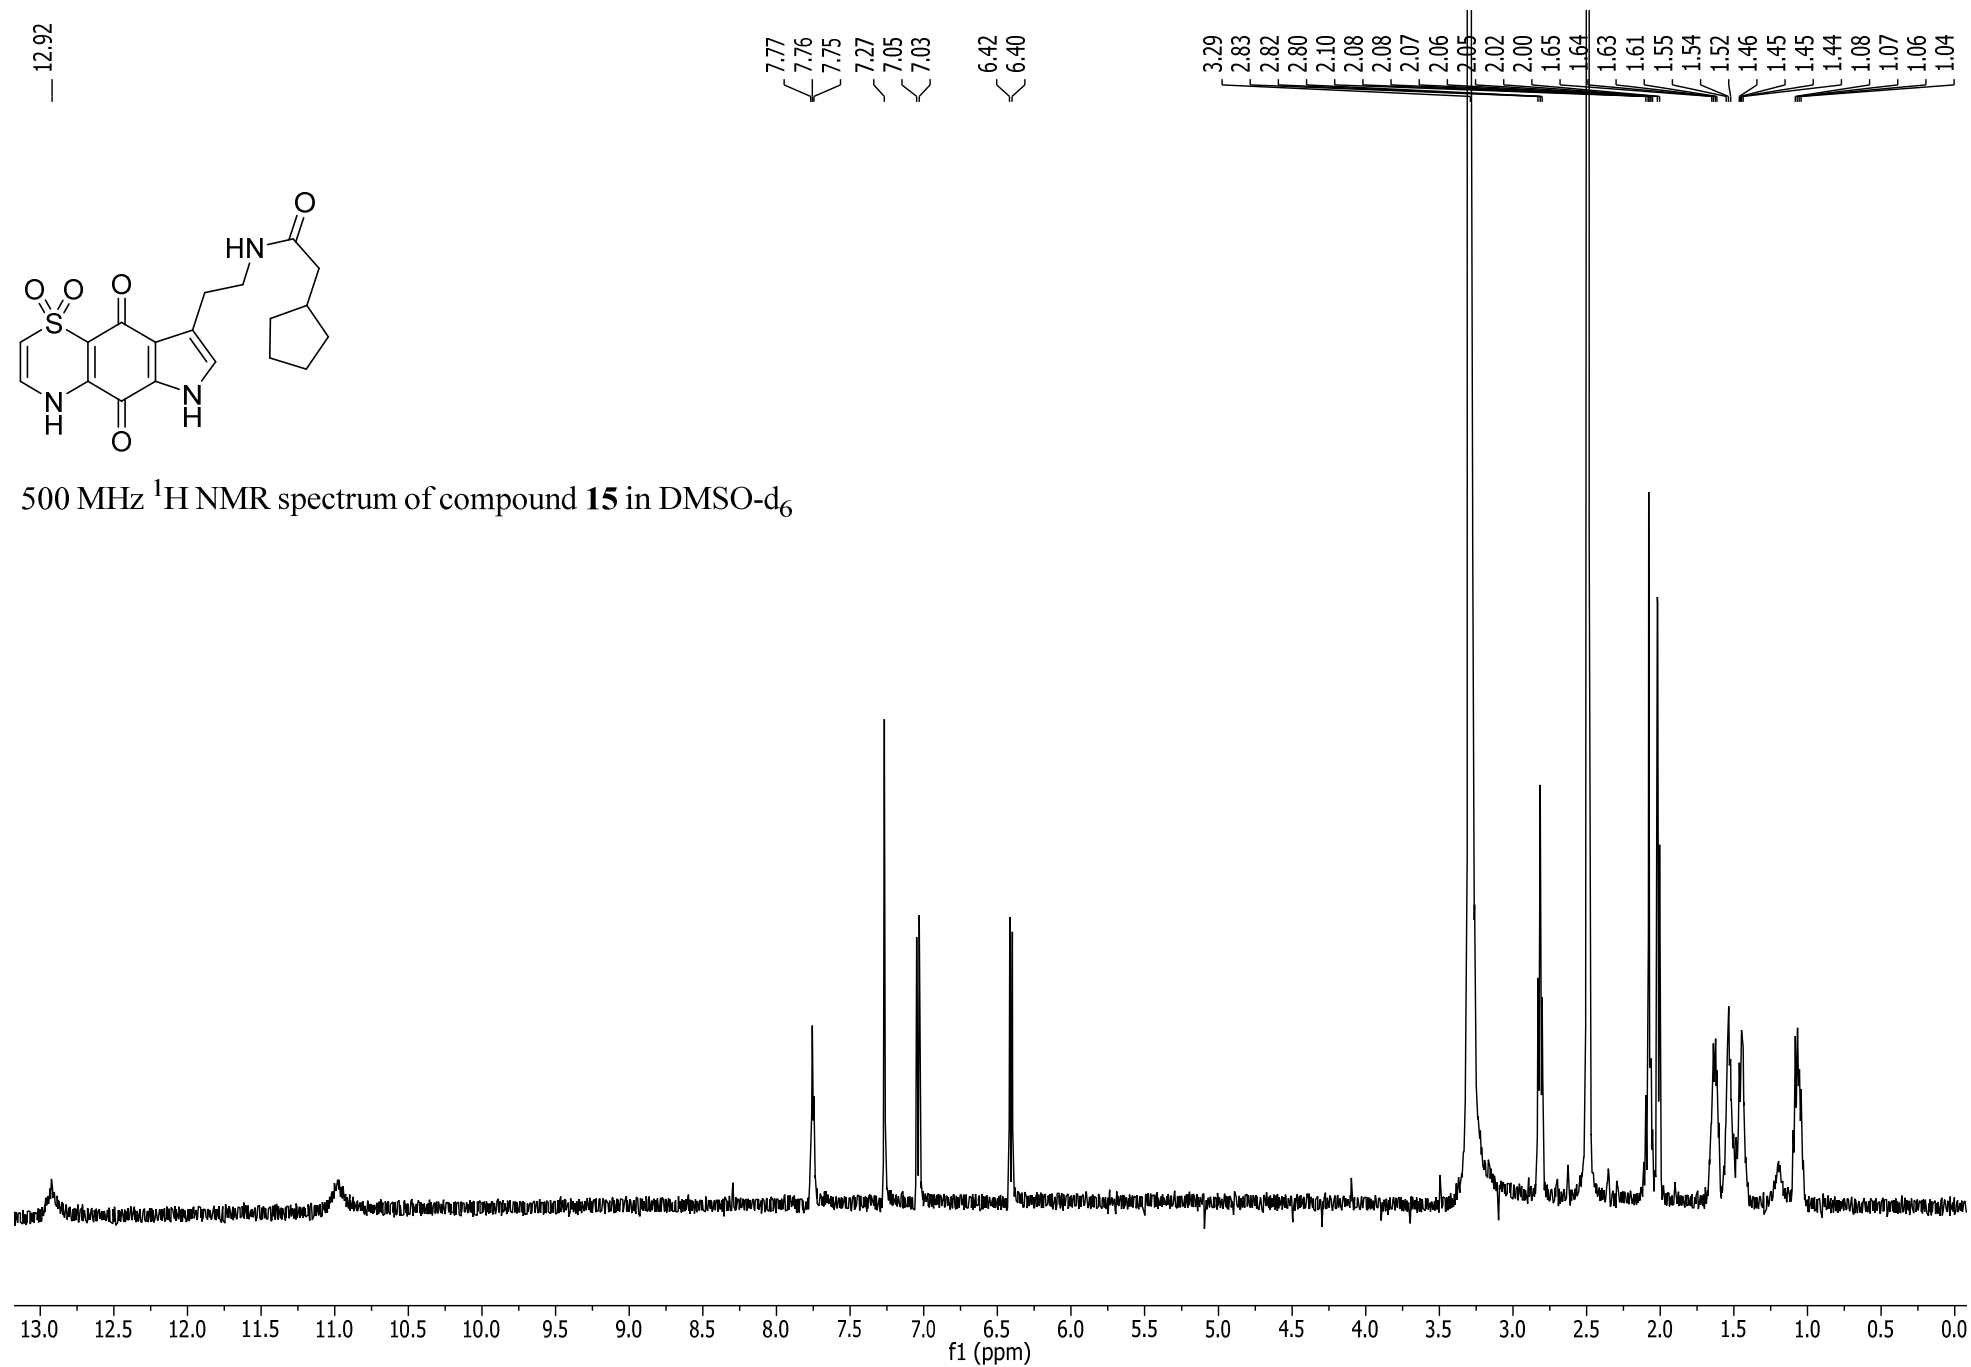



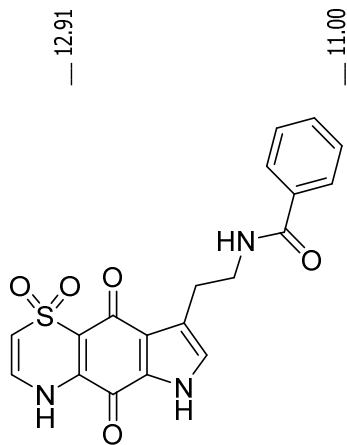

500 MHz  $^1\text{H}$  NMR spectrum of compound **16** in  $\text{DMSO-d}_6$

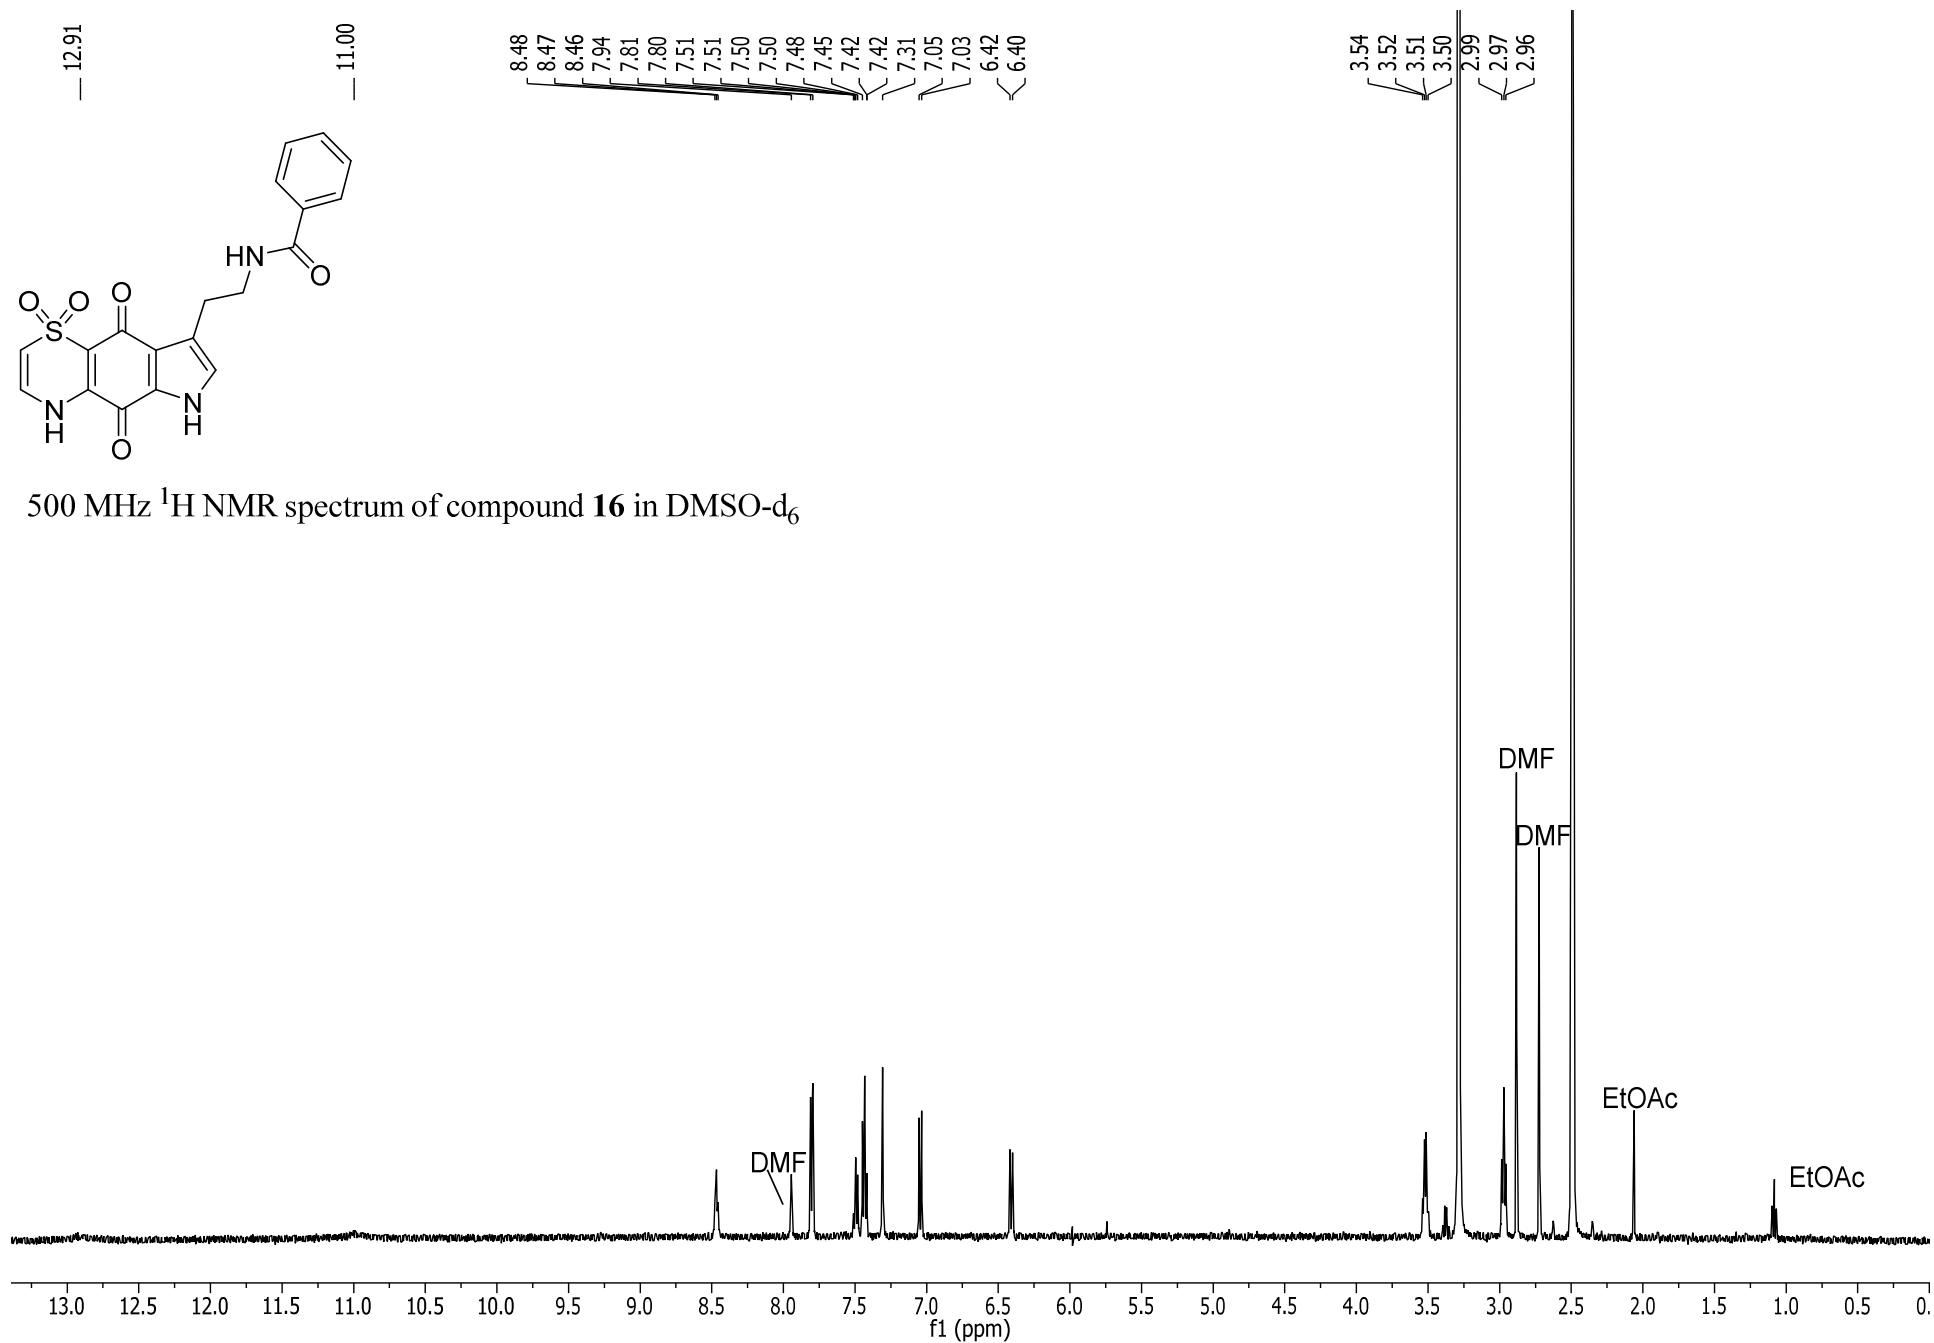

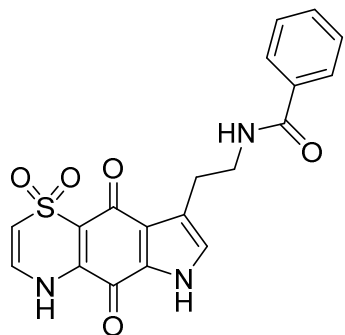

125 MHz  $^{13}\text{C}$  NMR spectrum  
of compound **16** in  $\text{DMSO-d}_6$

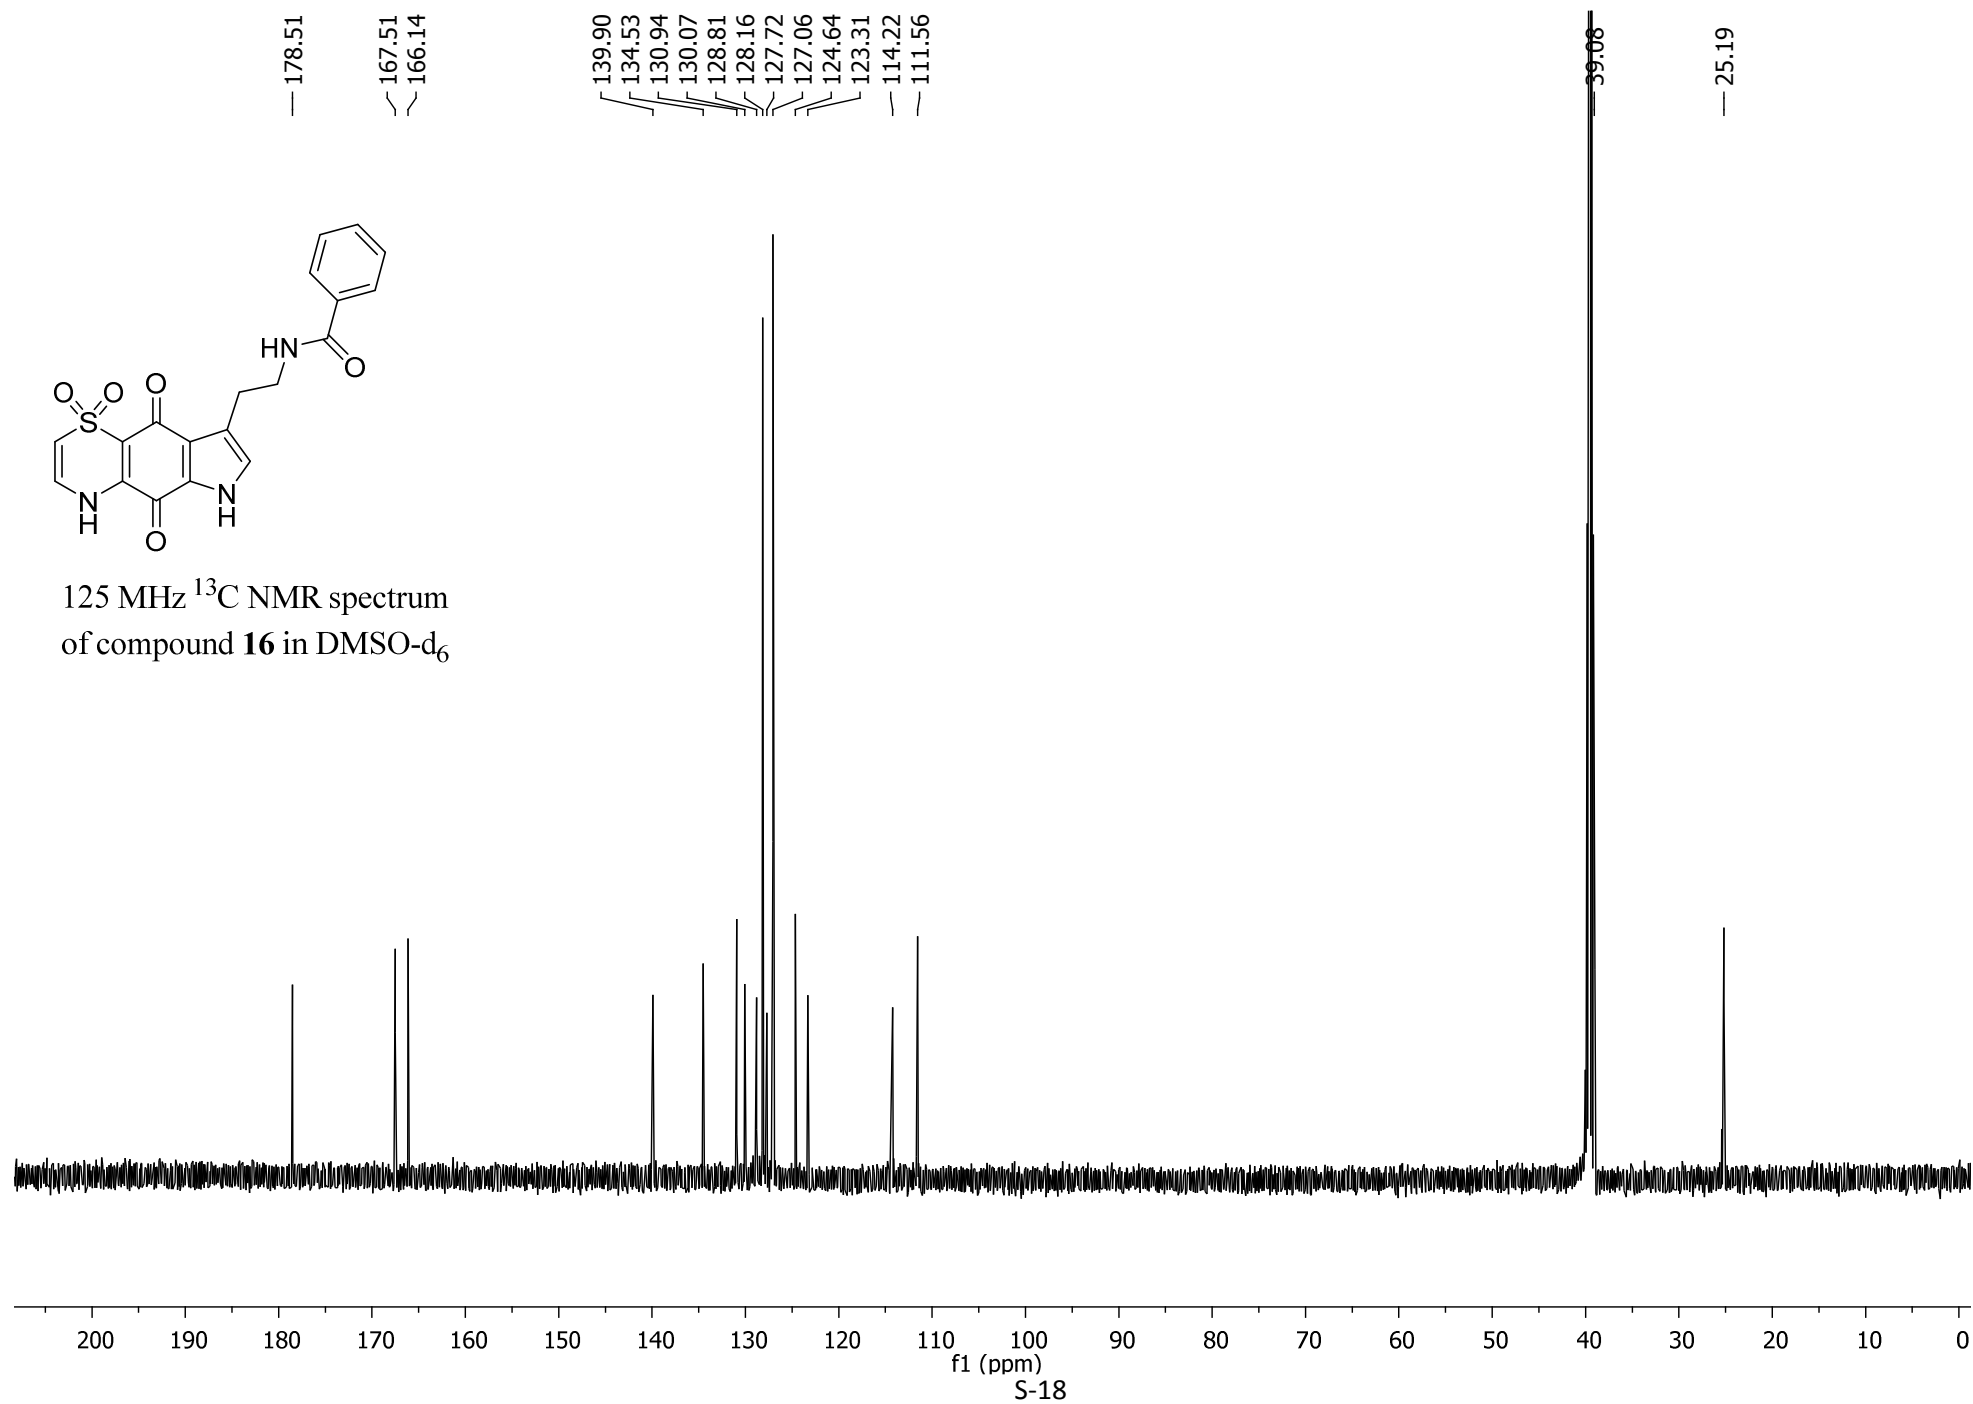

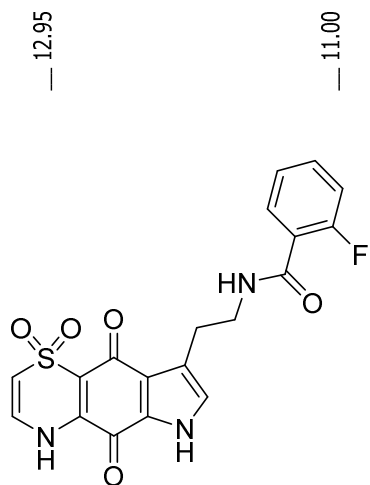

500 MHz  $^1\text{H}$  NMR spectrum of compound **17** in  $\text{DMSO-d}_6$

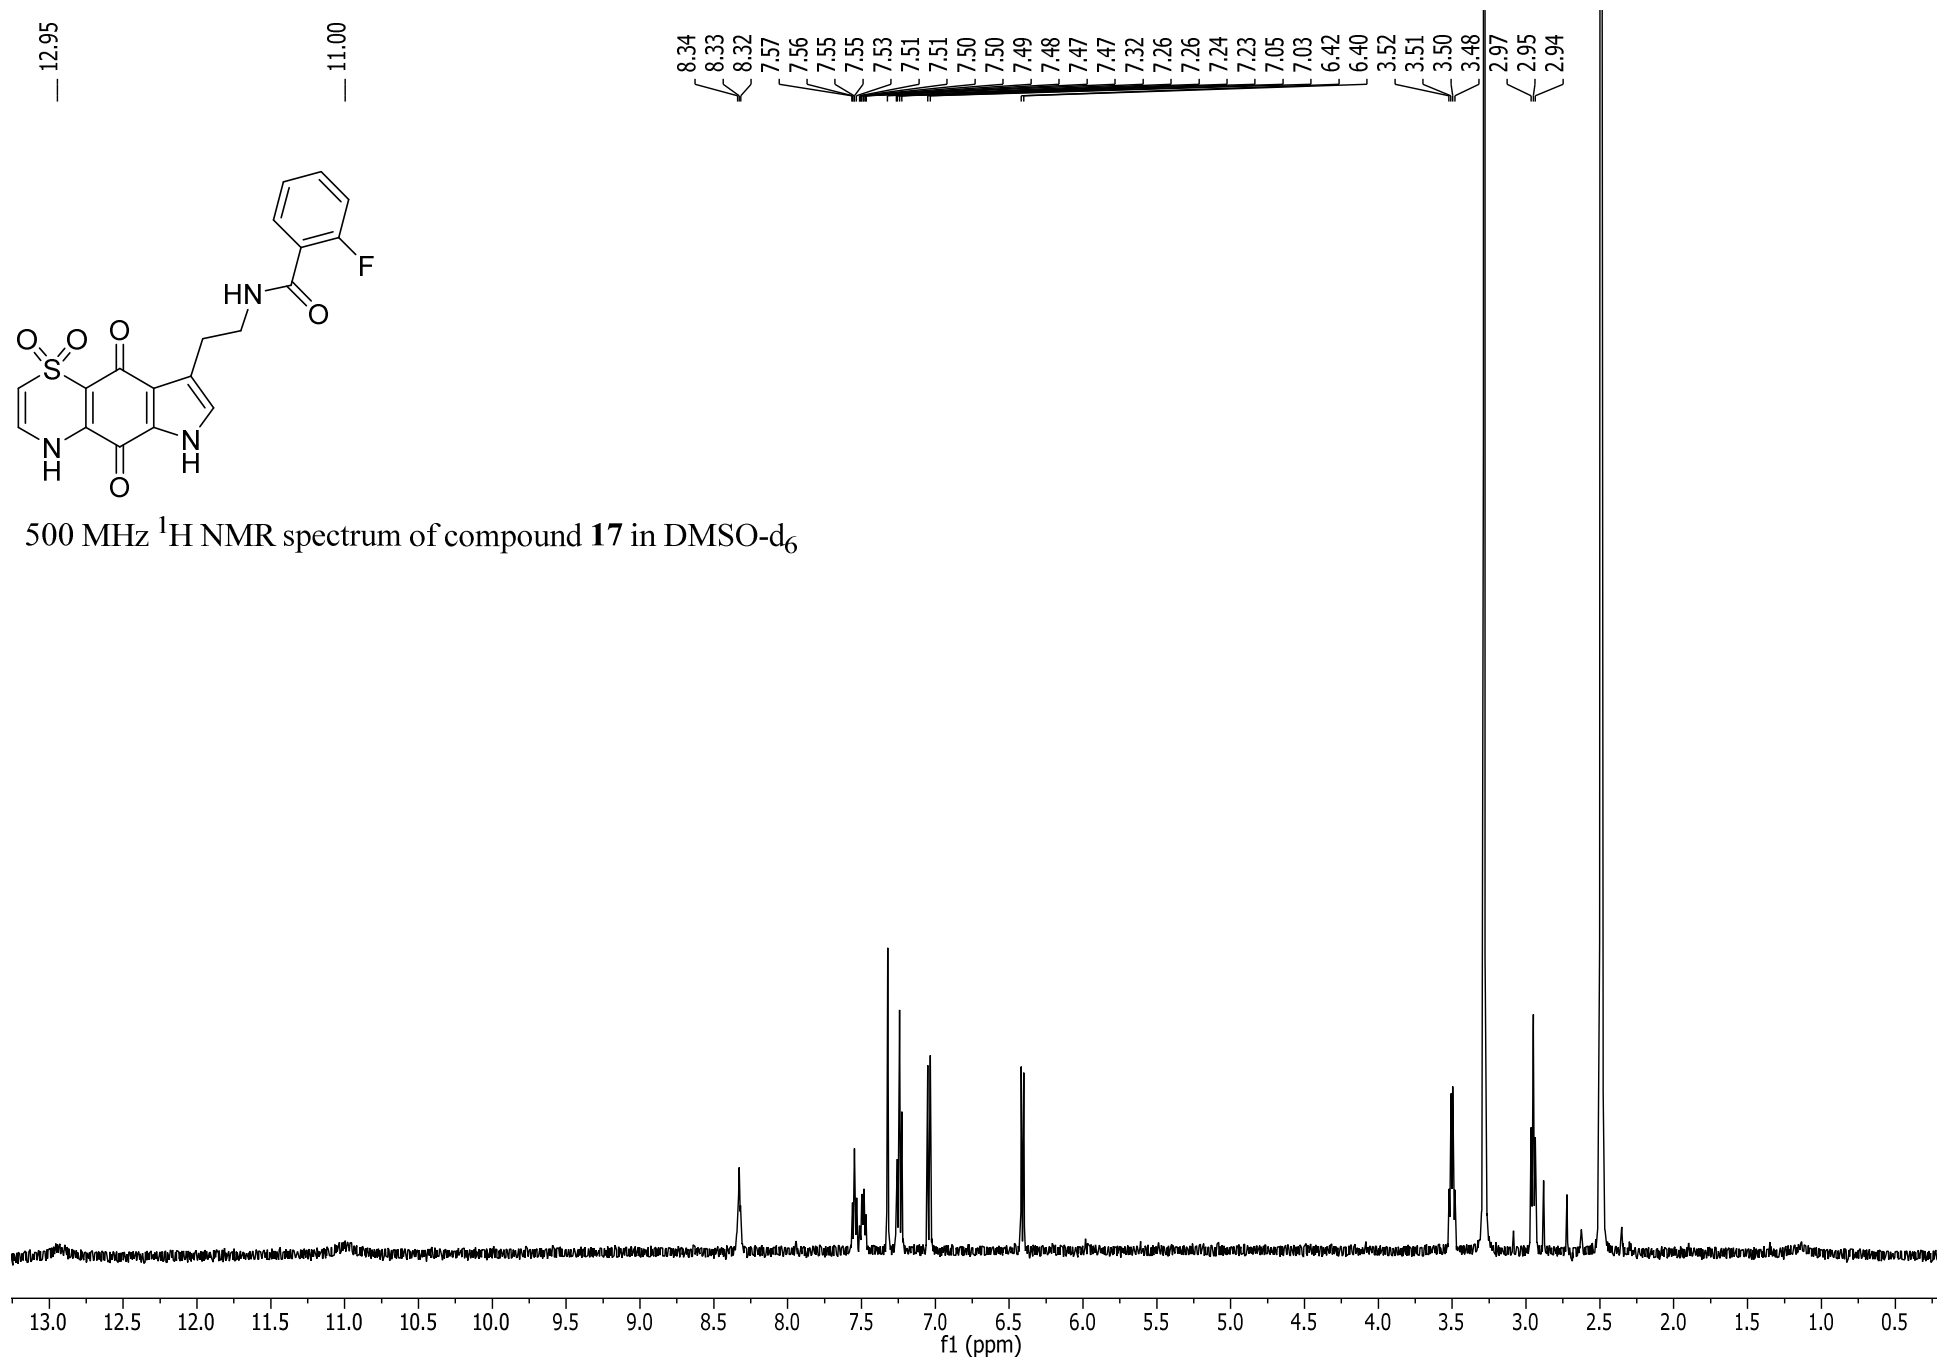

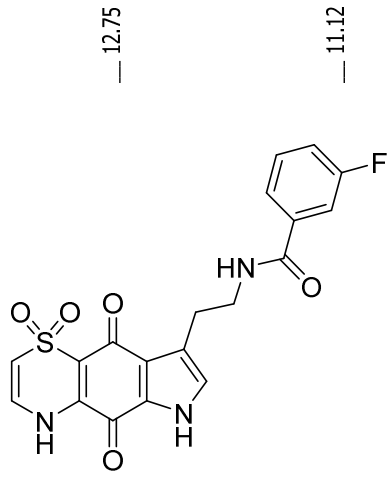

500 MHz  $^1\text{H}$  NMR spectrum of compound **18** in  $\text{DMSO-d}_6$

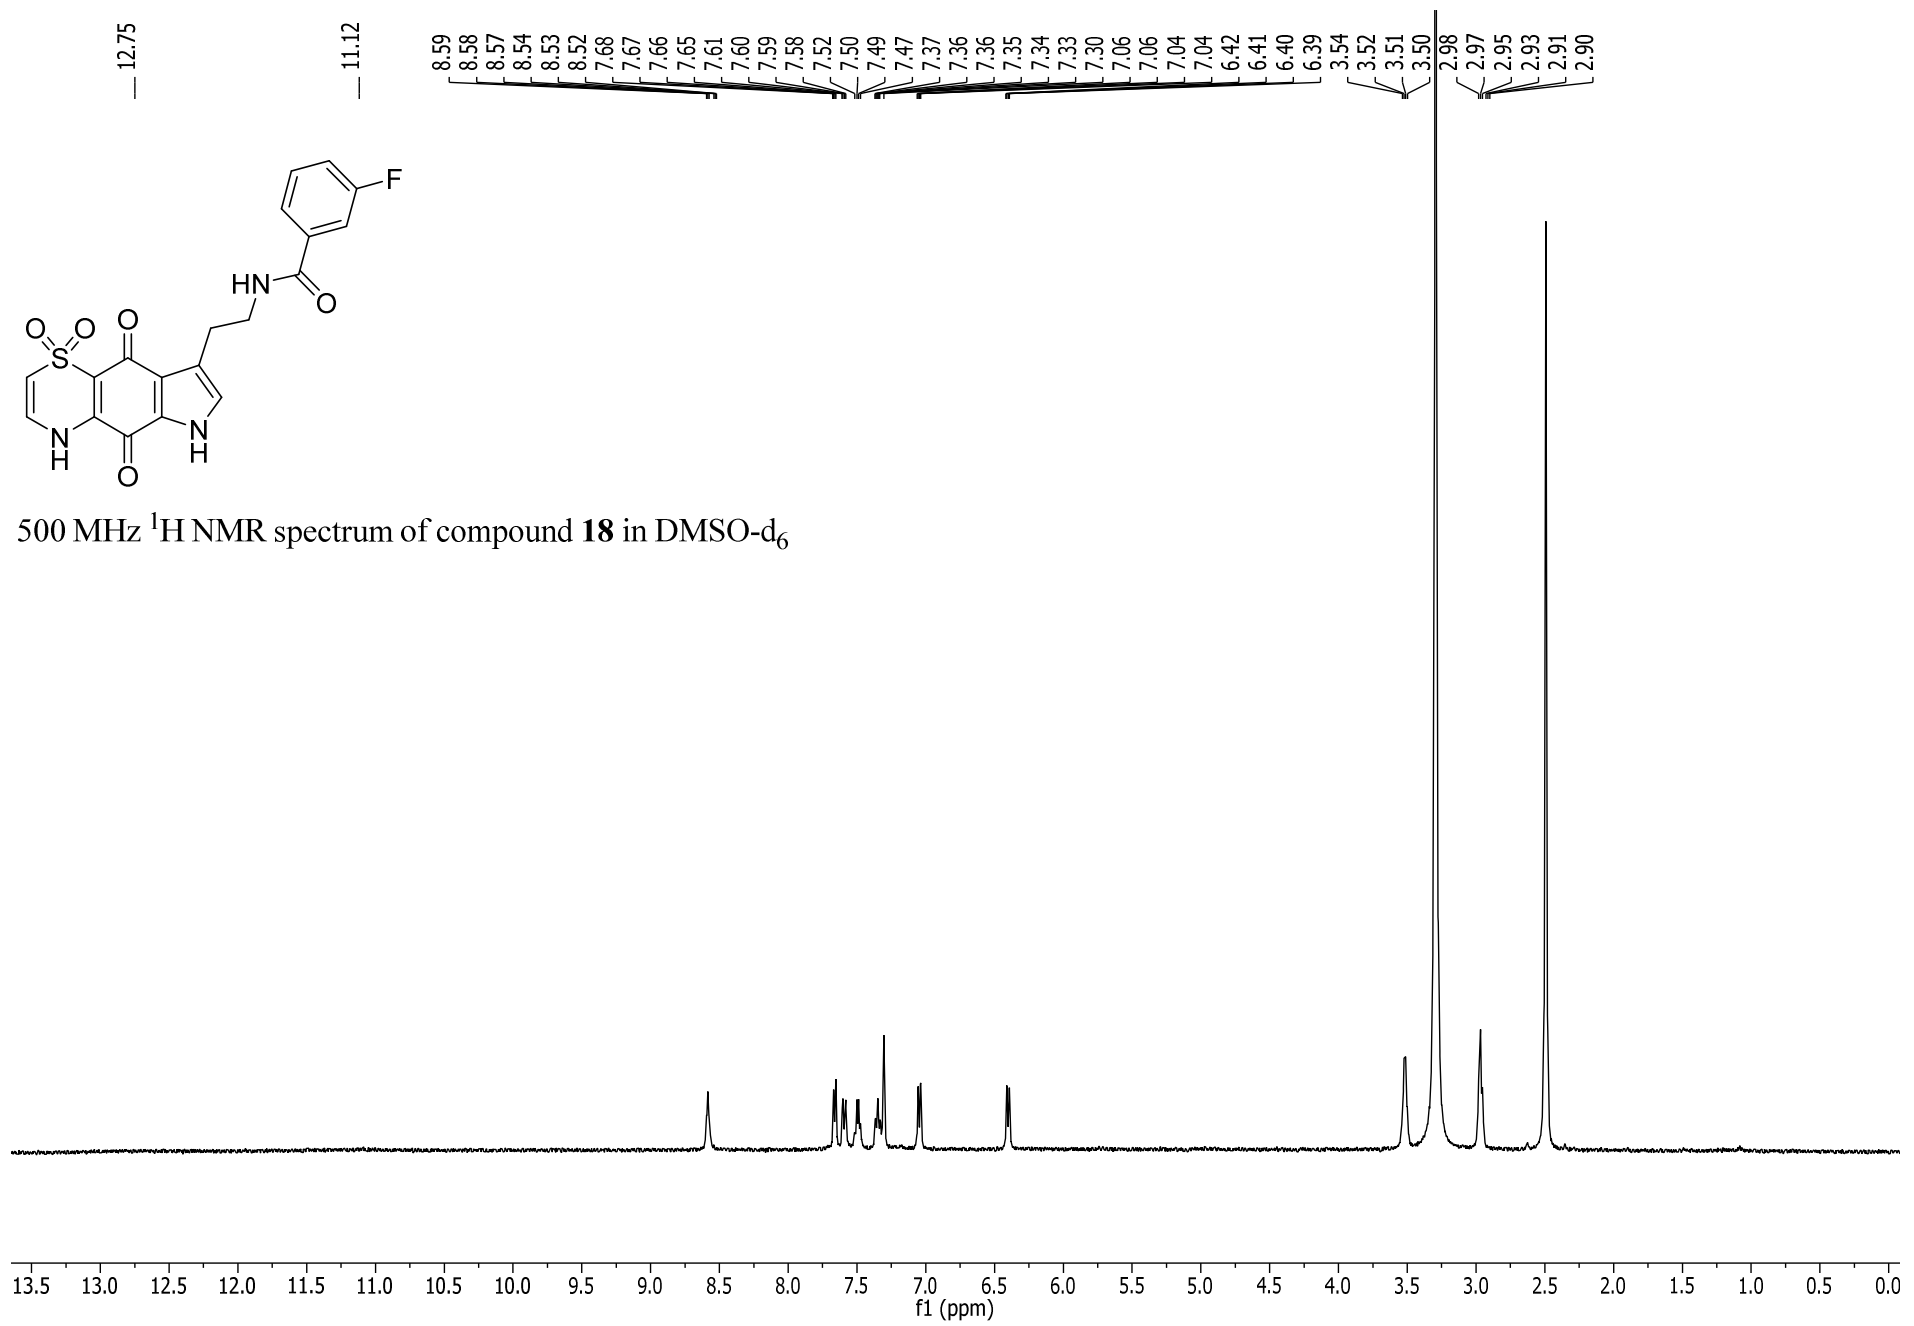

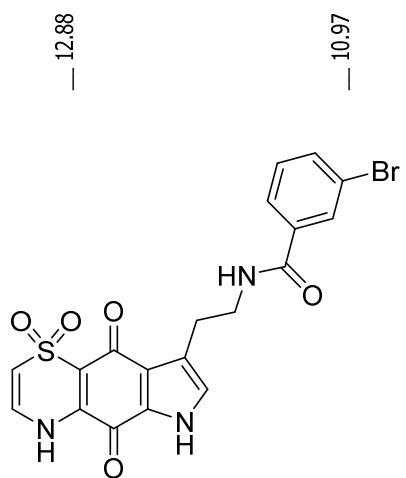

500 MHz  $^1\text{H}$  NMR spectrum of compound **19** in  $\text{DMSO-d}_6$

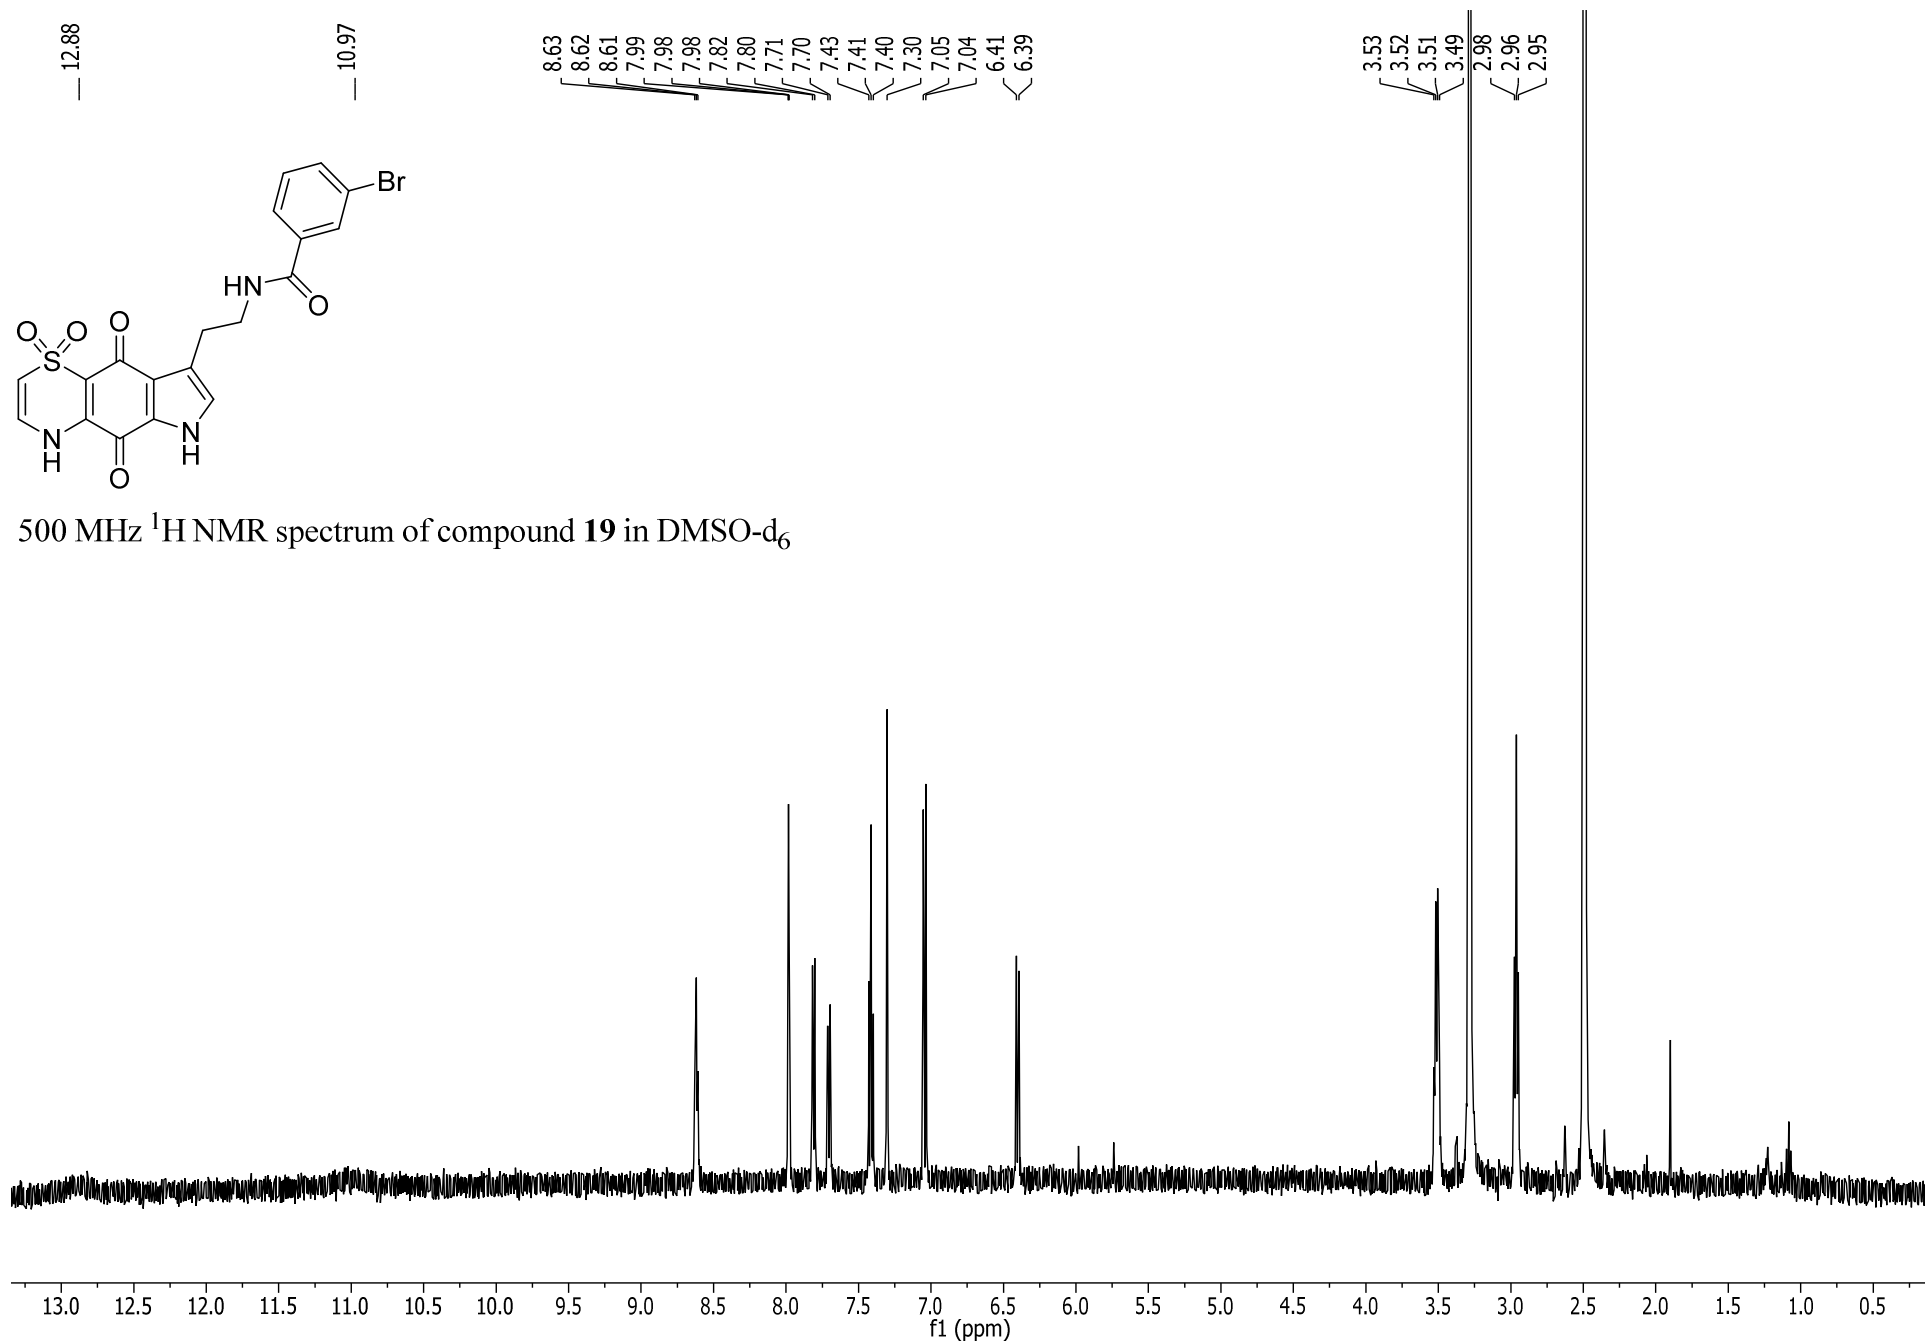

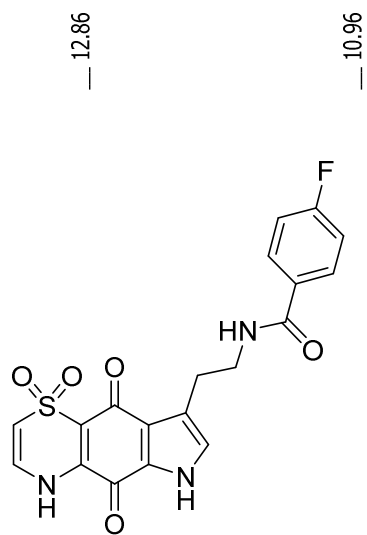

500 MHz  $^1\text{H}$  NMR spectrum of compound **20** in  $\text{DMSO-d}_6$

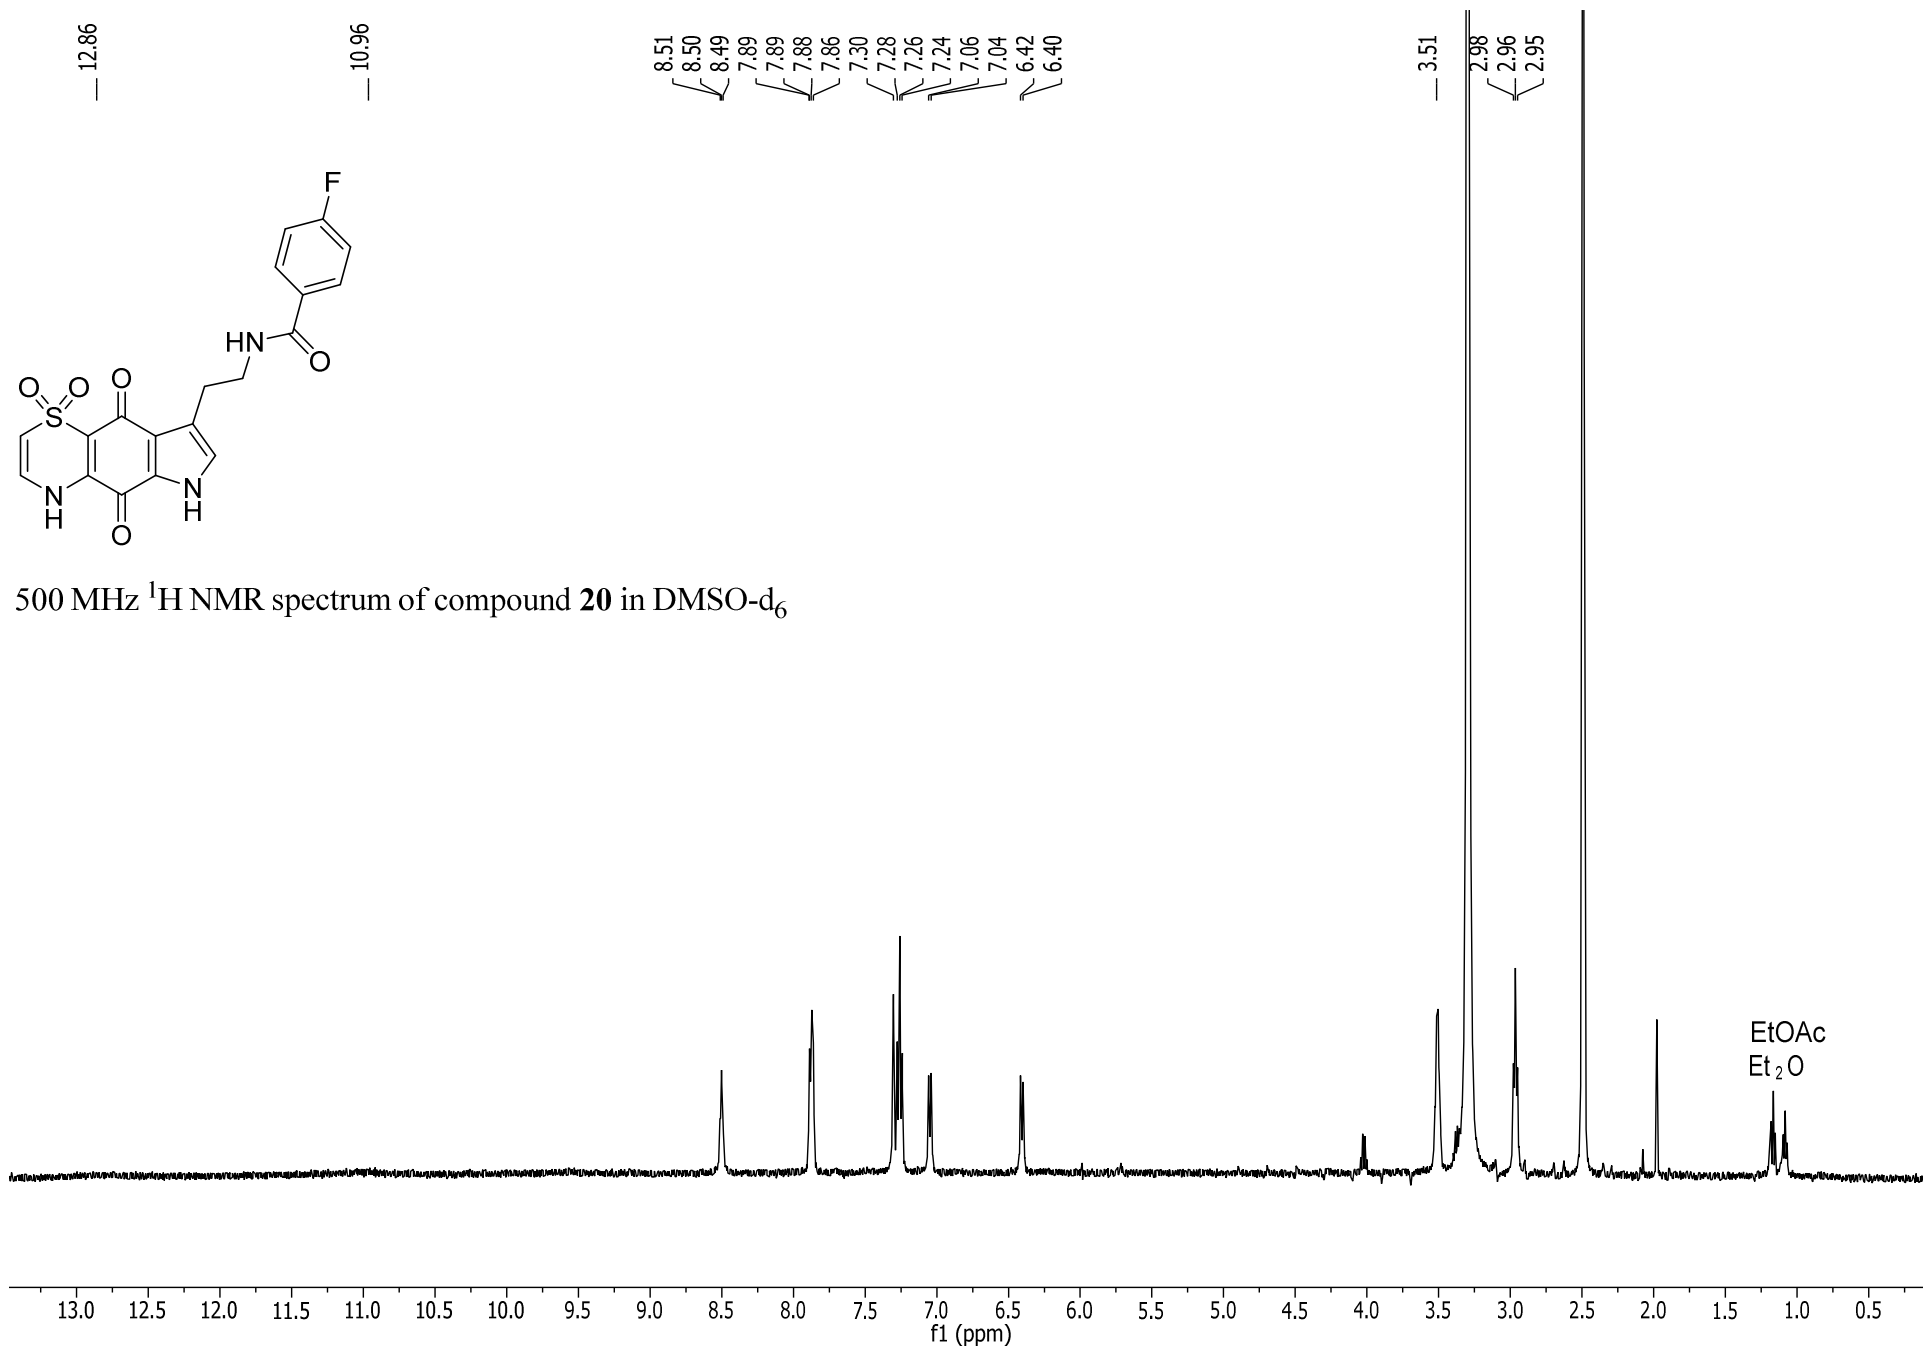

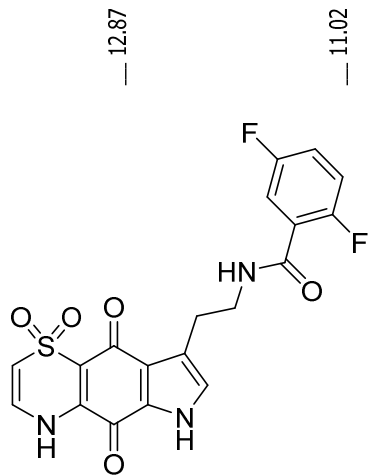

500 MHz  $^1\text{H}$  NMR spectrum of compound **21** in  $\text{DMSO-d}_6$

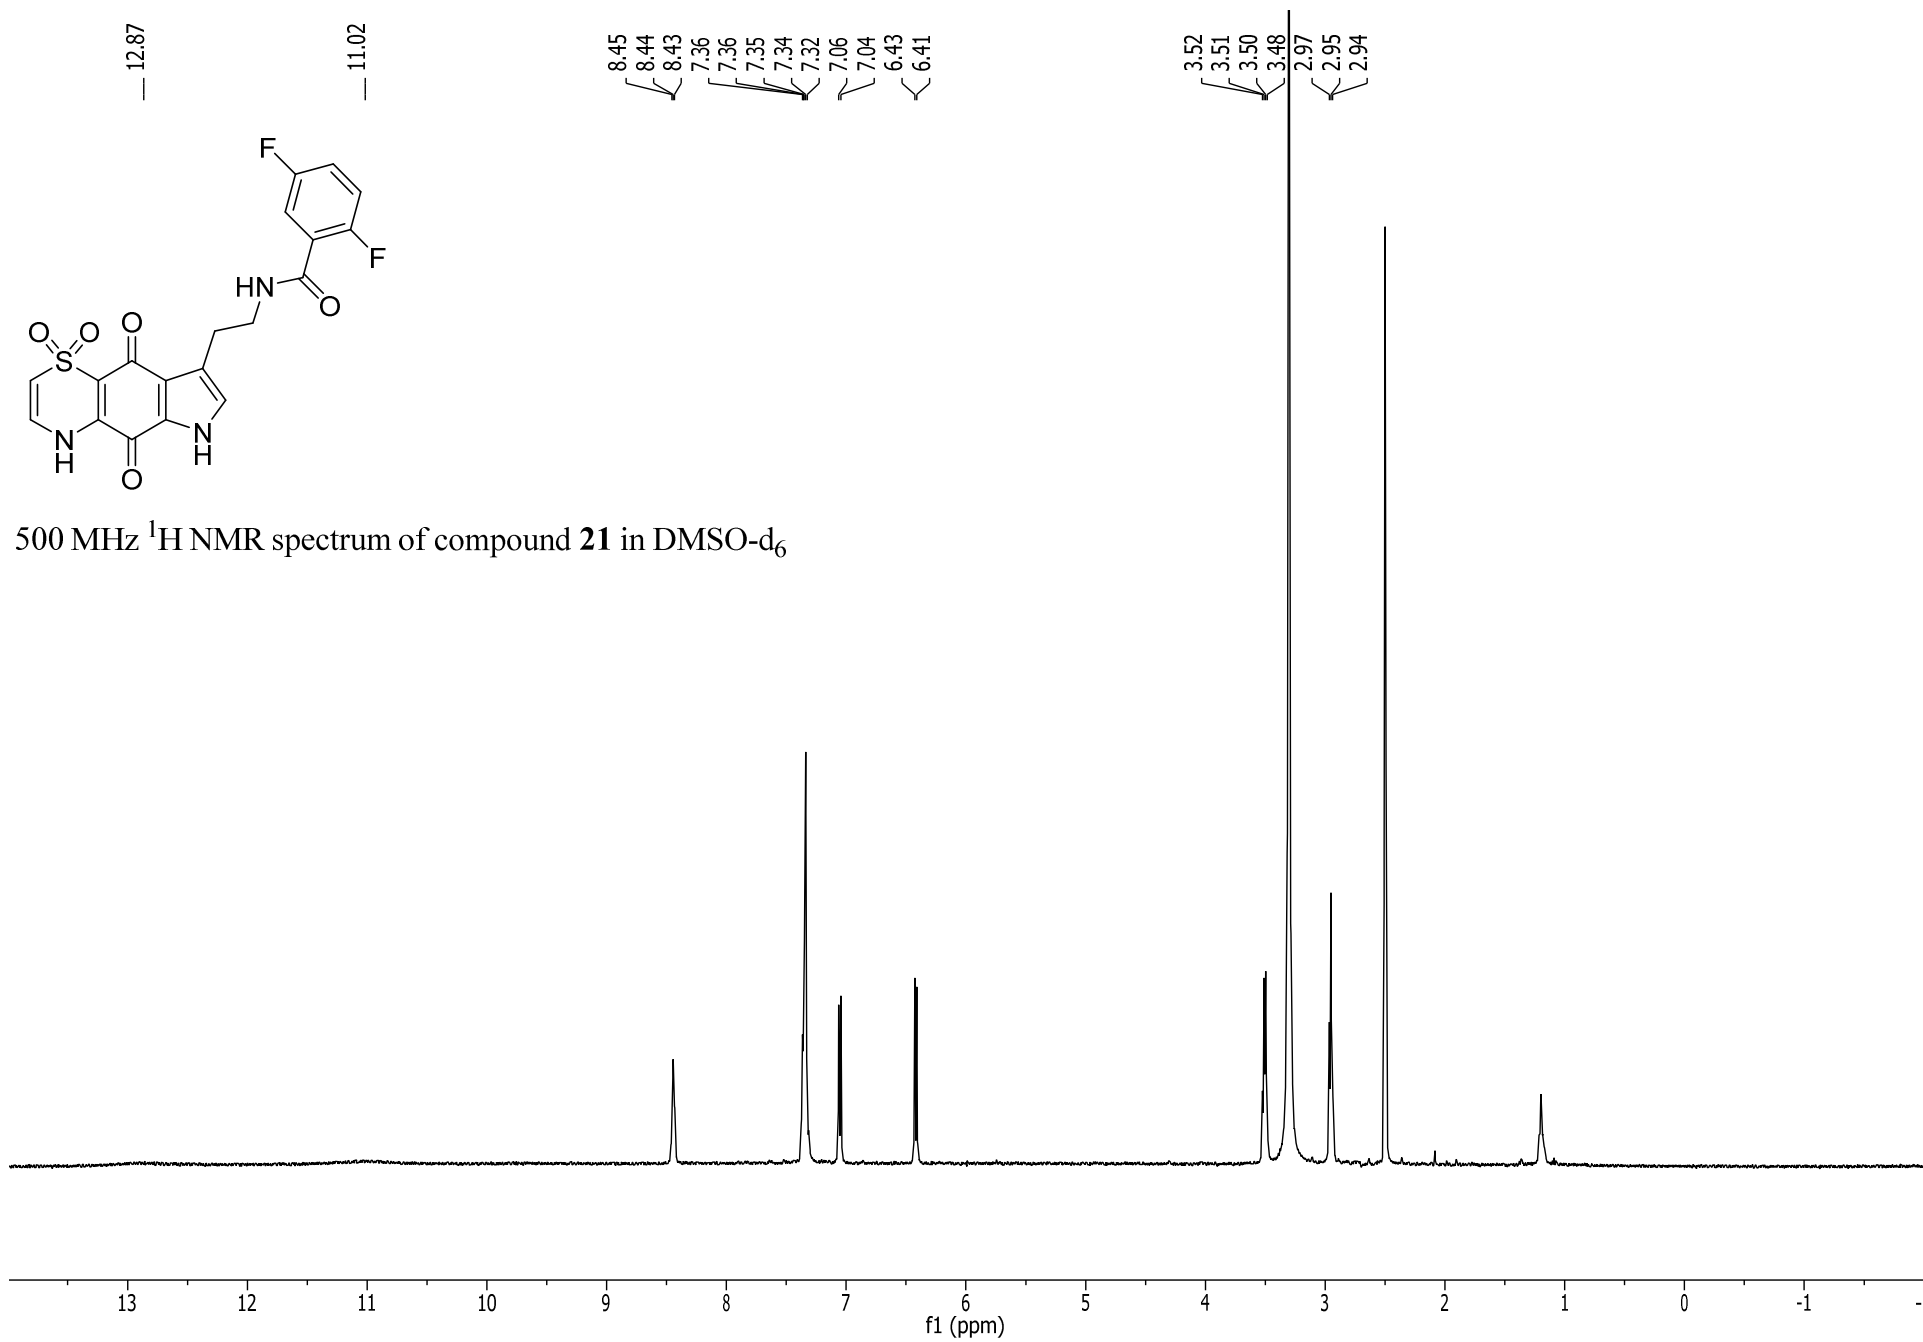

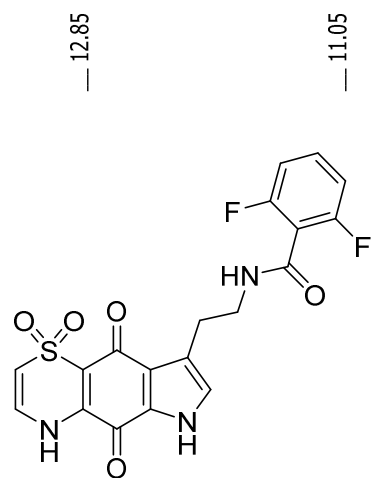

500 MHz  $^1\text{H}$  NMR spectrum of compound **22** in DMSO- $d_6$

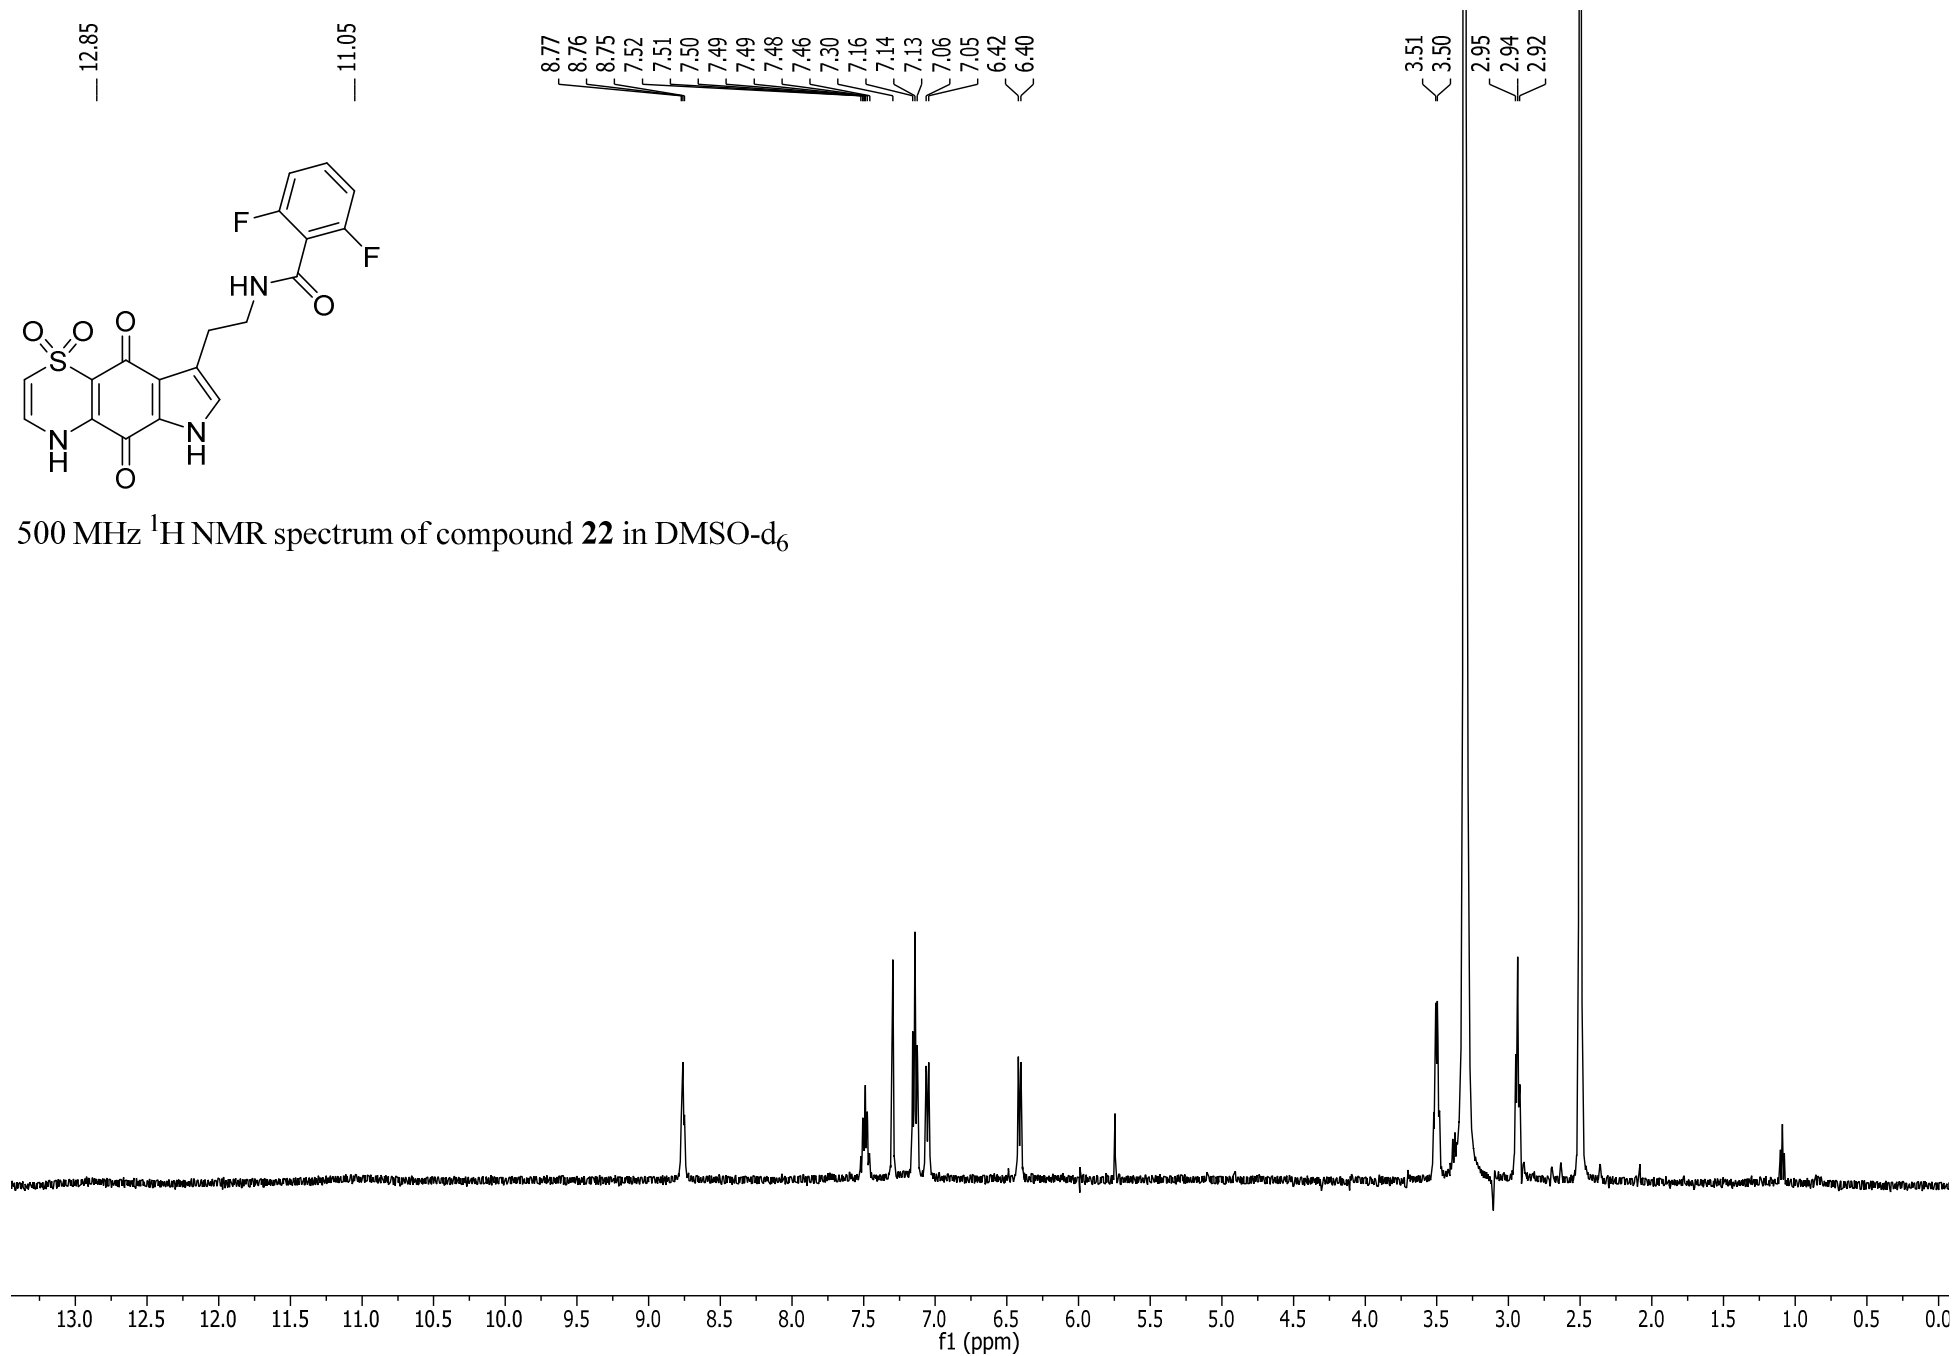



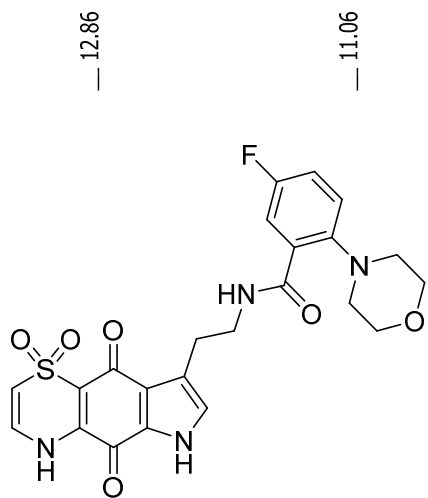

500 MHz  $^1\text{H}$  NMR spectrum of compound **23** in DMSO- $d_6$

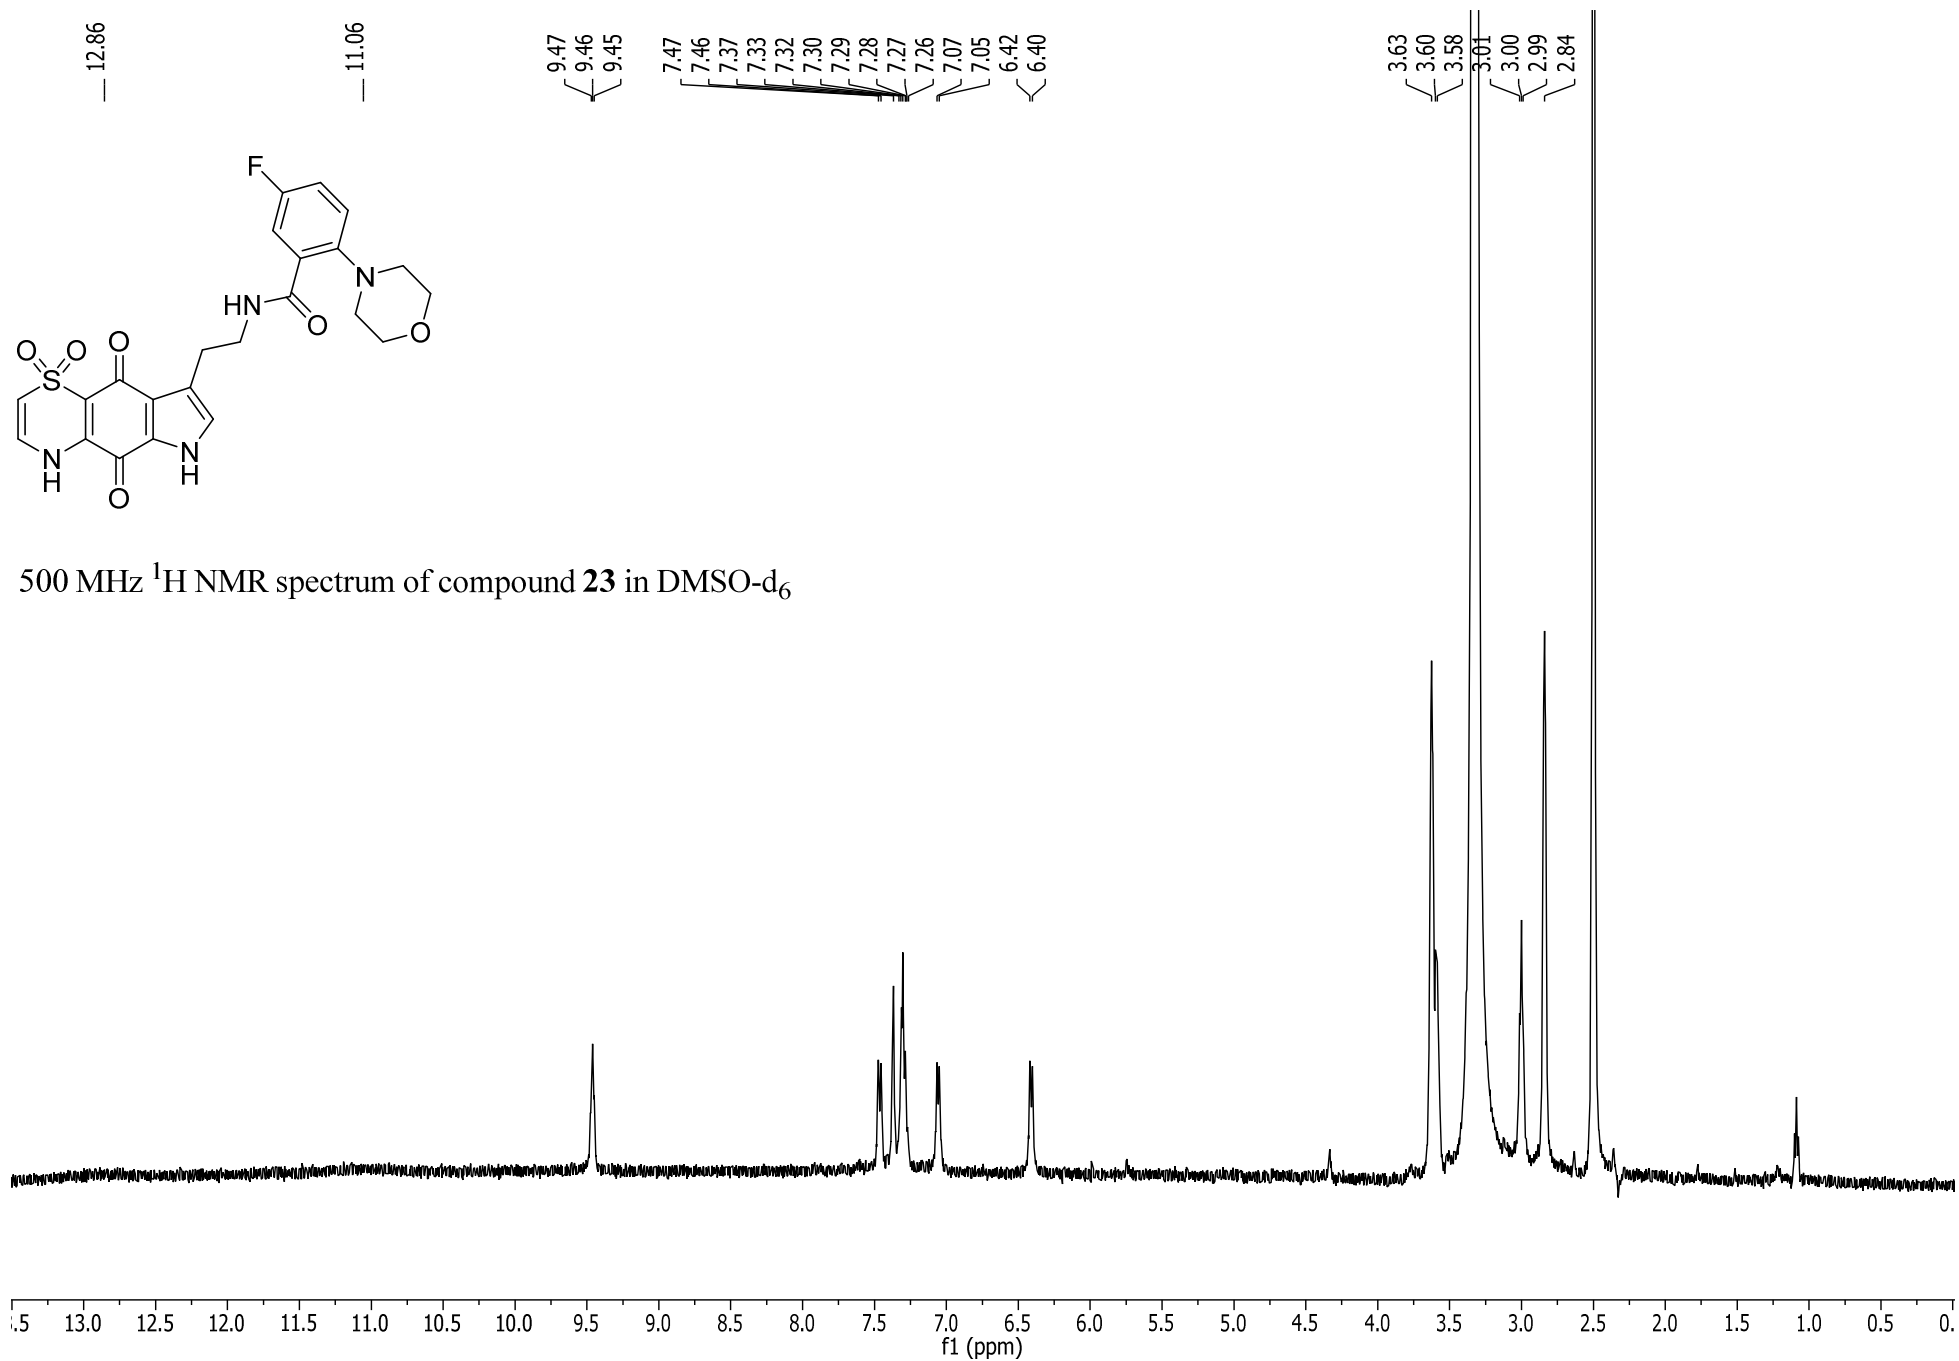

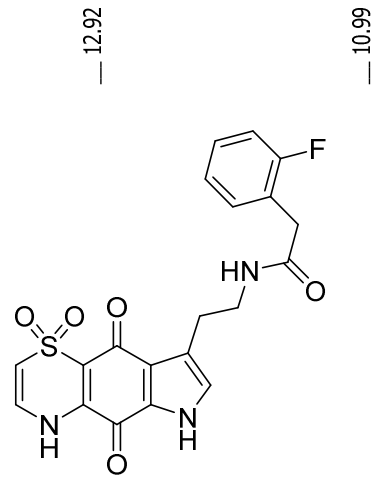

500 MHz  $^1\text{H}$  NMR spectrum of compound **24** in  $\text{DMSO-d}_6$

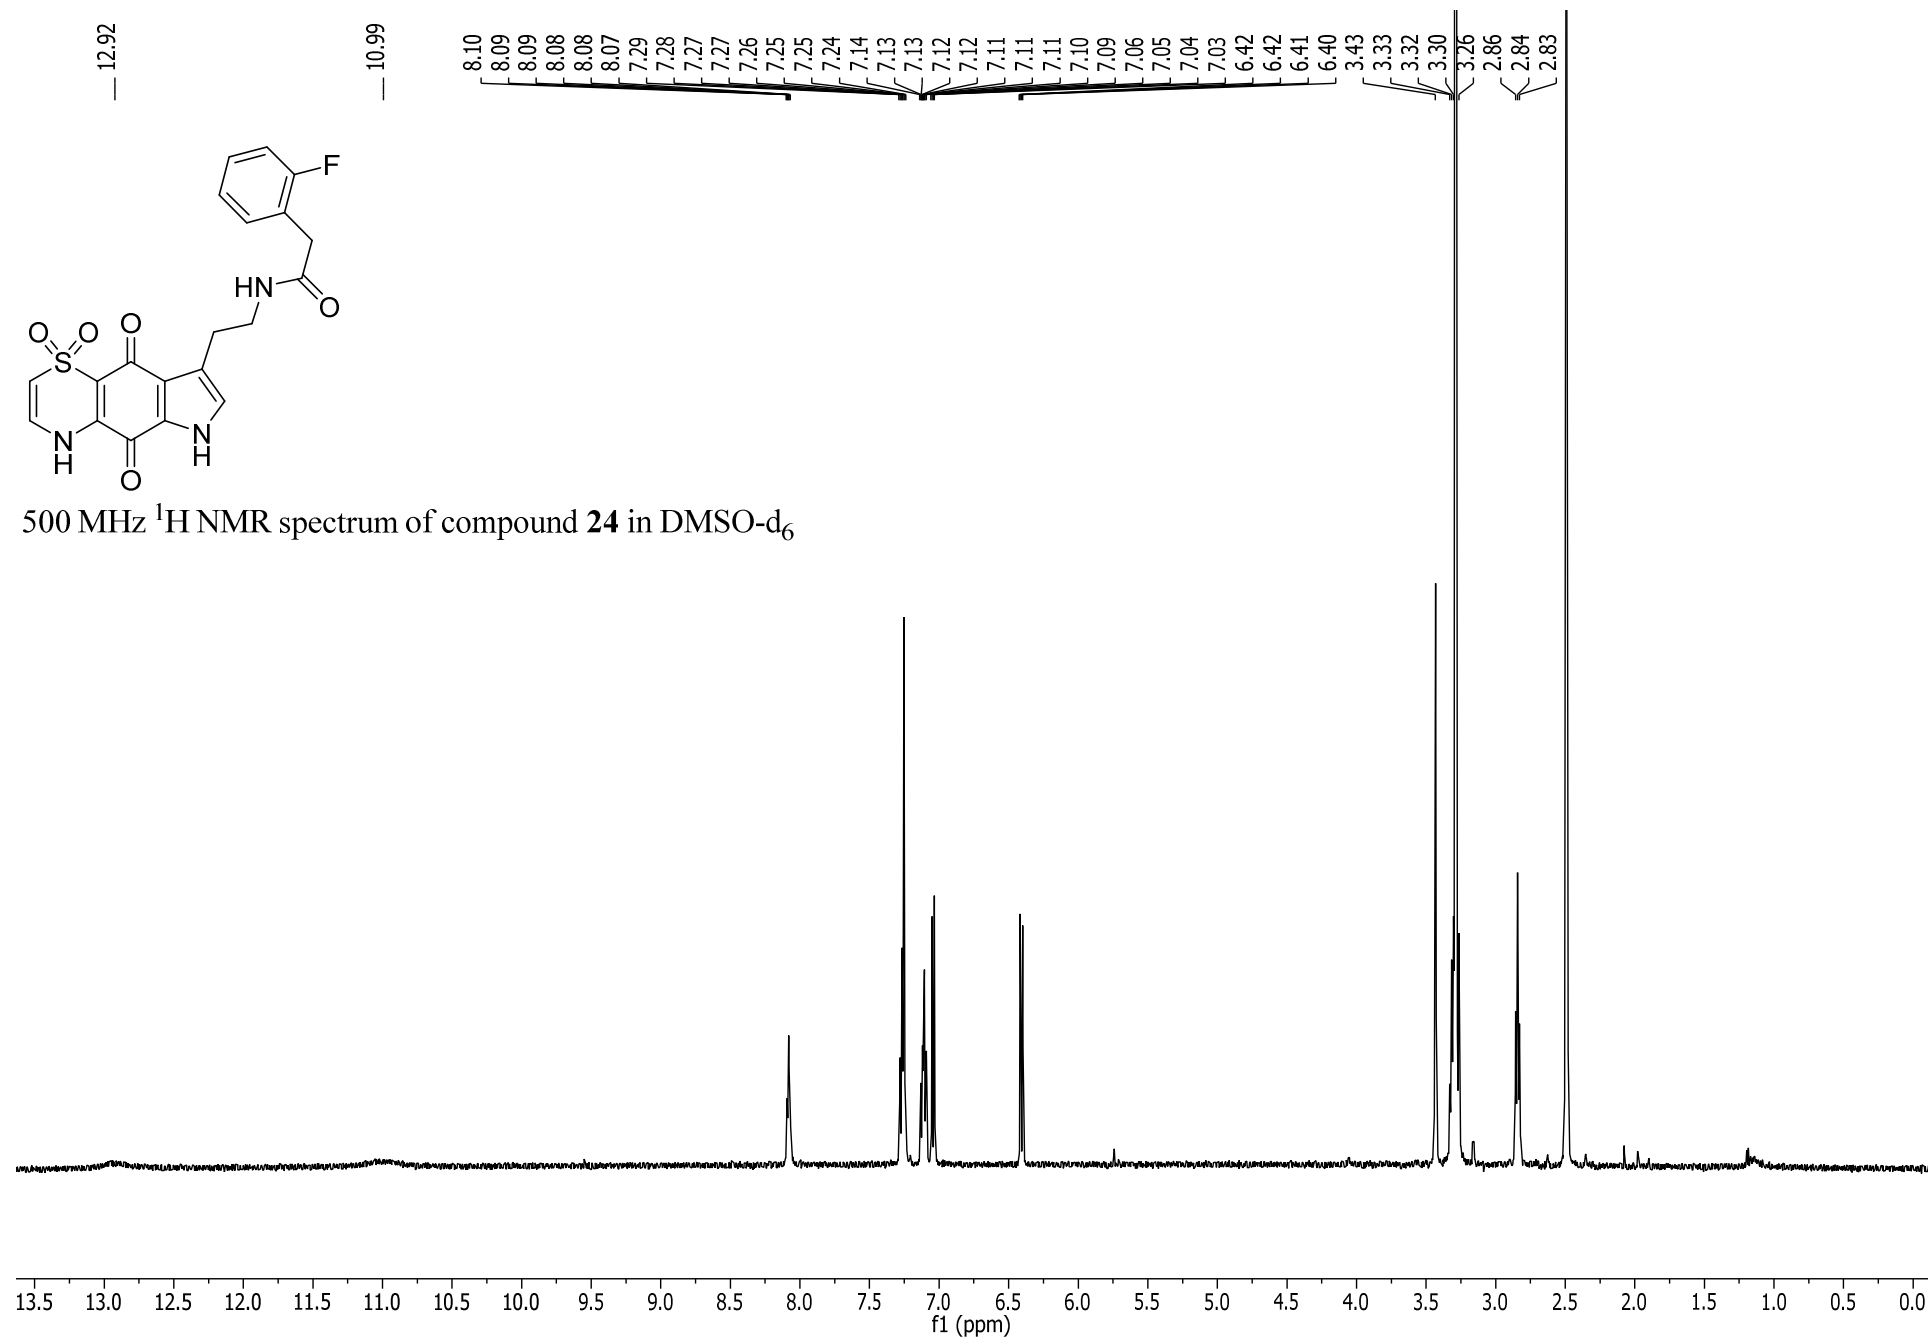

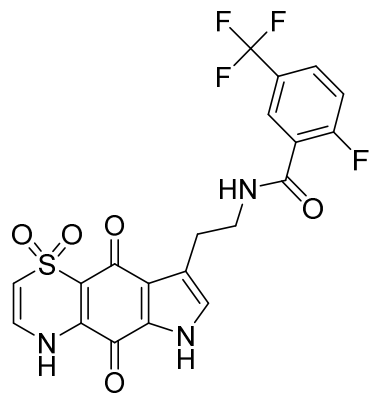

8.58  
7.94  
7.54  
7.52  
7.51  
7.32  
7.06  
7.04  
6.39  
6.37

500 MHz  $^1\text{H}$  NMR spectrum of compound **25** in  $\text{DMSO-d}_6$

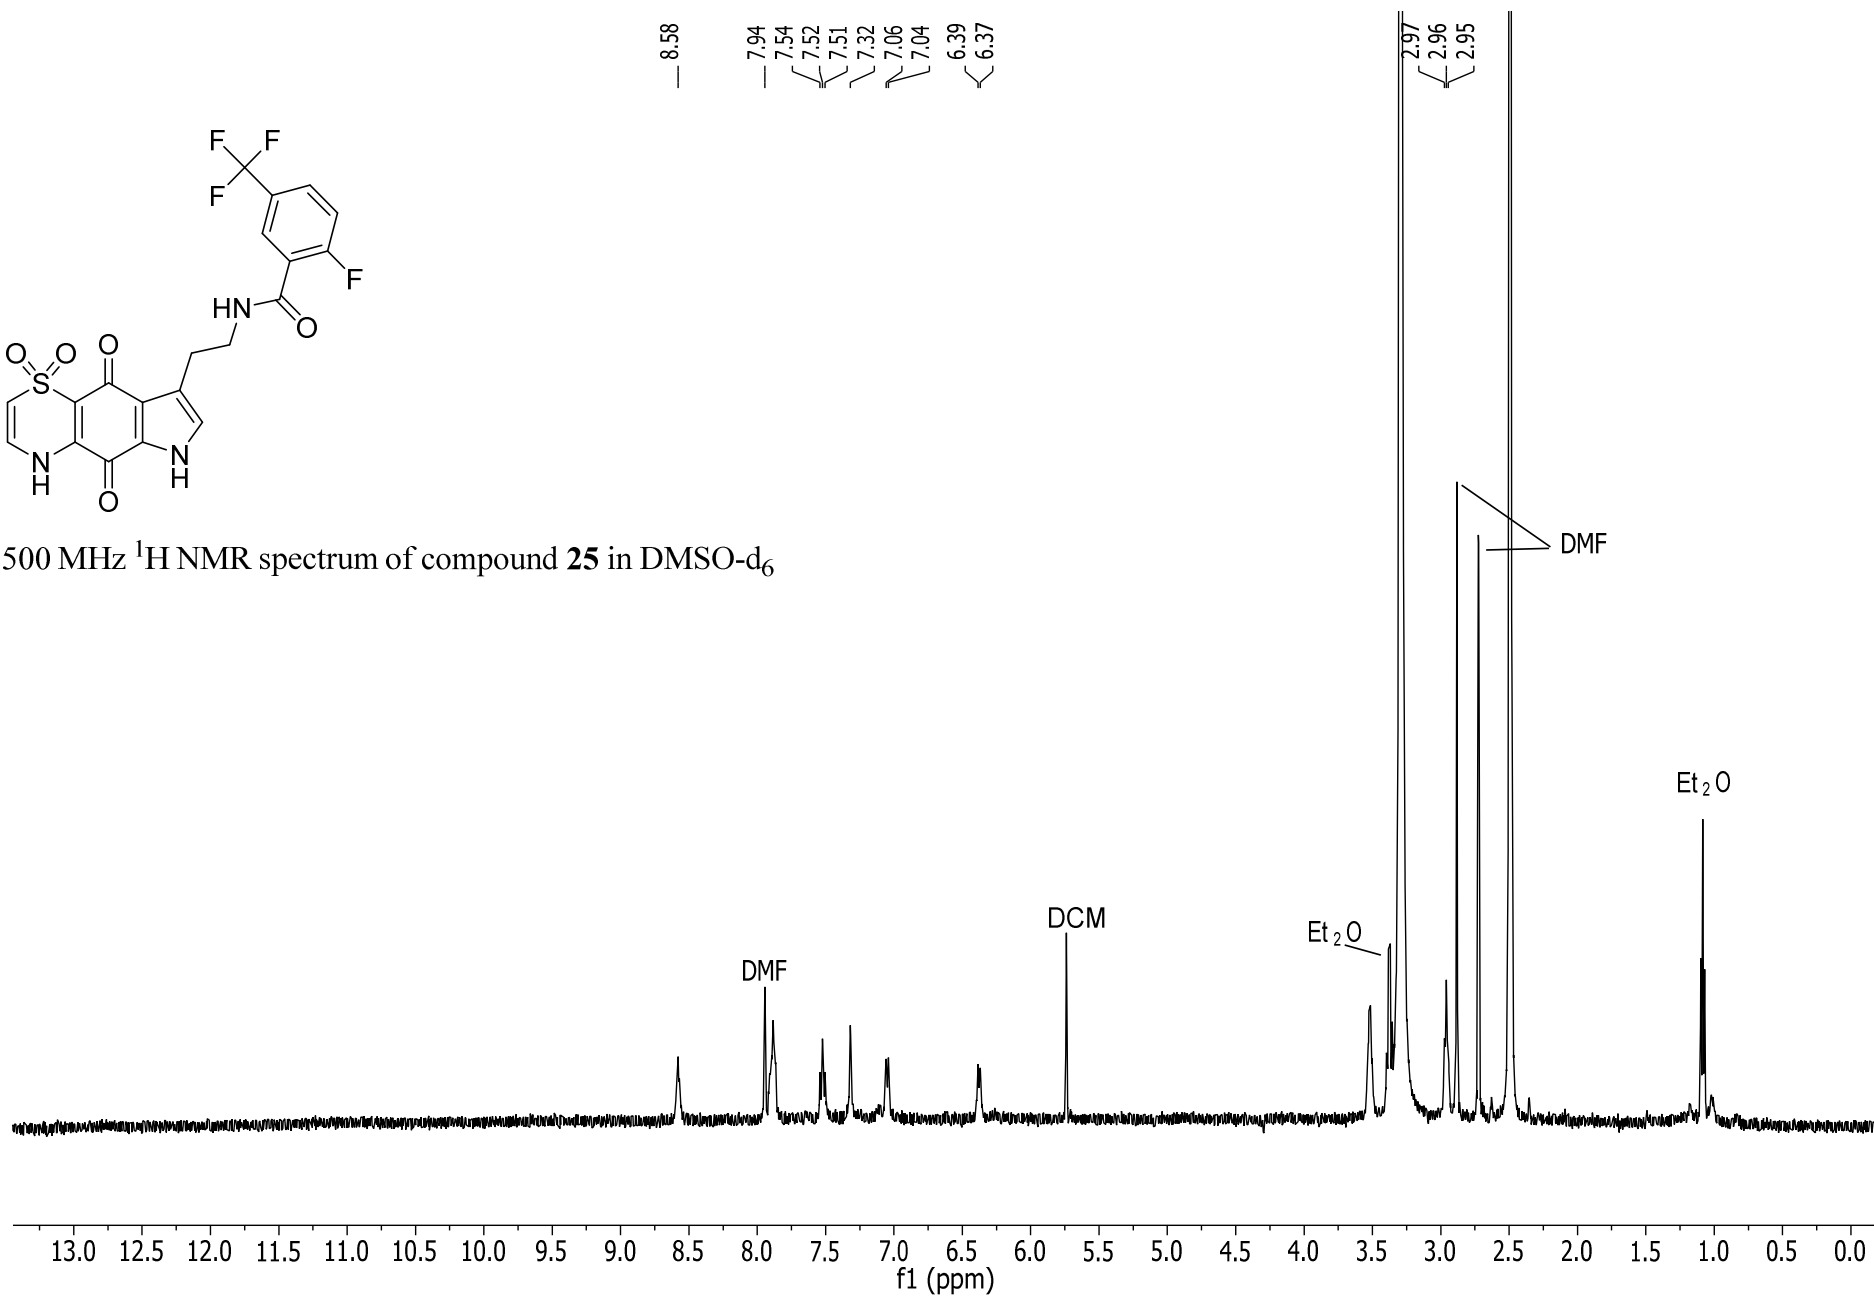

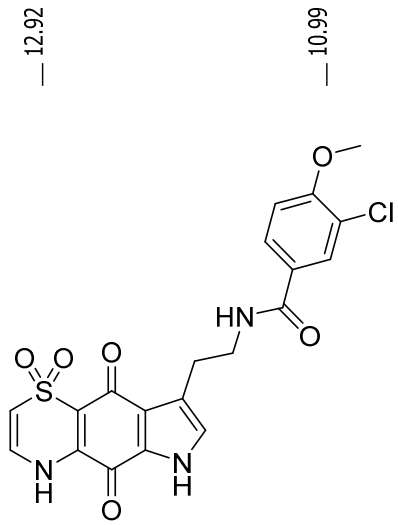

500 MHz  $^1\text{H}$  NMR spectrum of compound **26** in  $\text{DMSO-d}_6$

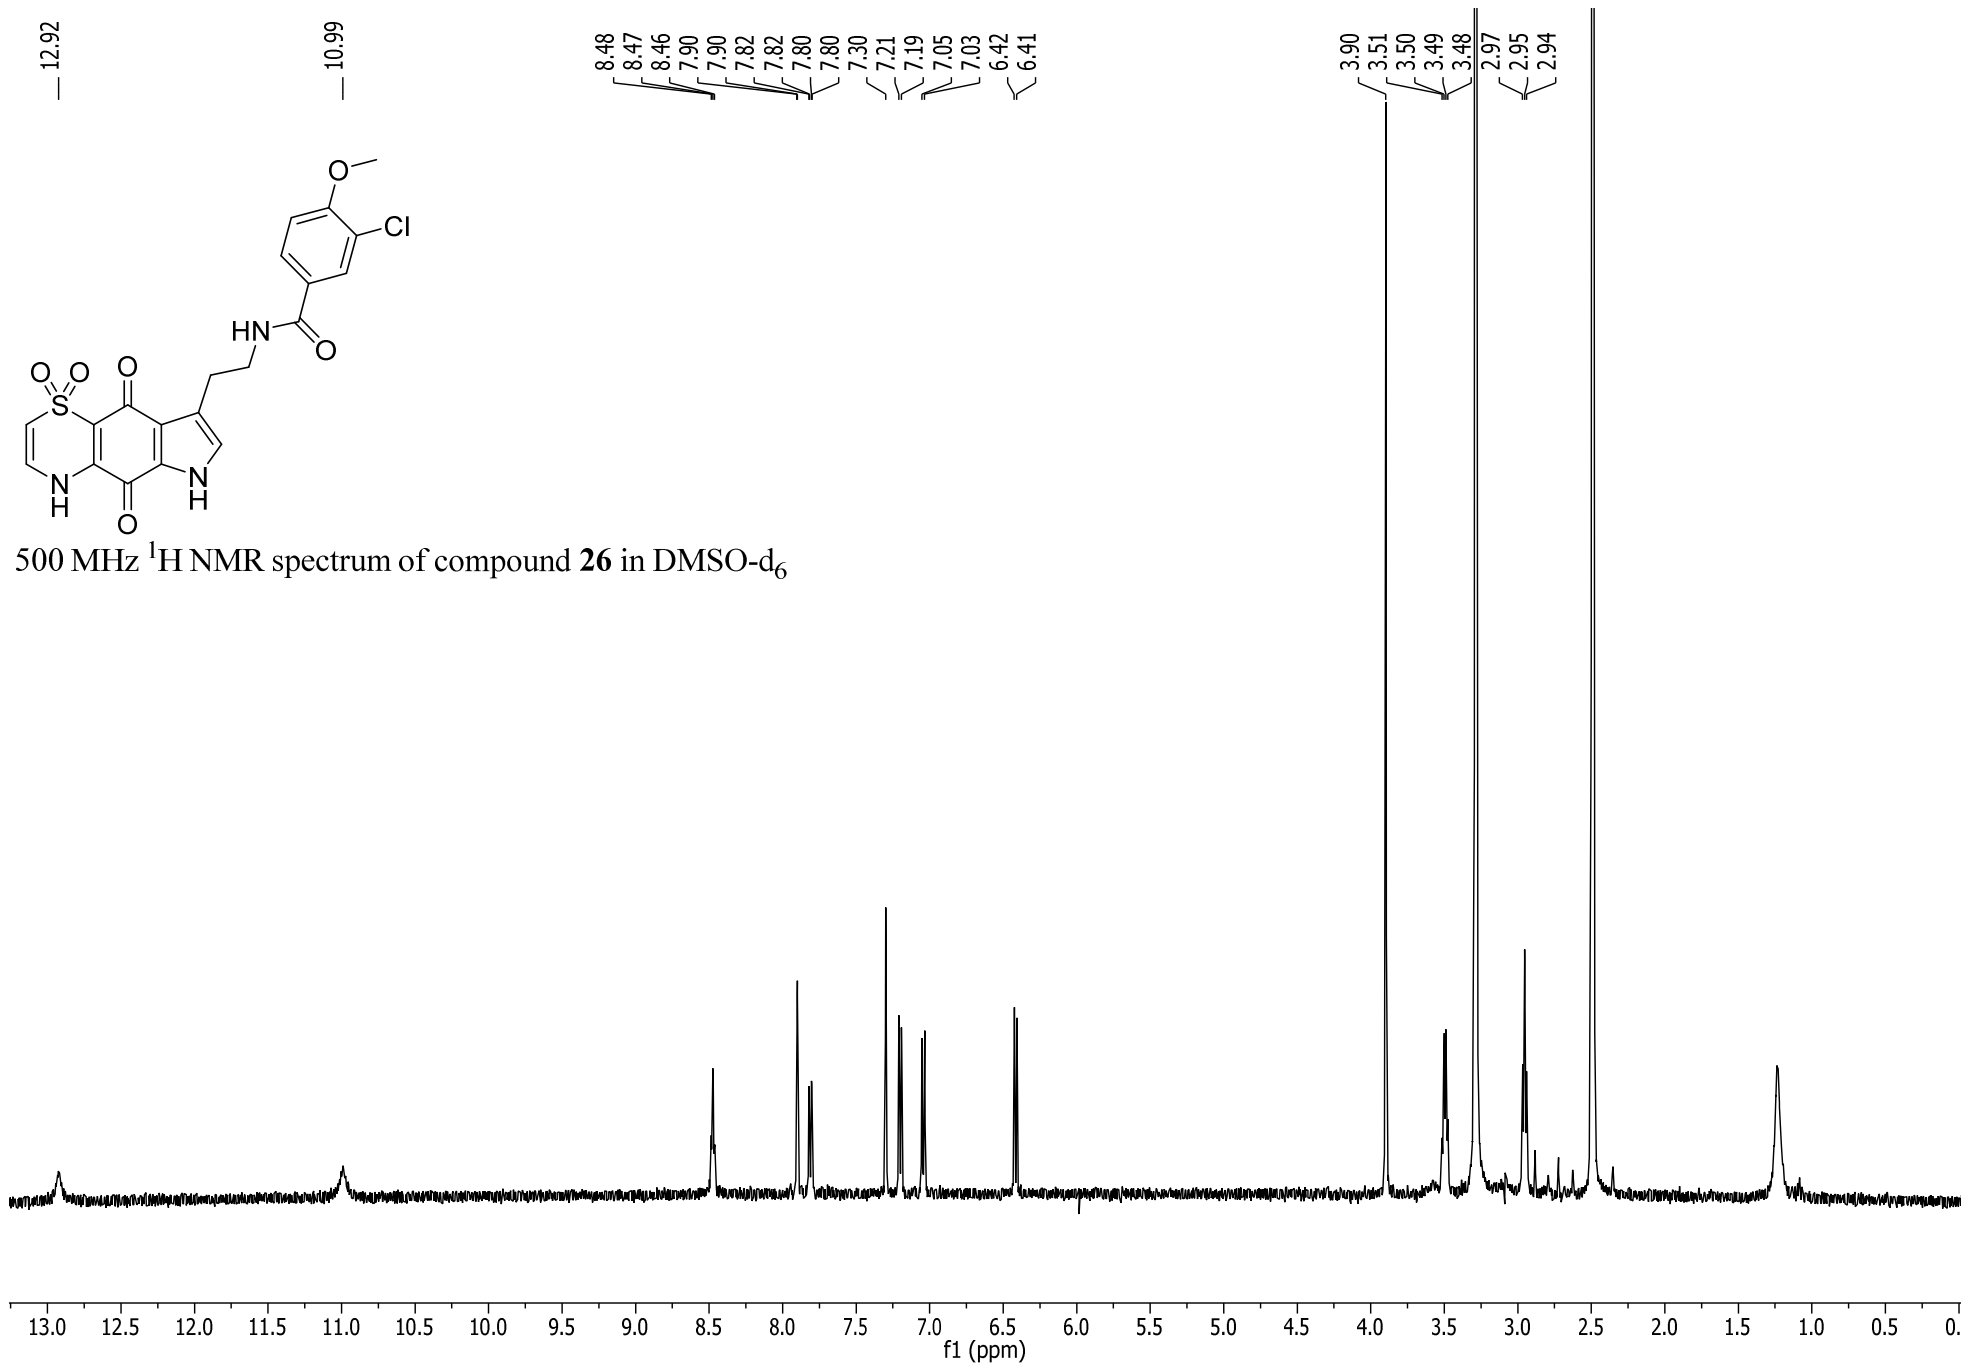

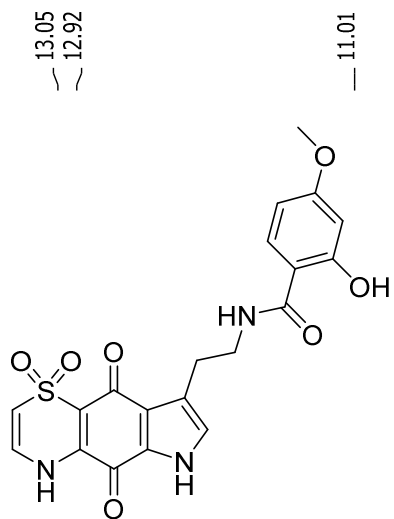

500 MHz  $^1\text{H}$  NMR spectrum of compound **27** in  $\text{DMSO-d}_6$

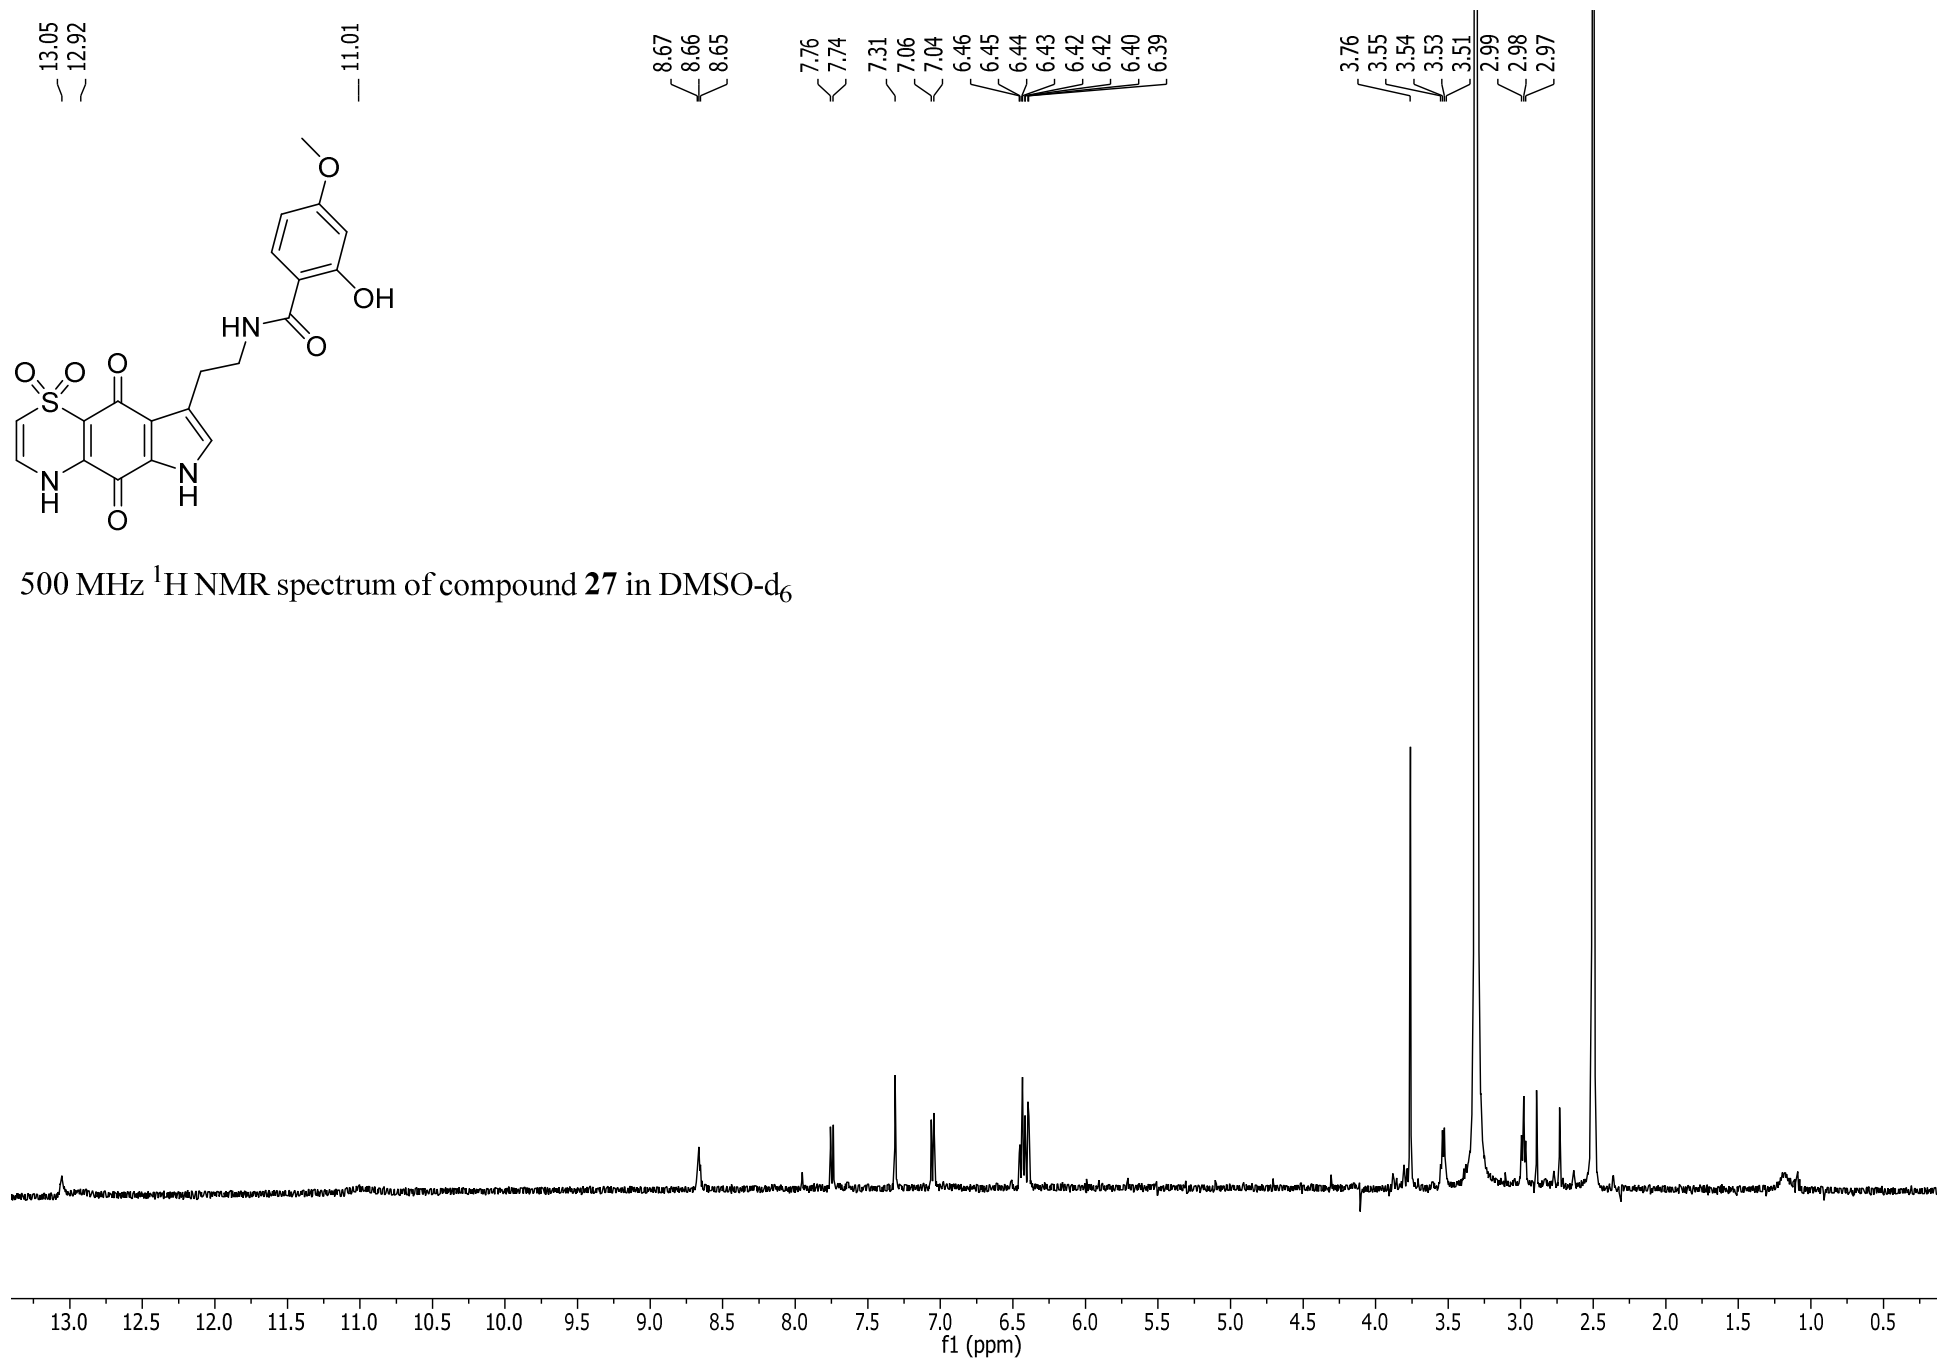

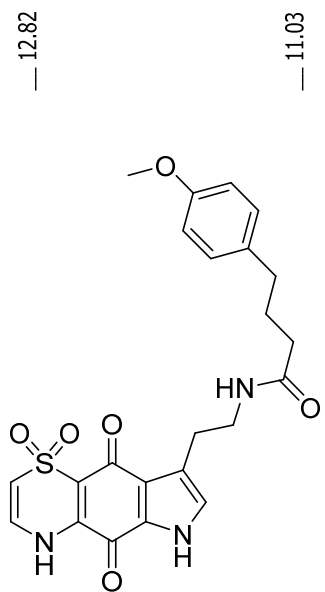

500 MHz  $^1\text{H}$  NMR spectrum of compound **28** in  $\text{DMSO-d}_6$

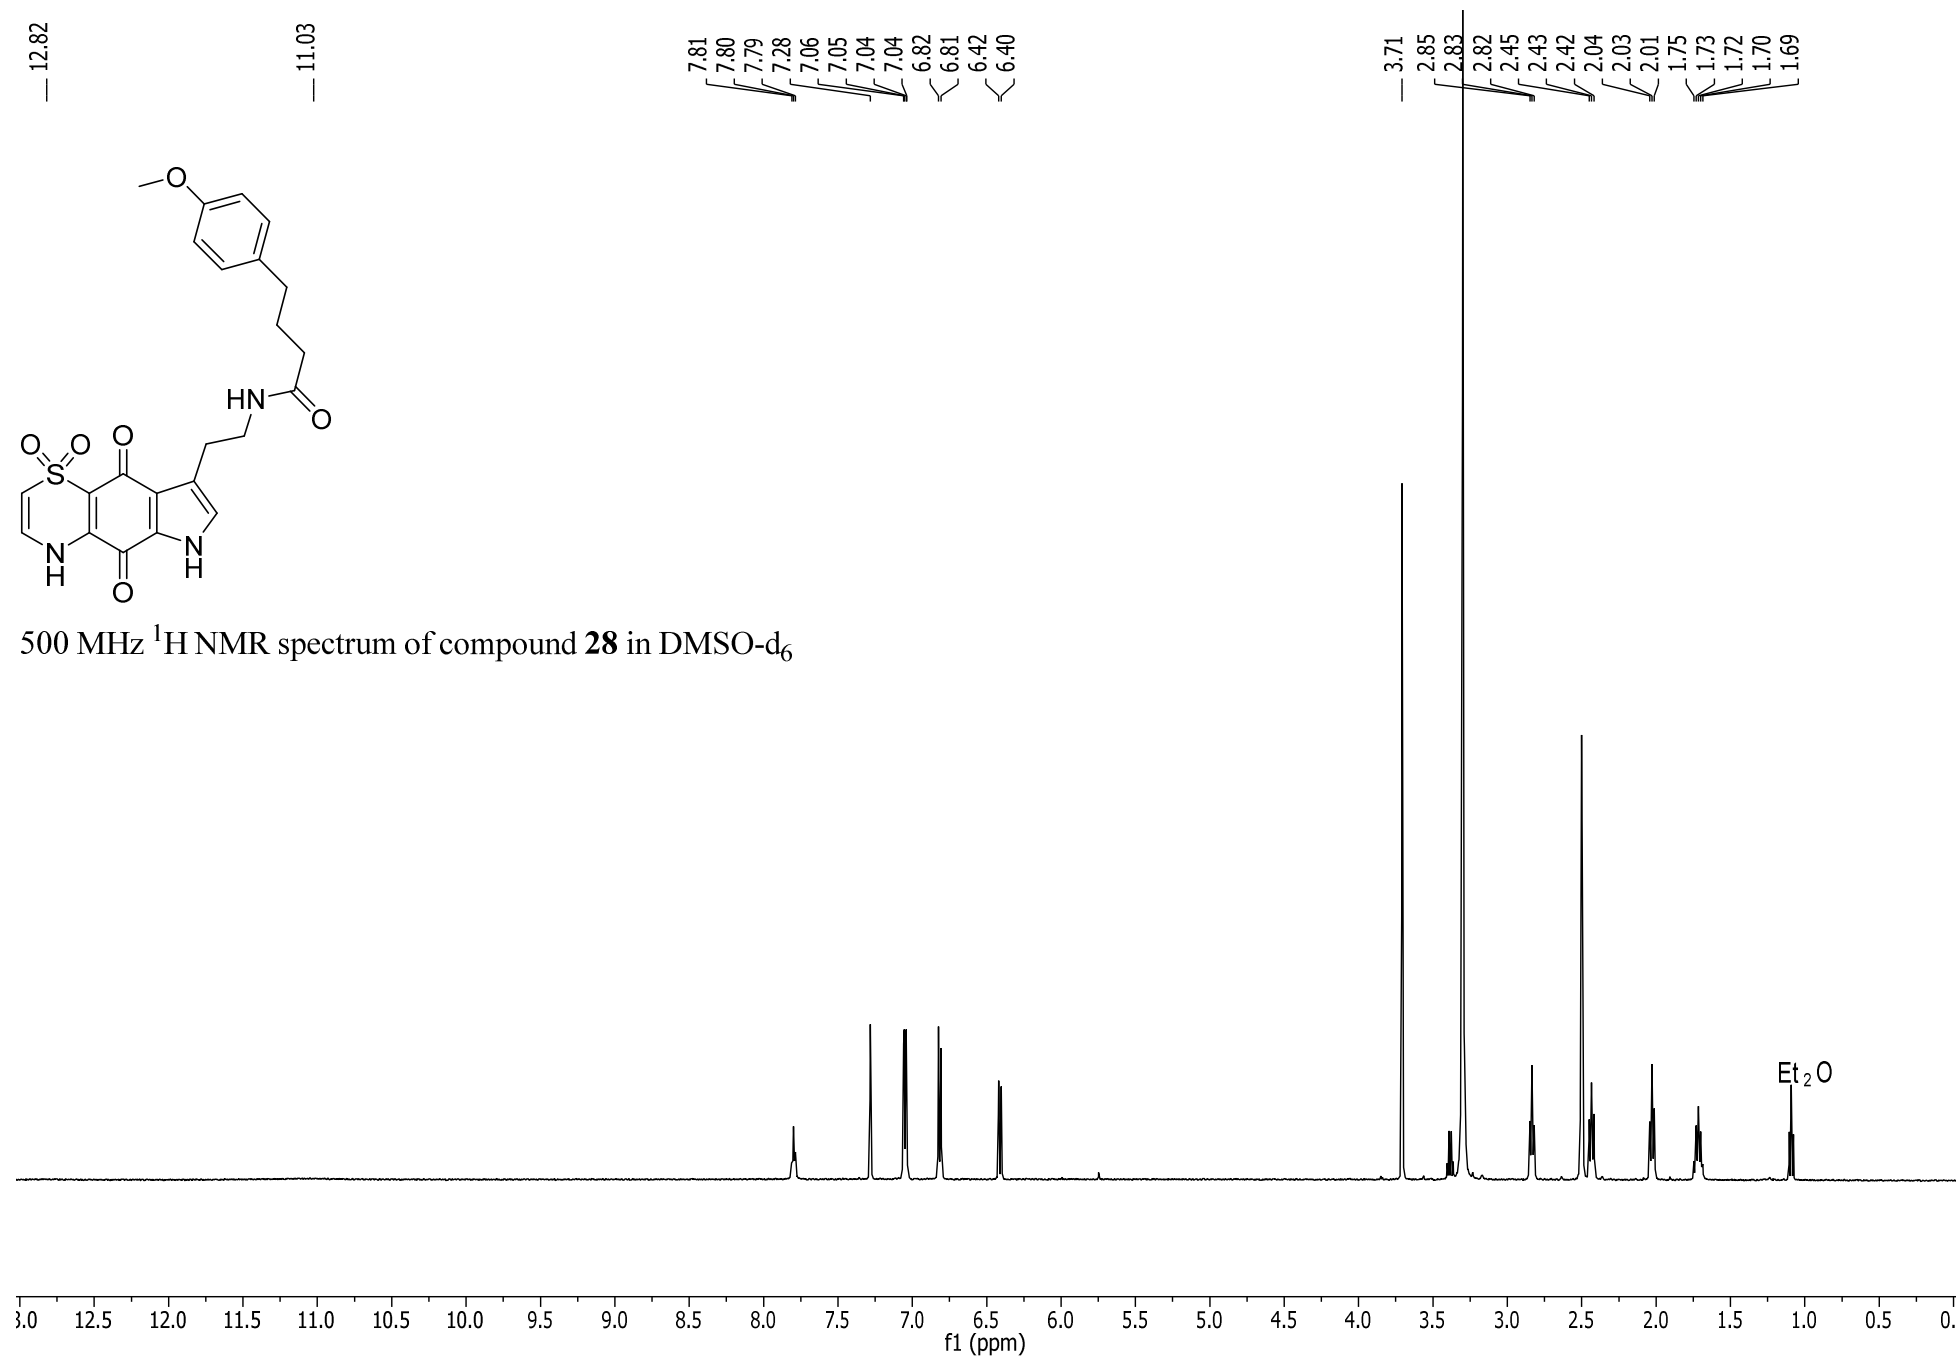

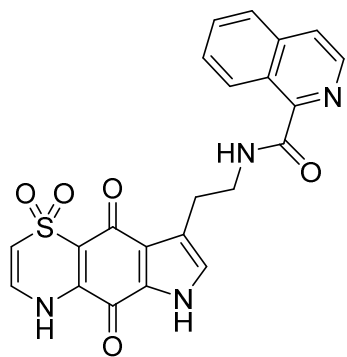

500 MHz  $^1\text{H}$  NMR spectrum of compound **29** in  $\text{DMSO-d}_6$

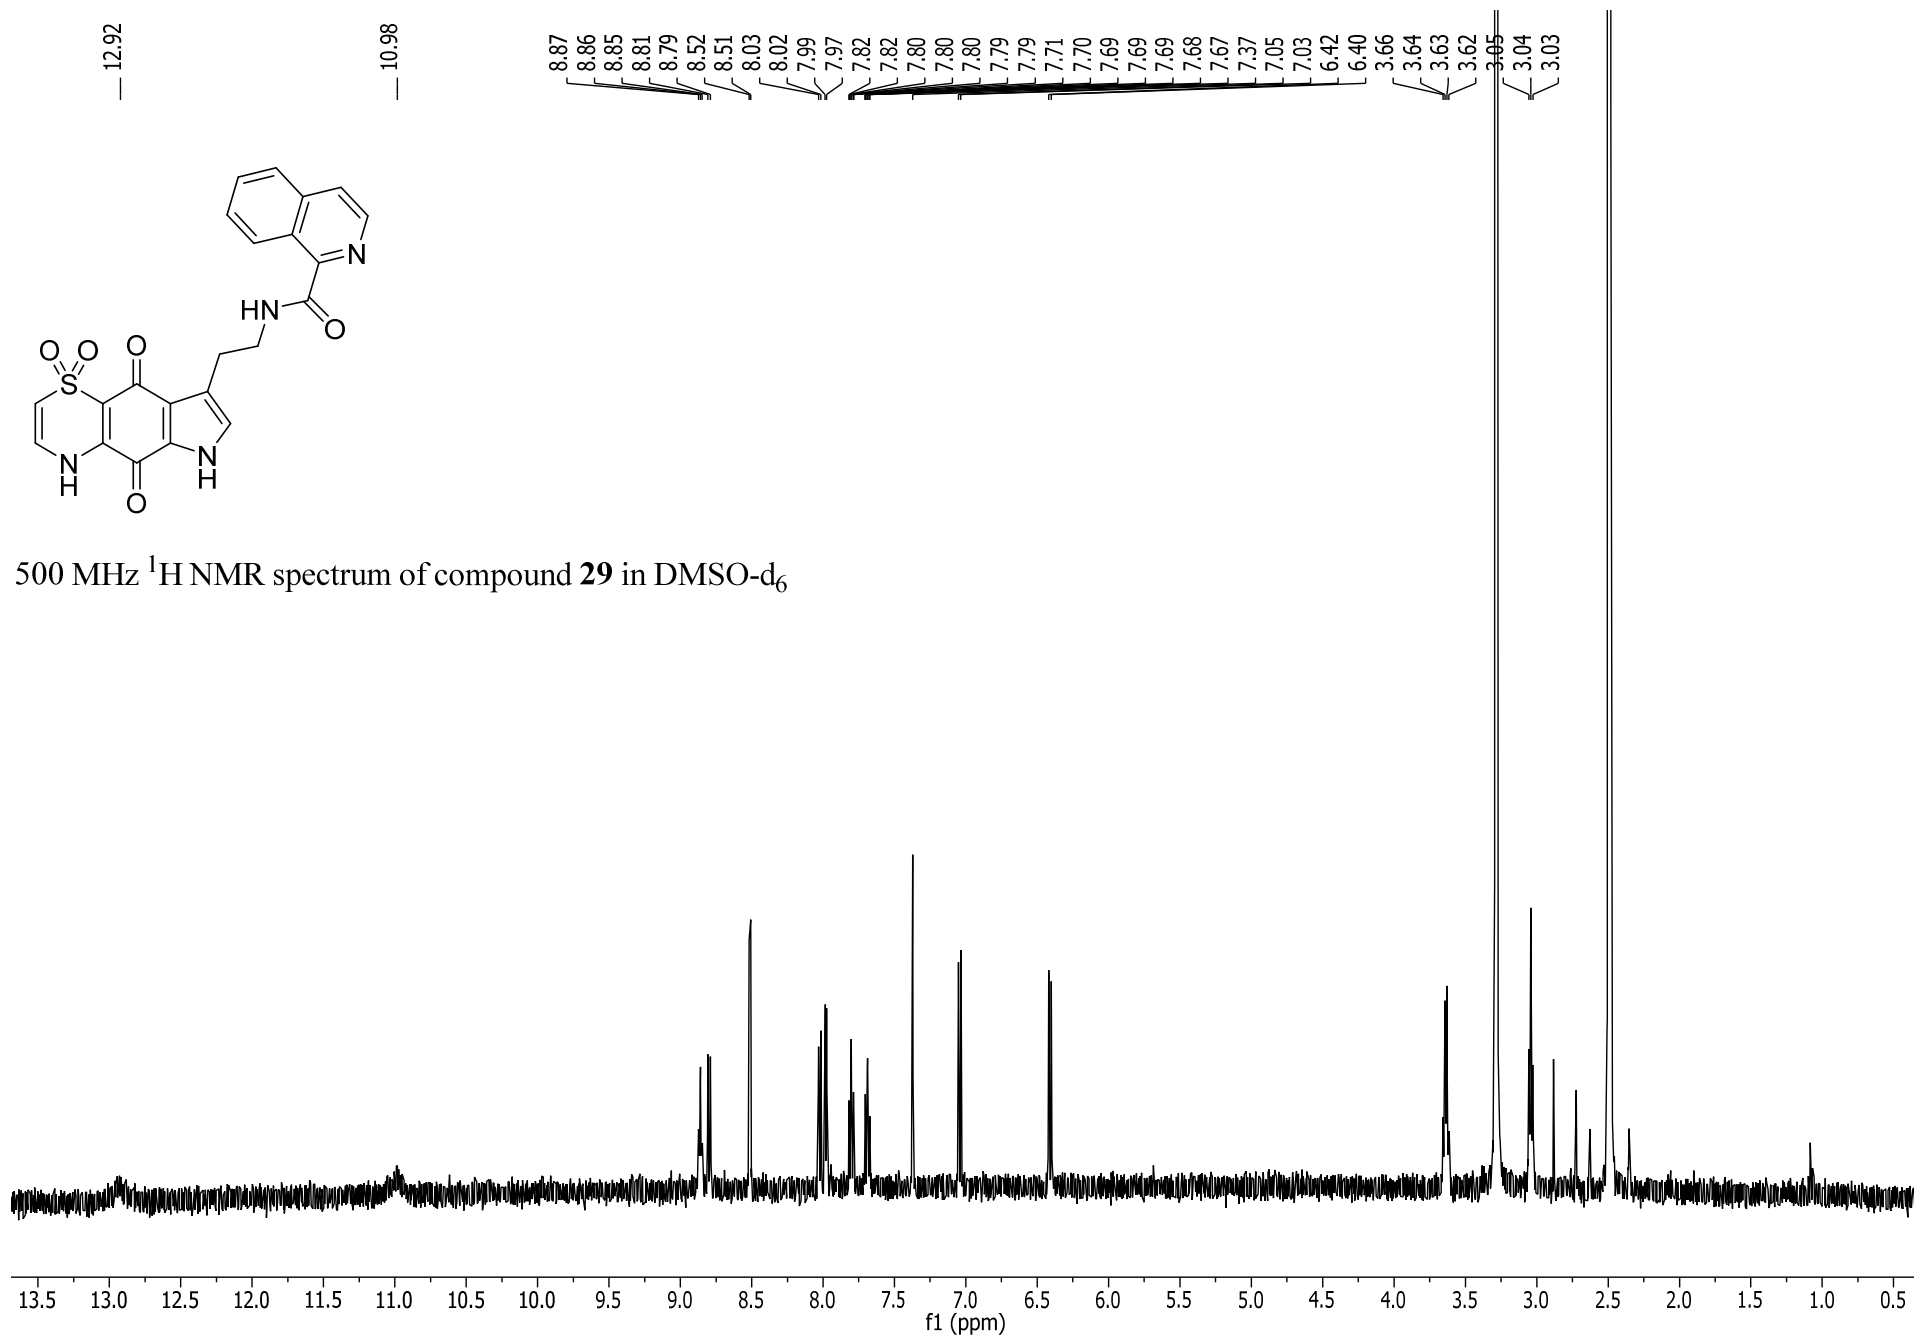

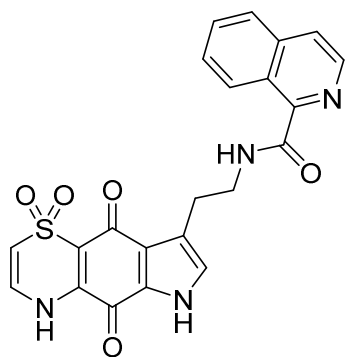

125 MHz  $^{13}\text{C}$  NMR spectrum of compound **29** in  $\text{DMSO-d}_6$

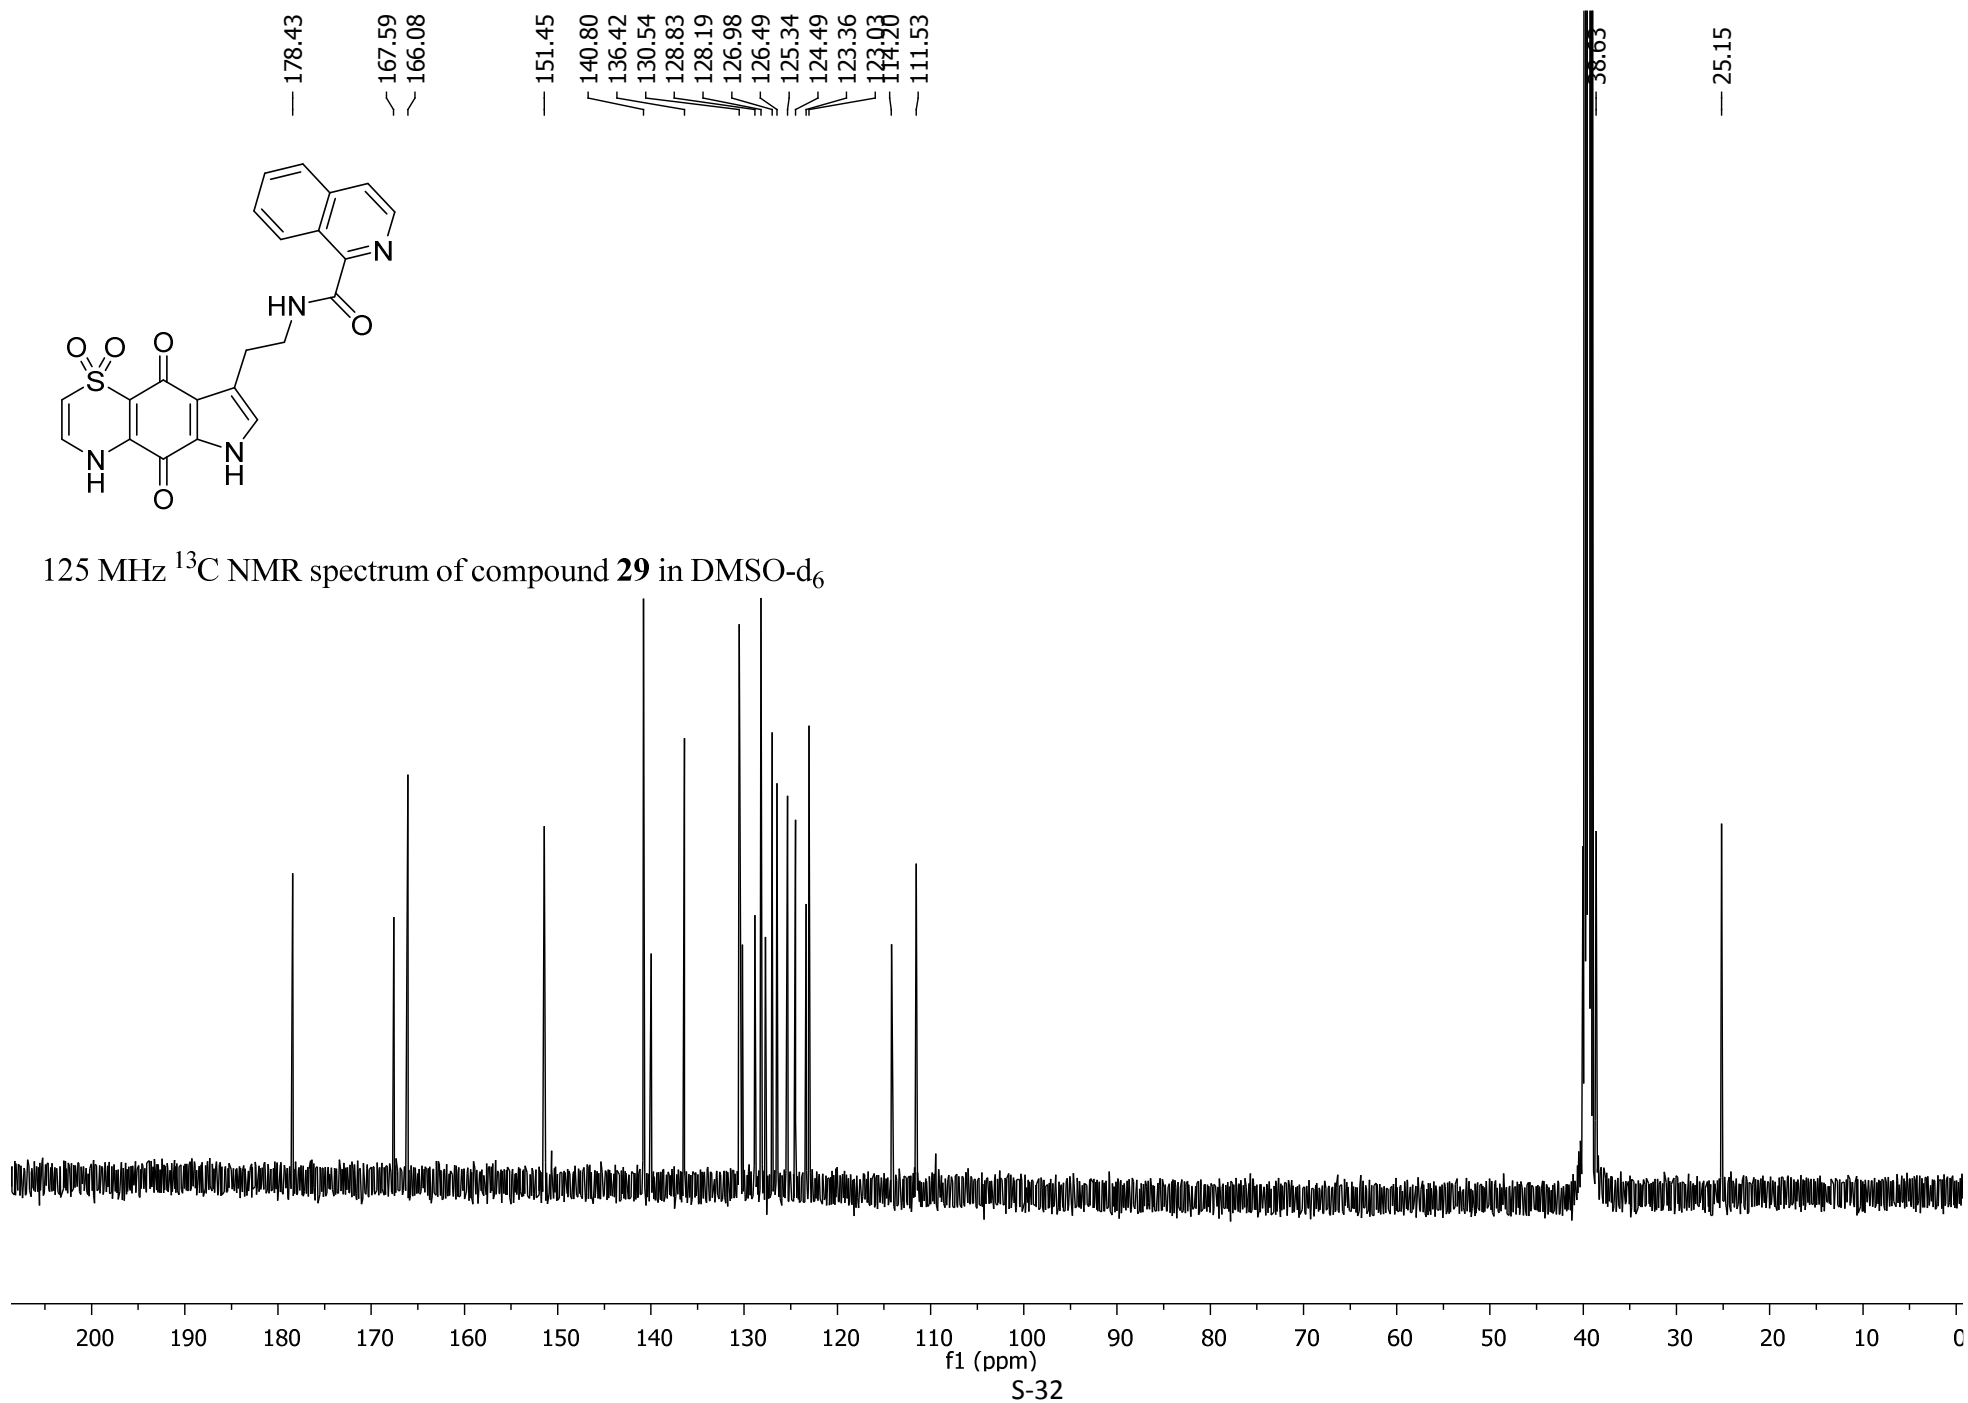



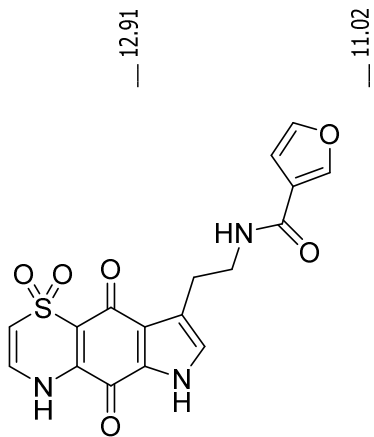

500 MHz  $^1\text{H}$  NMR spectrum of compound **30** in  $\text{DMSO-d}_6$

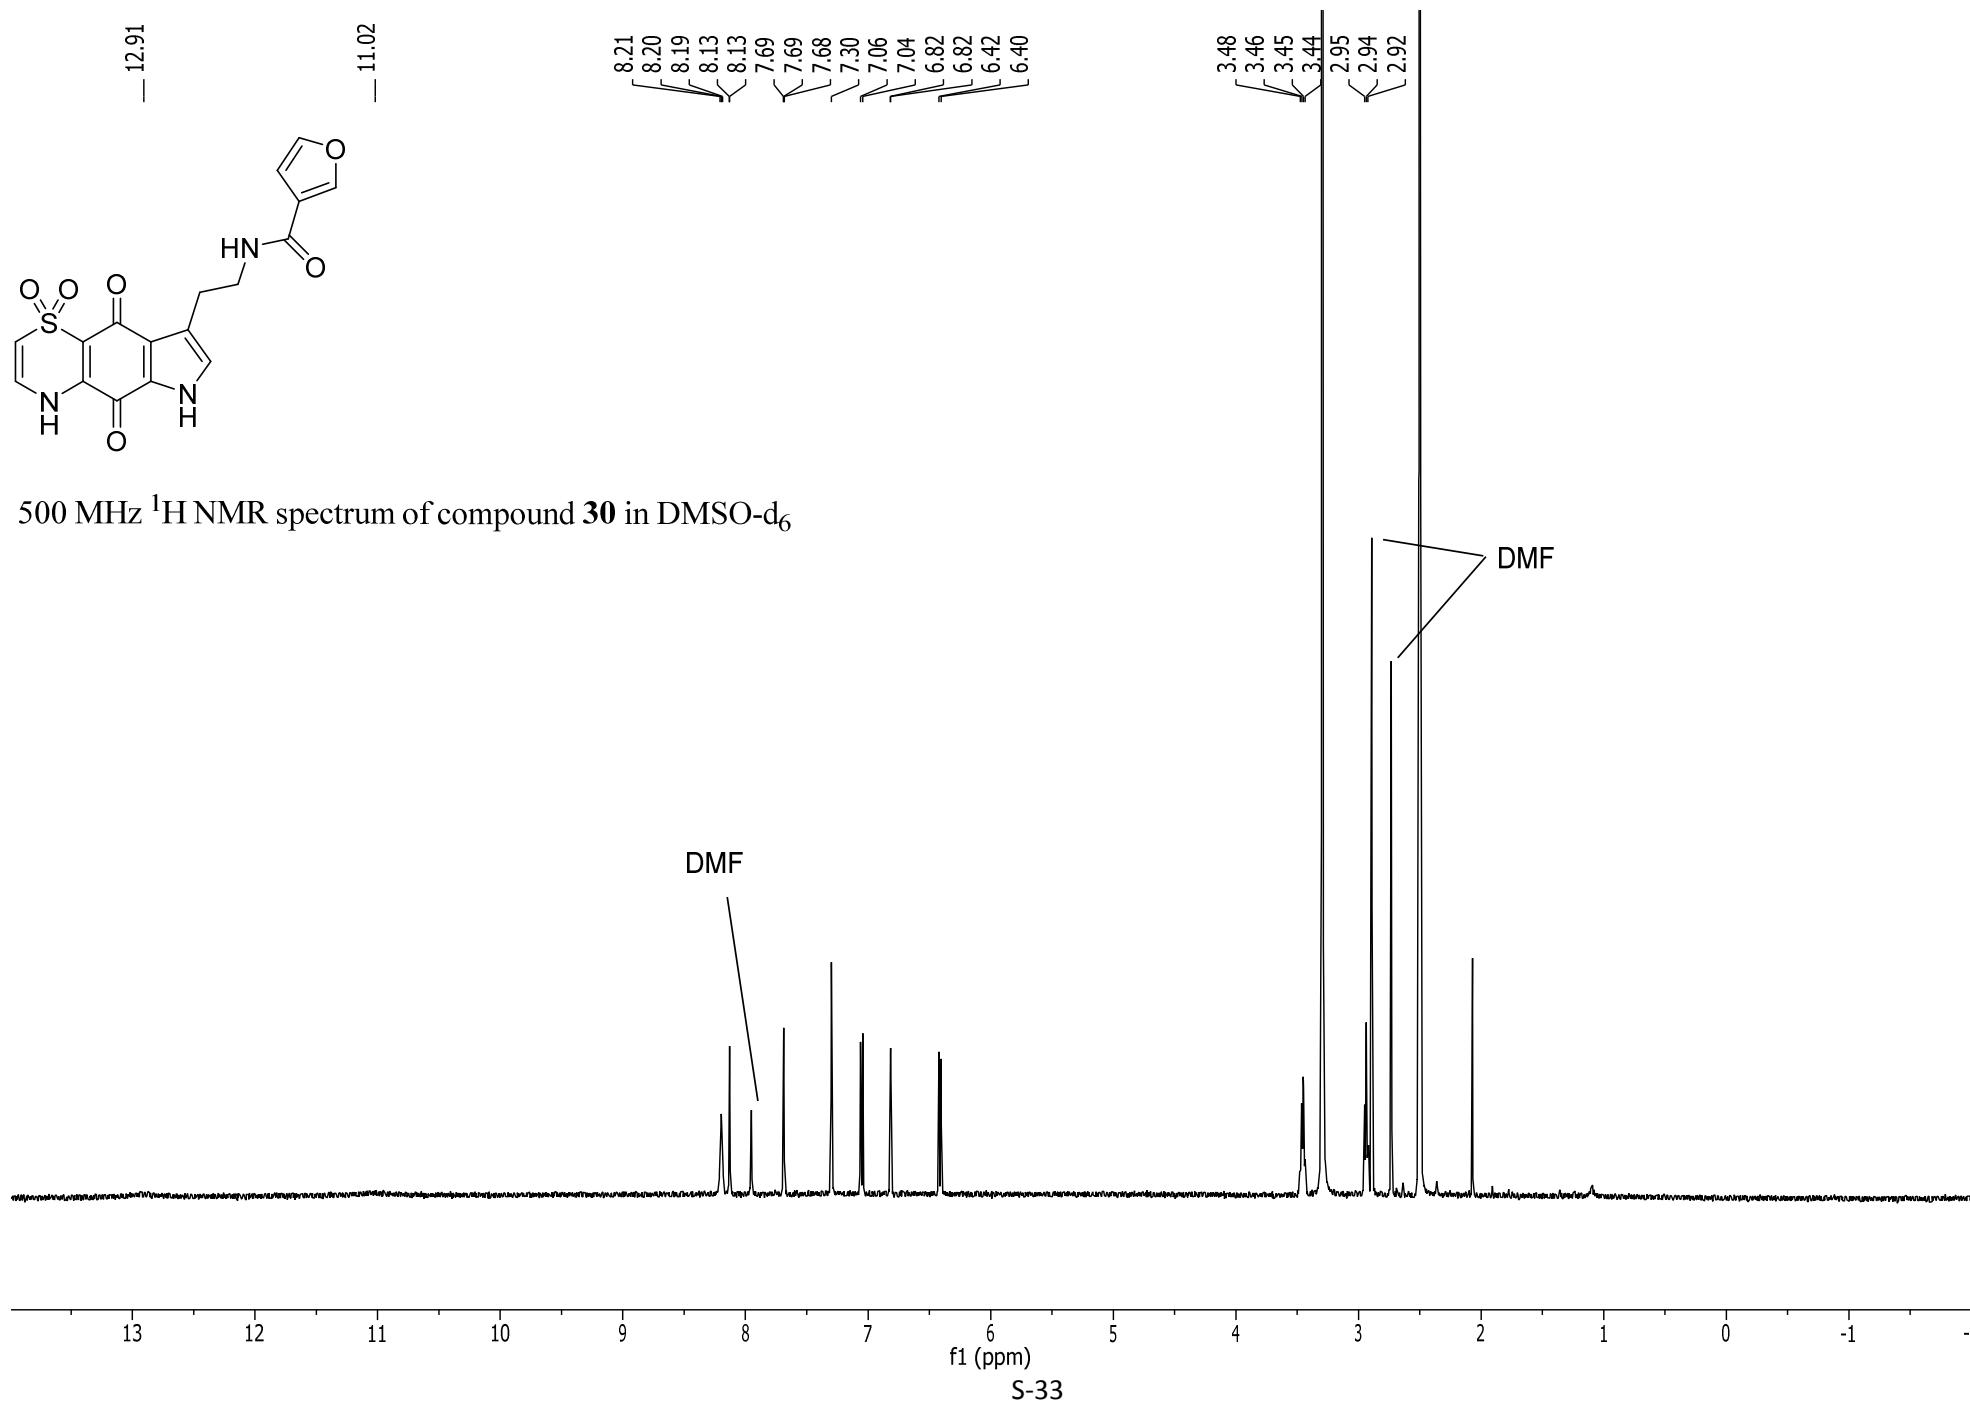

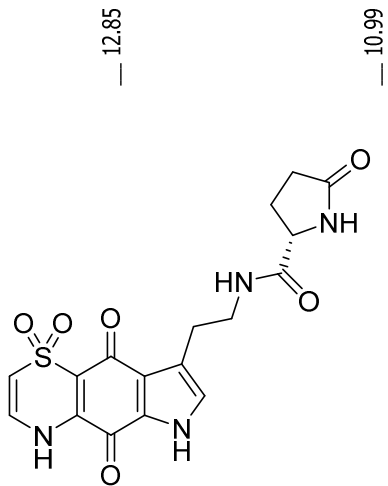

500 MHz  $^1\text{H}$  NMR spectrum of compound **31** in  $\text{DMSO-d}_6$

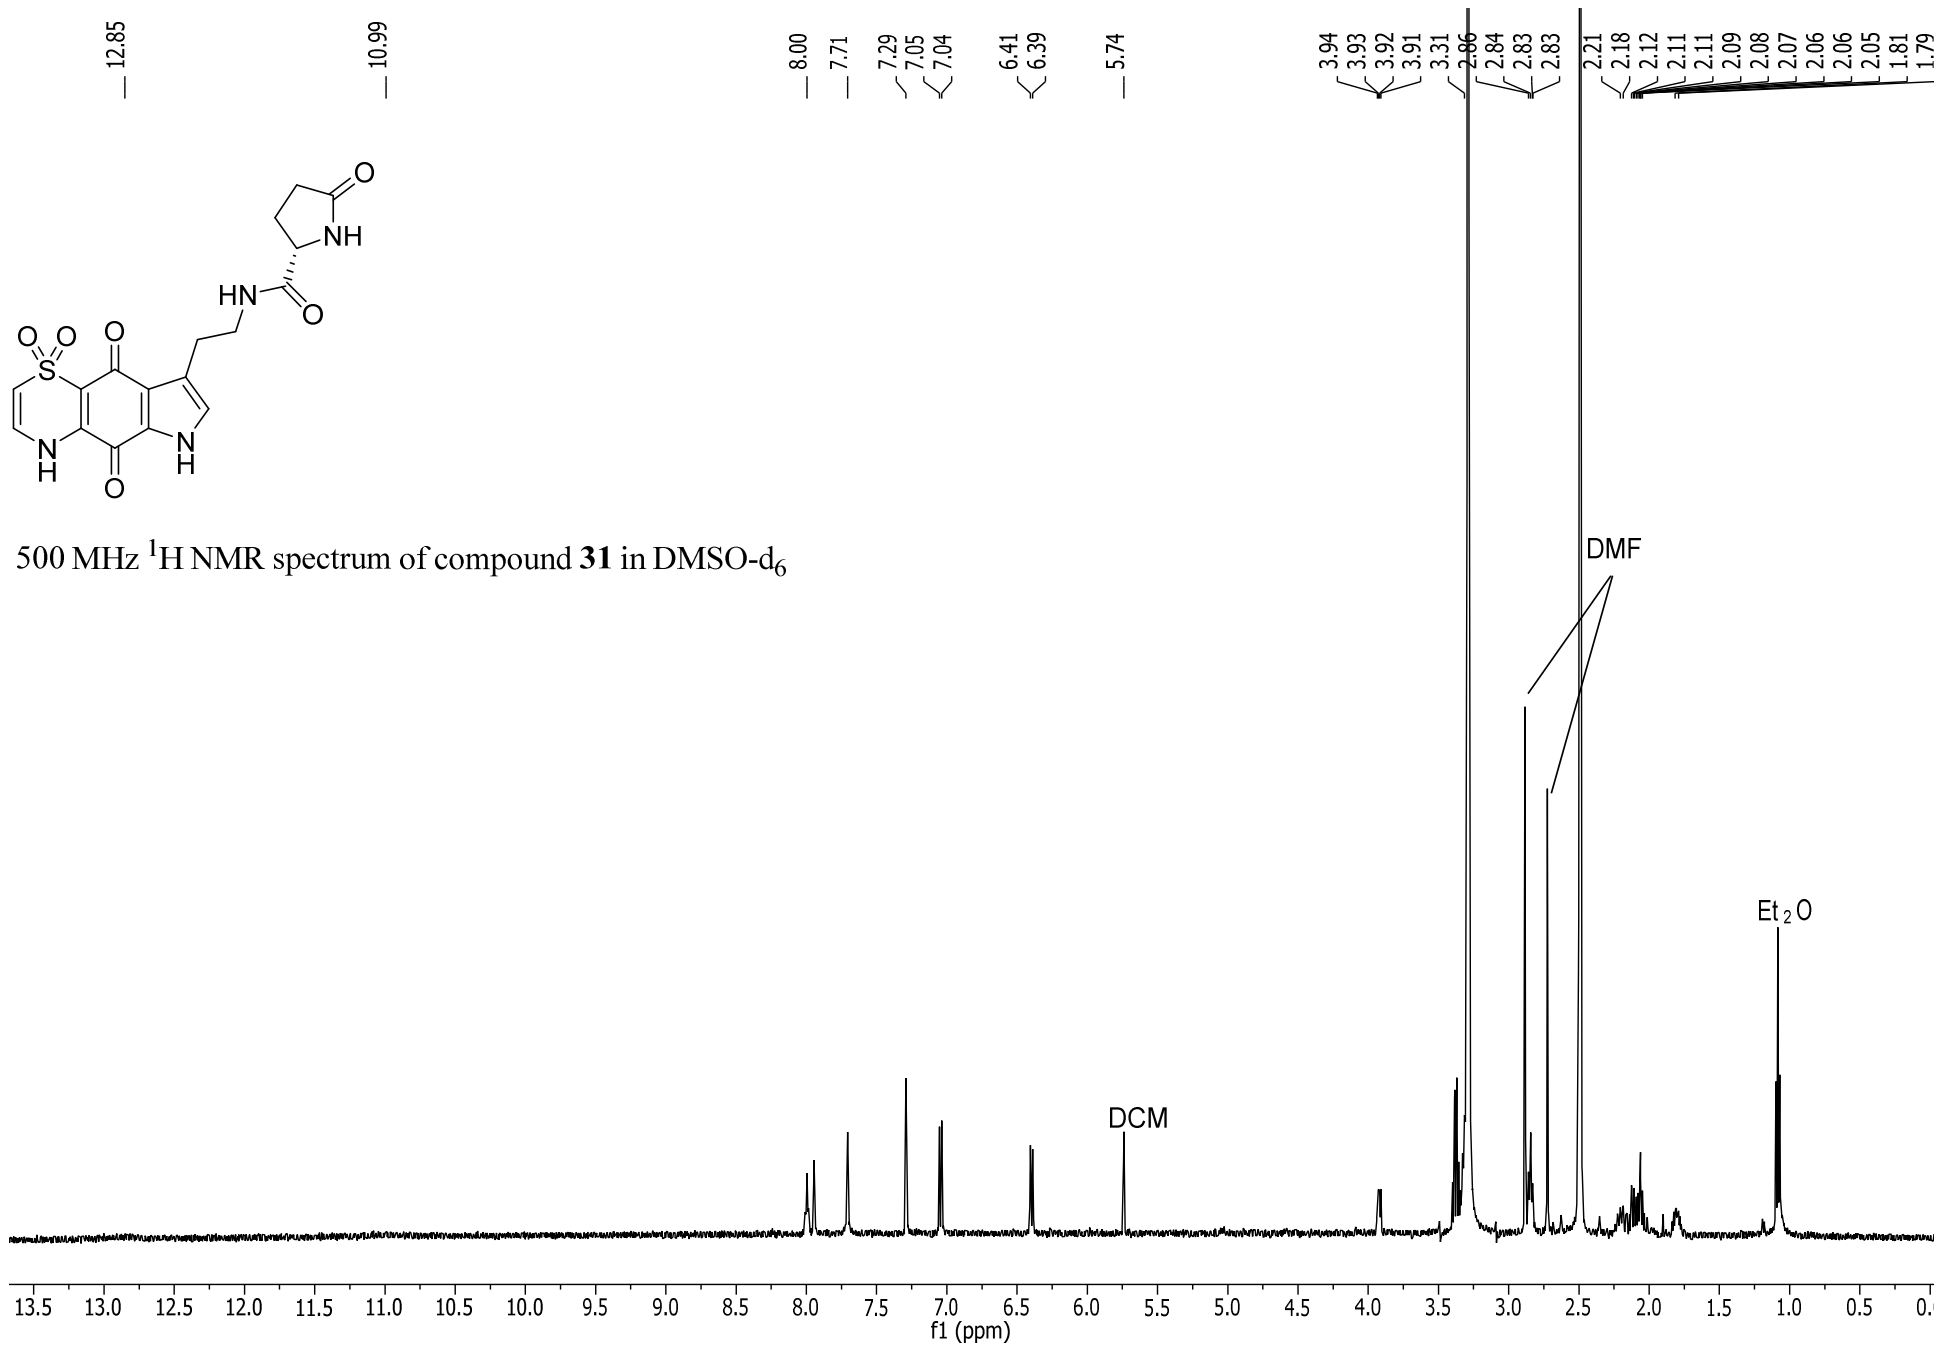

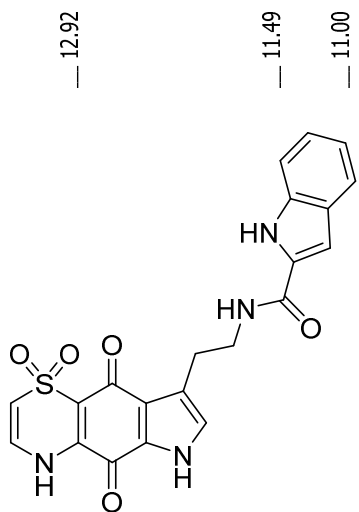

500 MHz  $^1\text{H}$  NMR spectrum of compound **32** in  $\text{DMSO-d}_6$

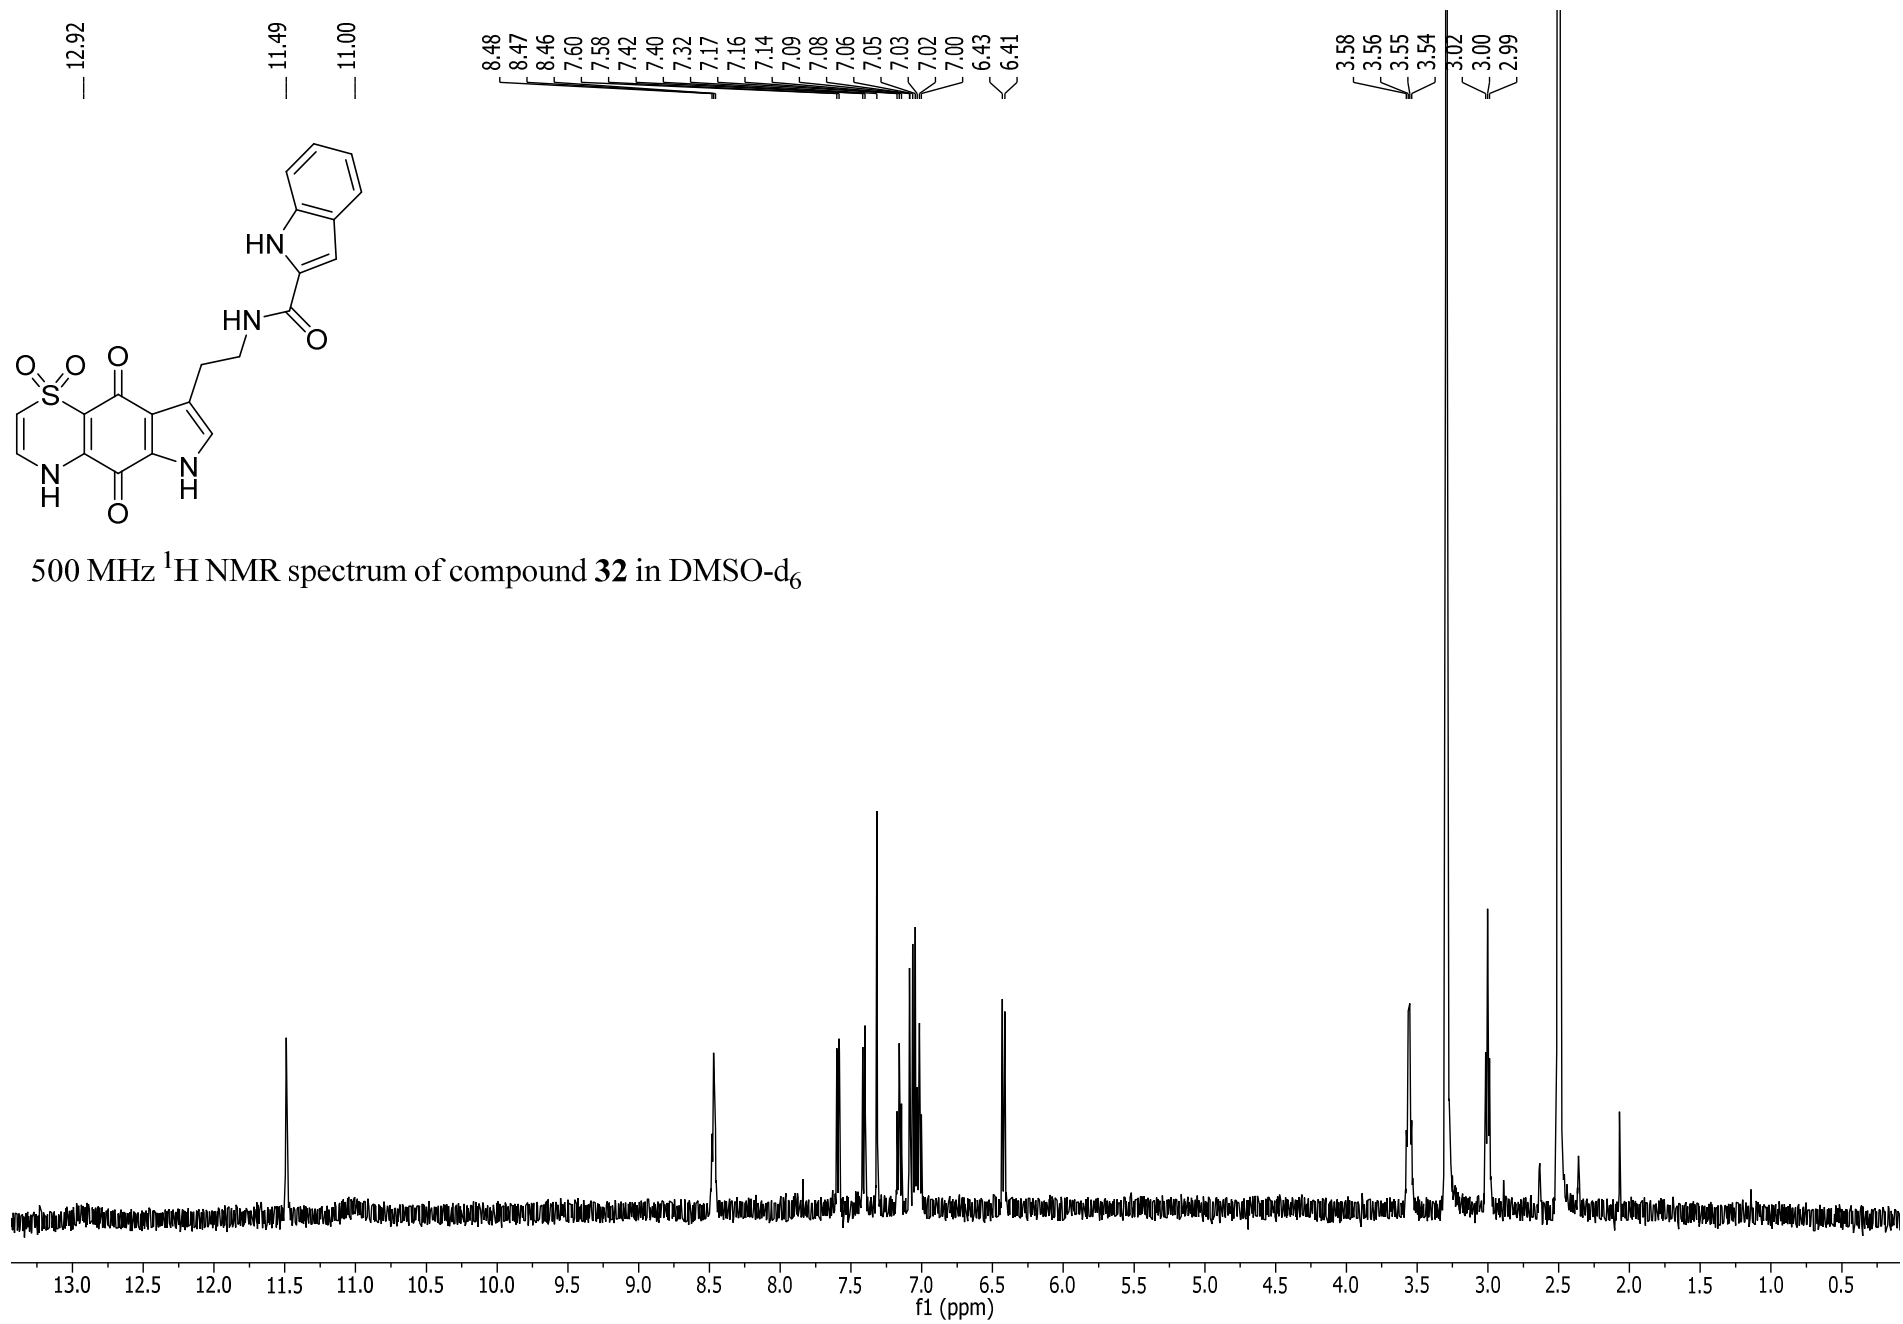

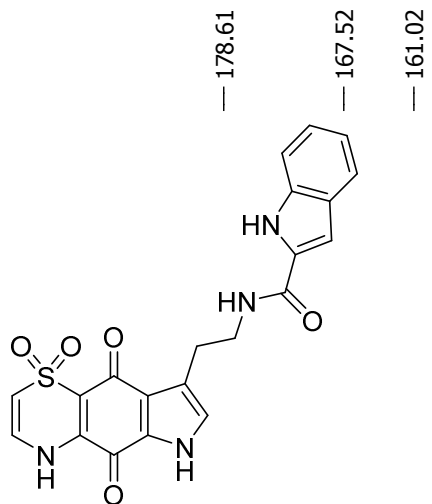

125 MHz  $^{13}\text{C}$  NMR spectrum of compound **32** in  $\text{DMSO-d}_6$

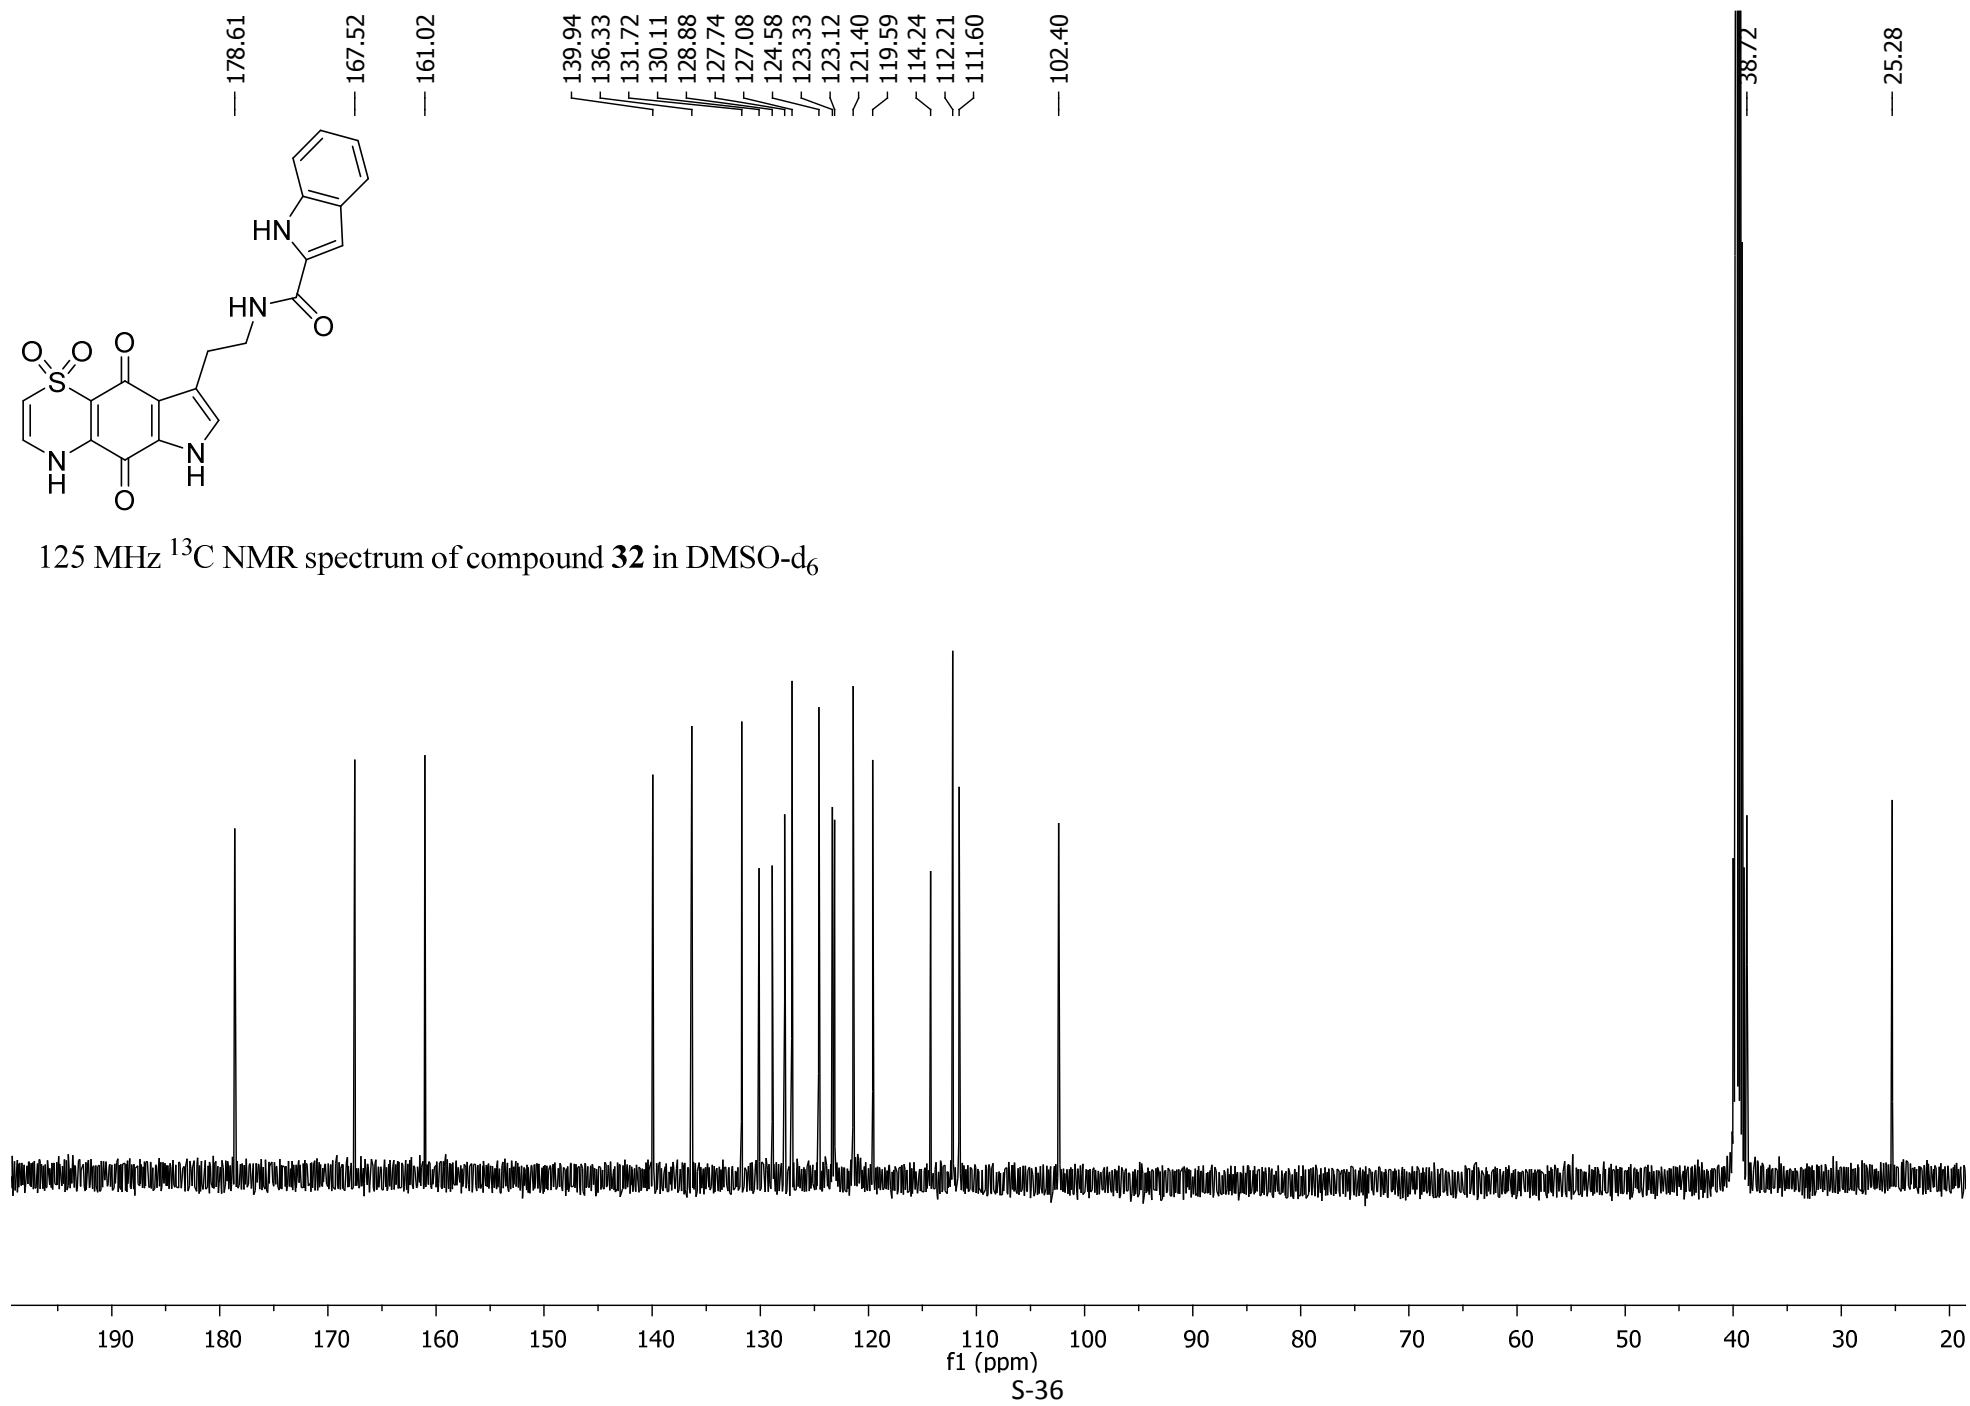

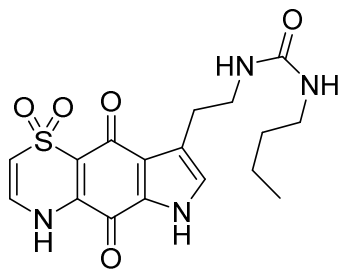

500 MHz  $^1\text{H}$  NMR spectrum of compound **33** in  $\text{DMSO-d}_6$

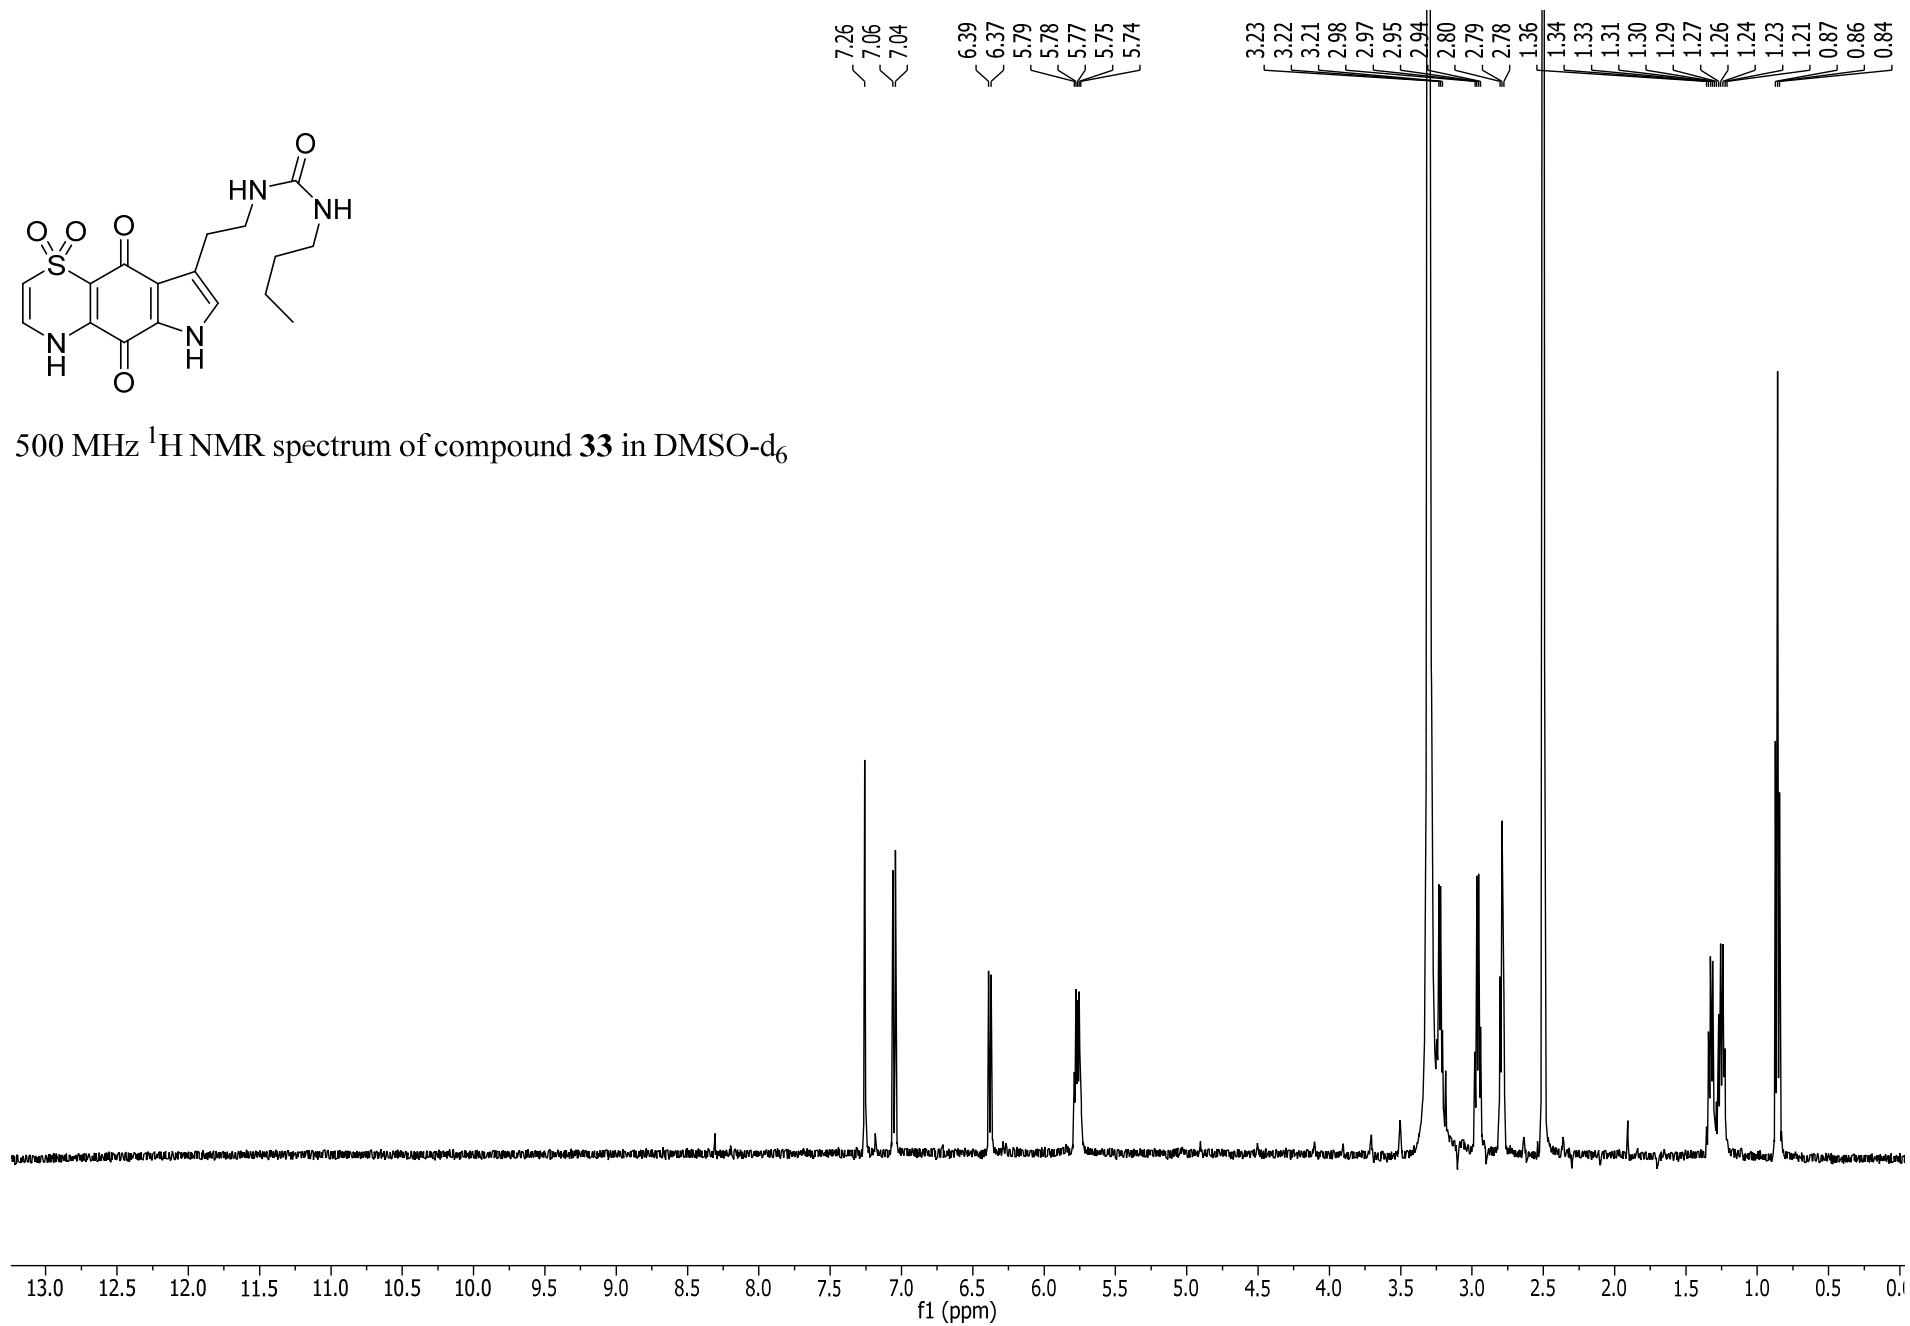

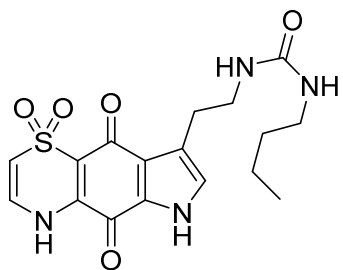

125 MHz  $^{13}\text{C}$  NMR spectrum of compound **33** in  $\text{DMSO-d}_6$

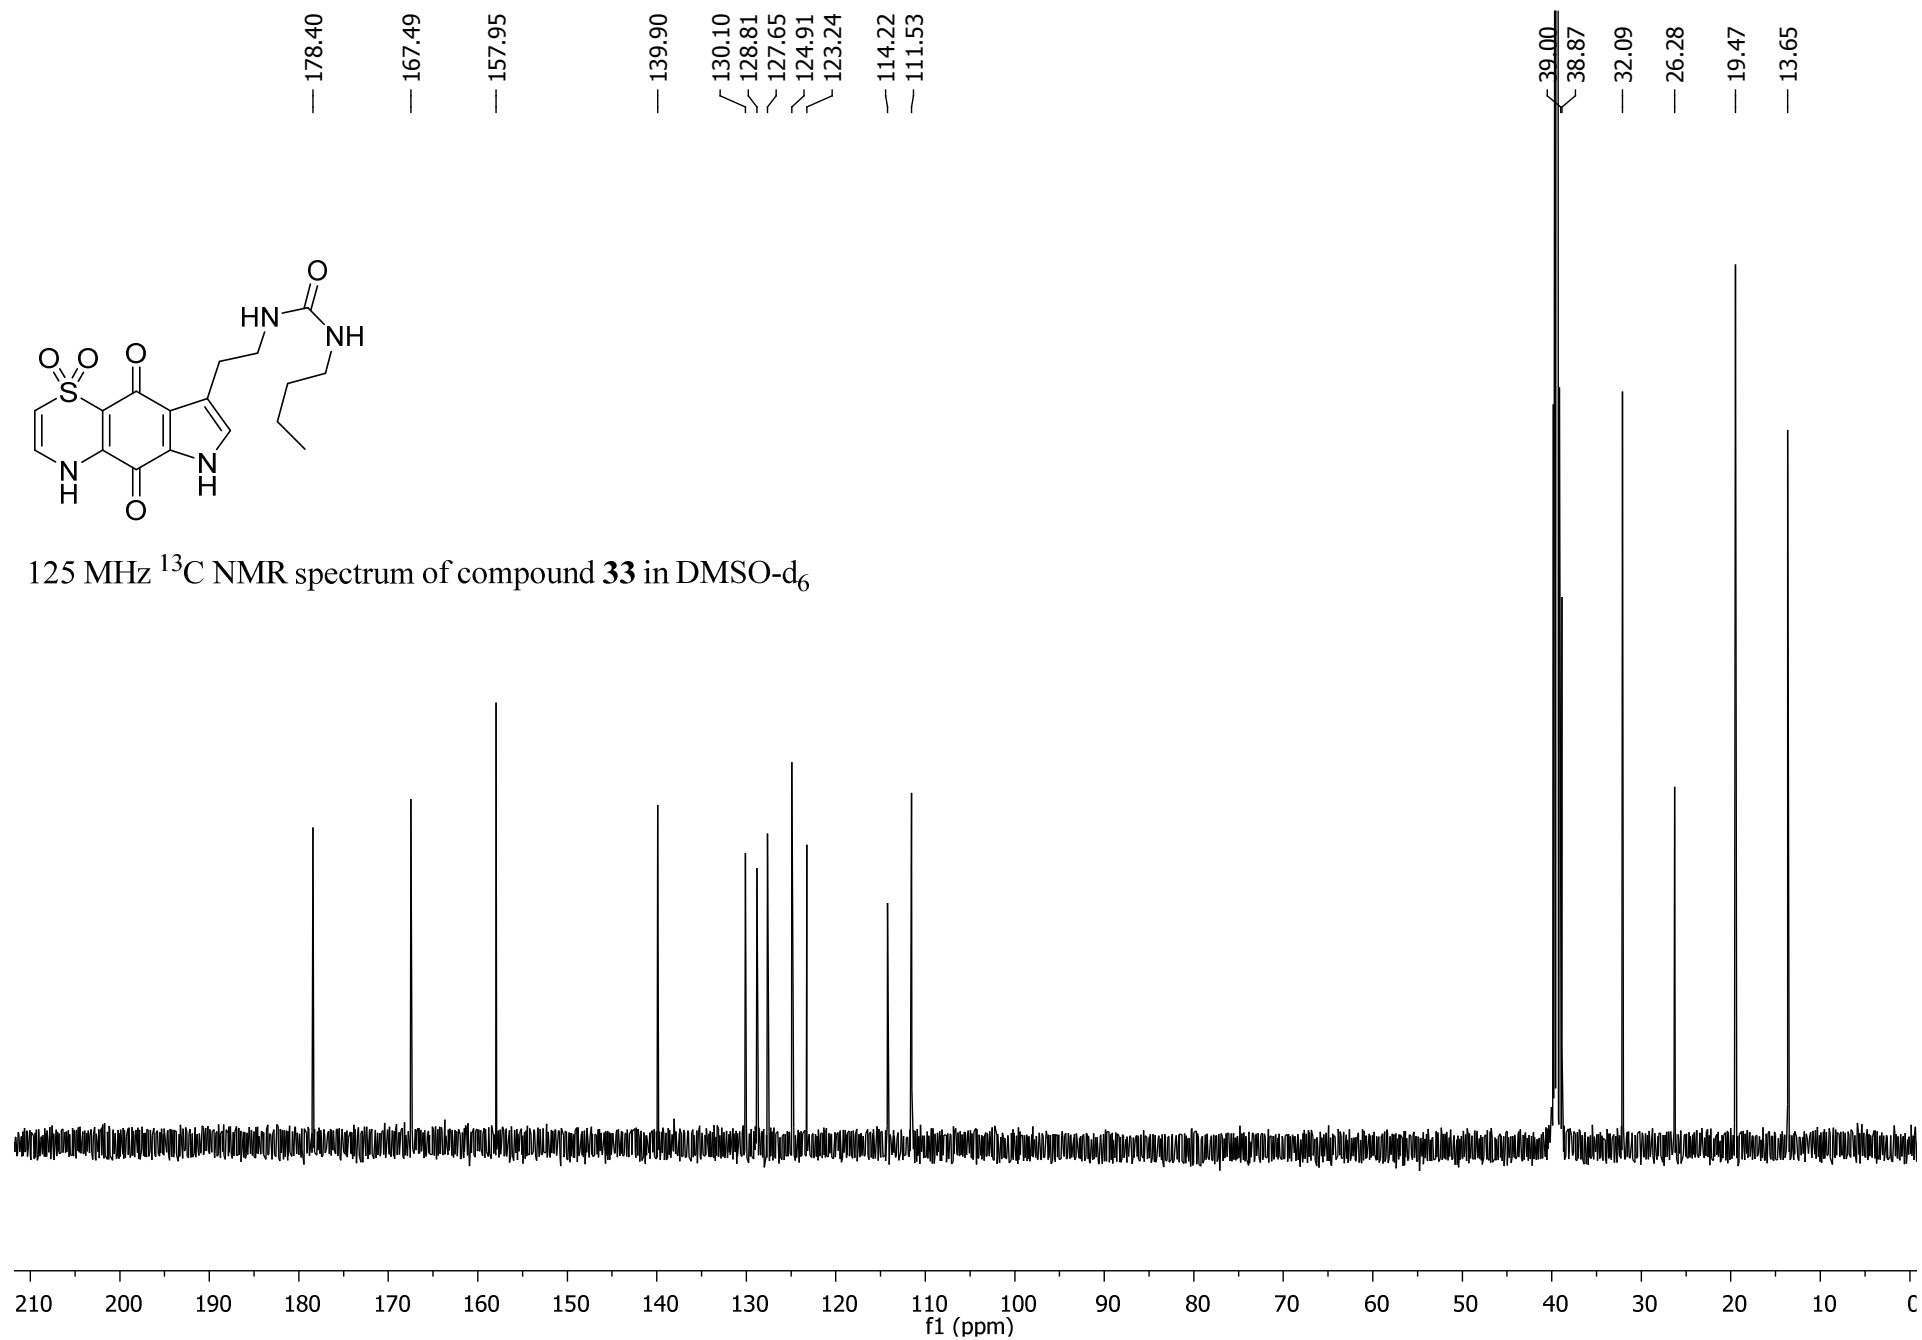

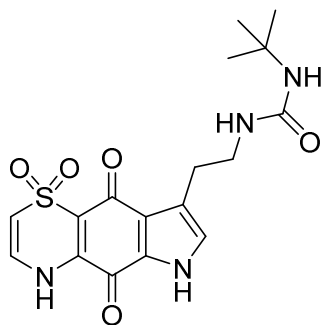

500 MHz  $^1\text{H}$  NMR spectrum of compound **34** in  $\text{DMSO-d}_6$

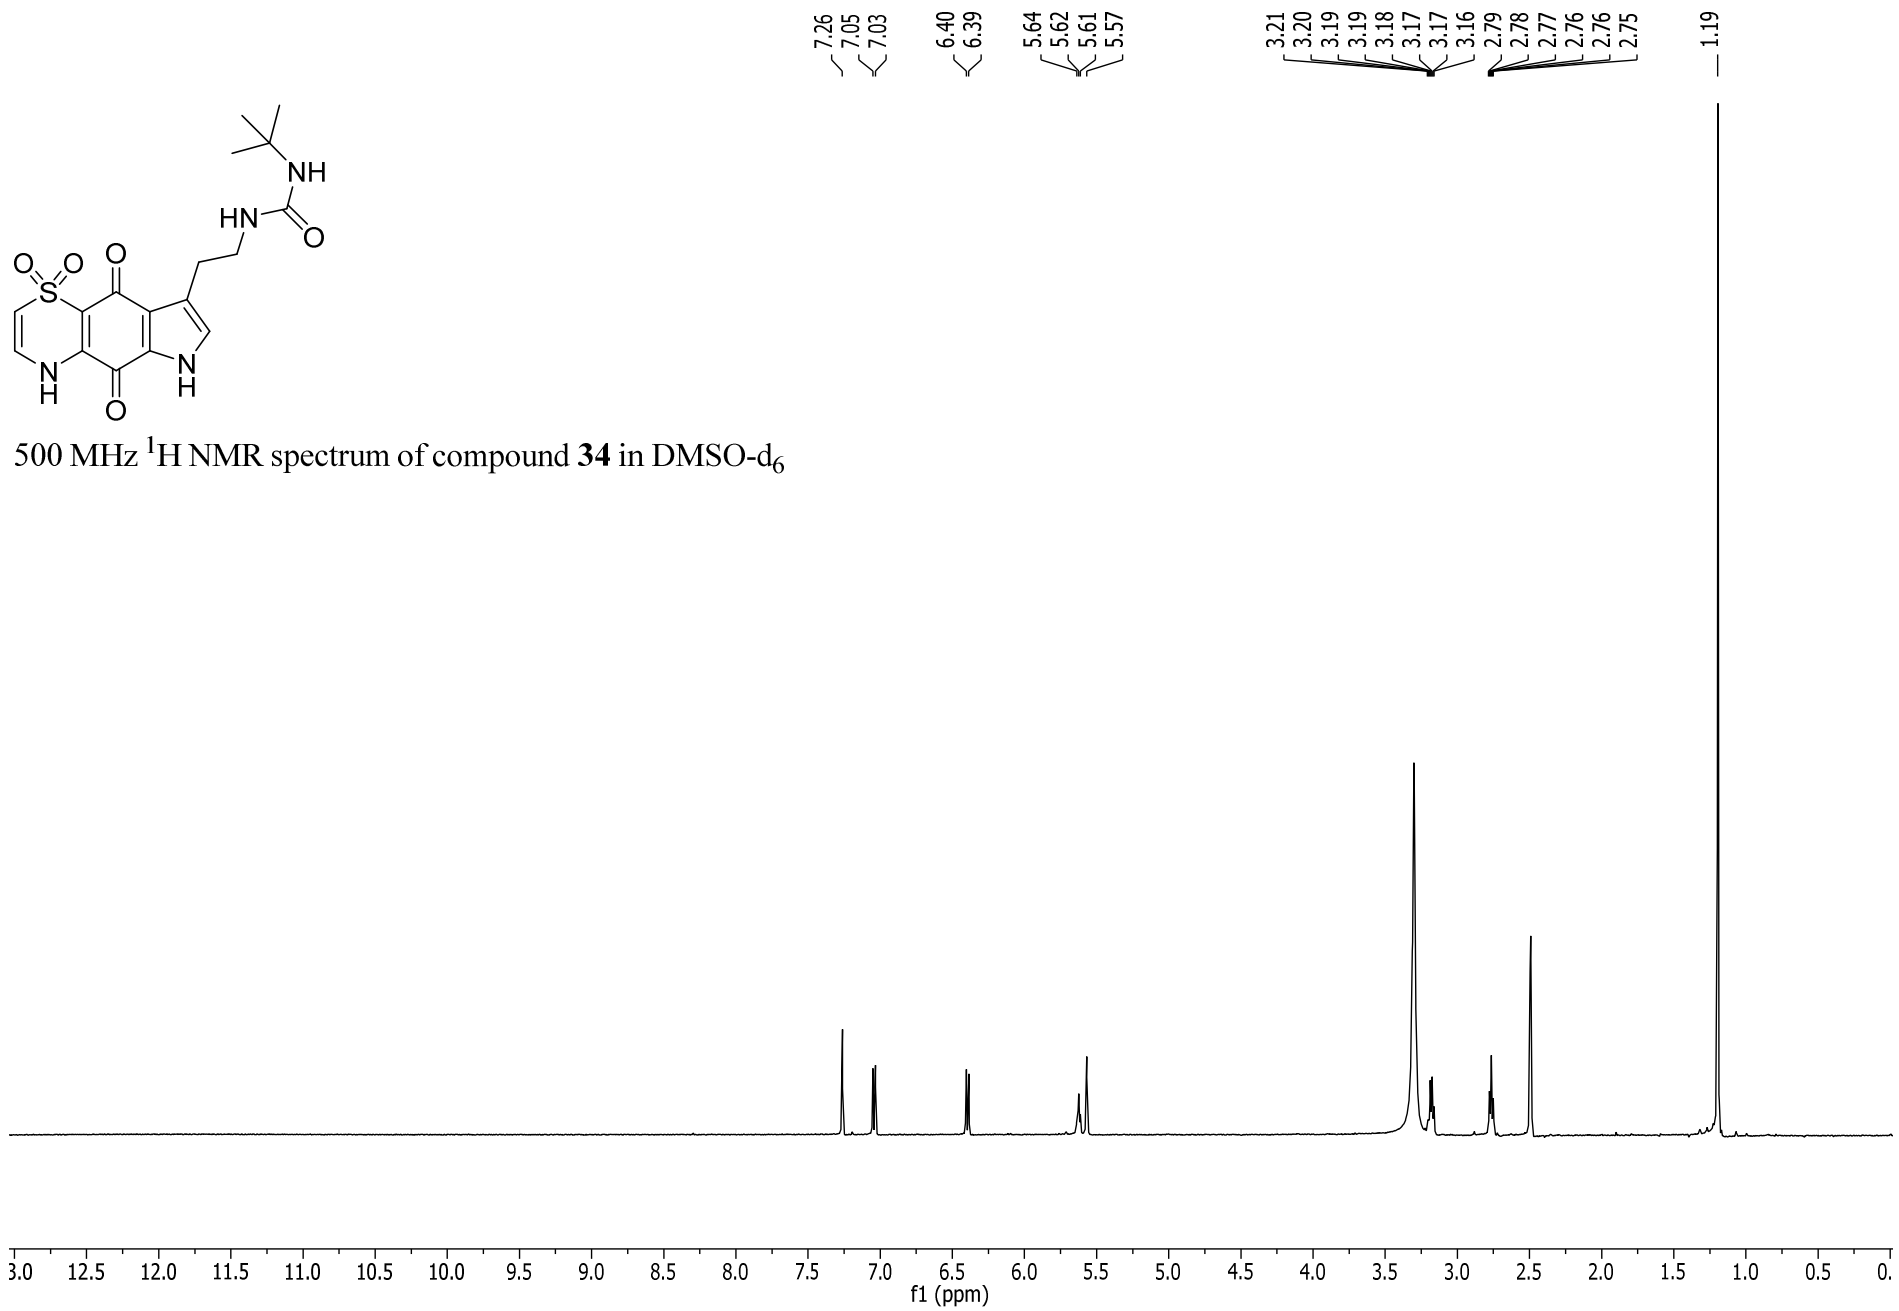

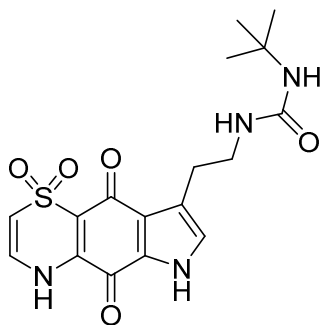

125 MHz  $^{13}\text{C}$  NMR spectrum of compound **34** in  $\text{DMSO-d}_6$

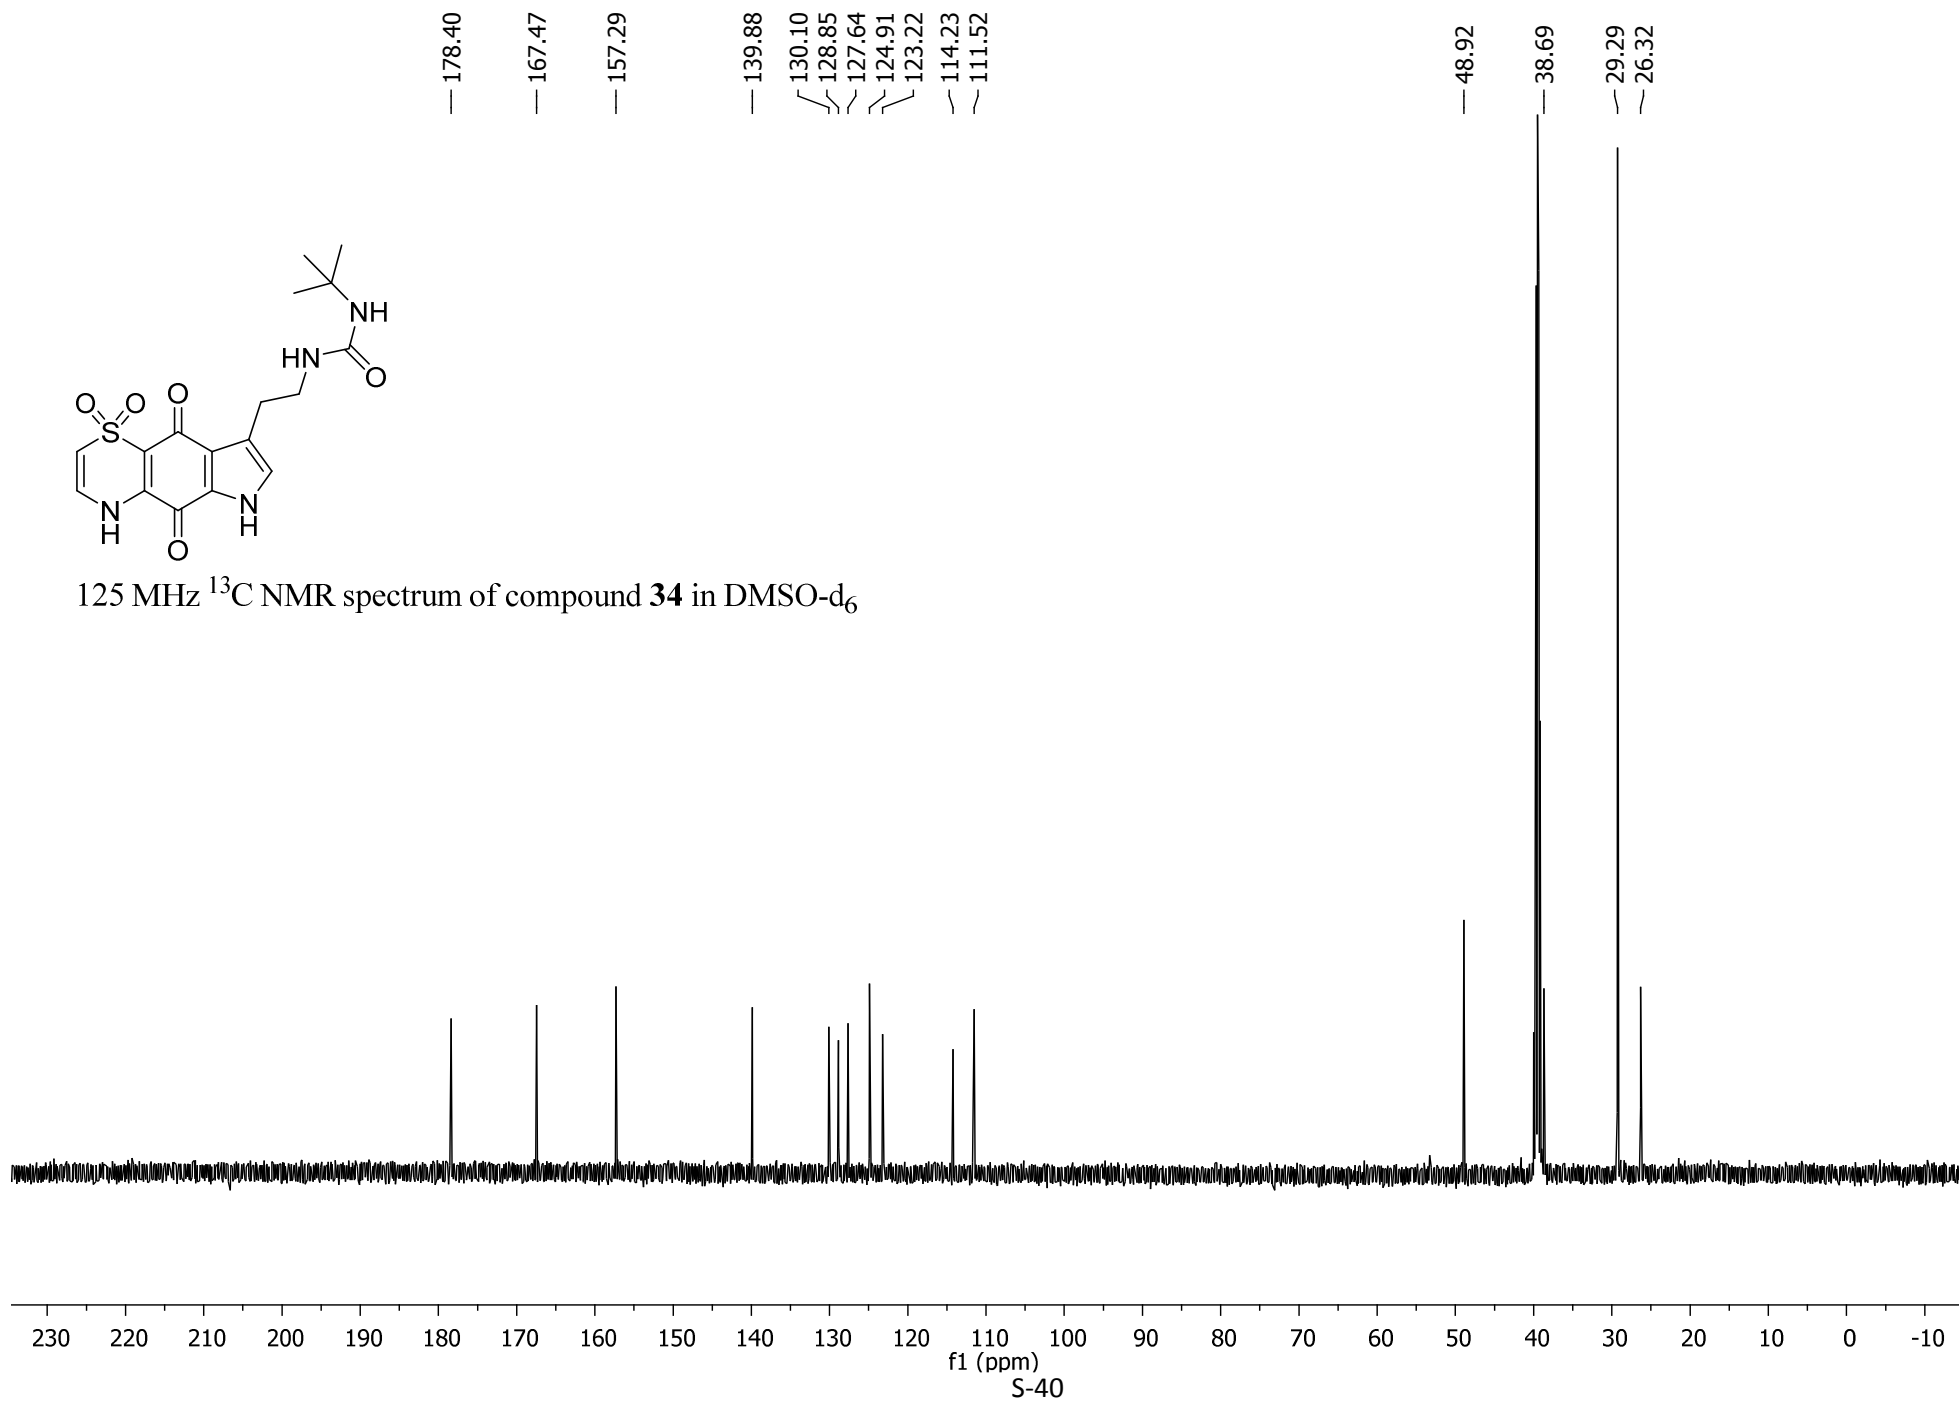



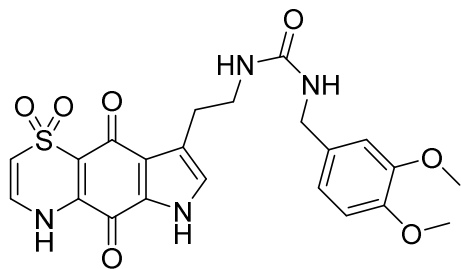

500 MHz  $^1\text{H}$  NMR spectrum of compound **36** in  $\text{DMSO-d}_6$

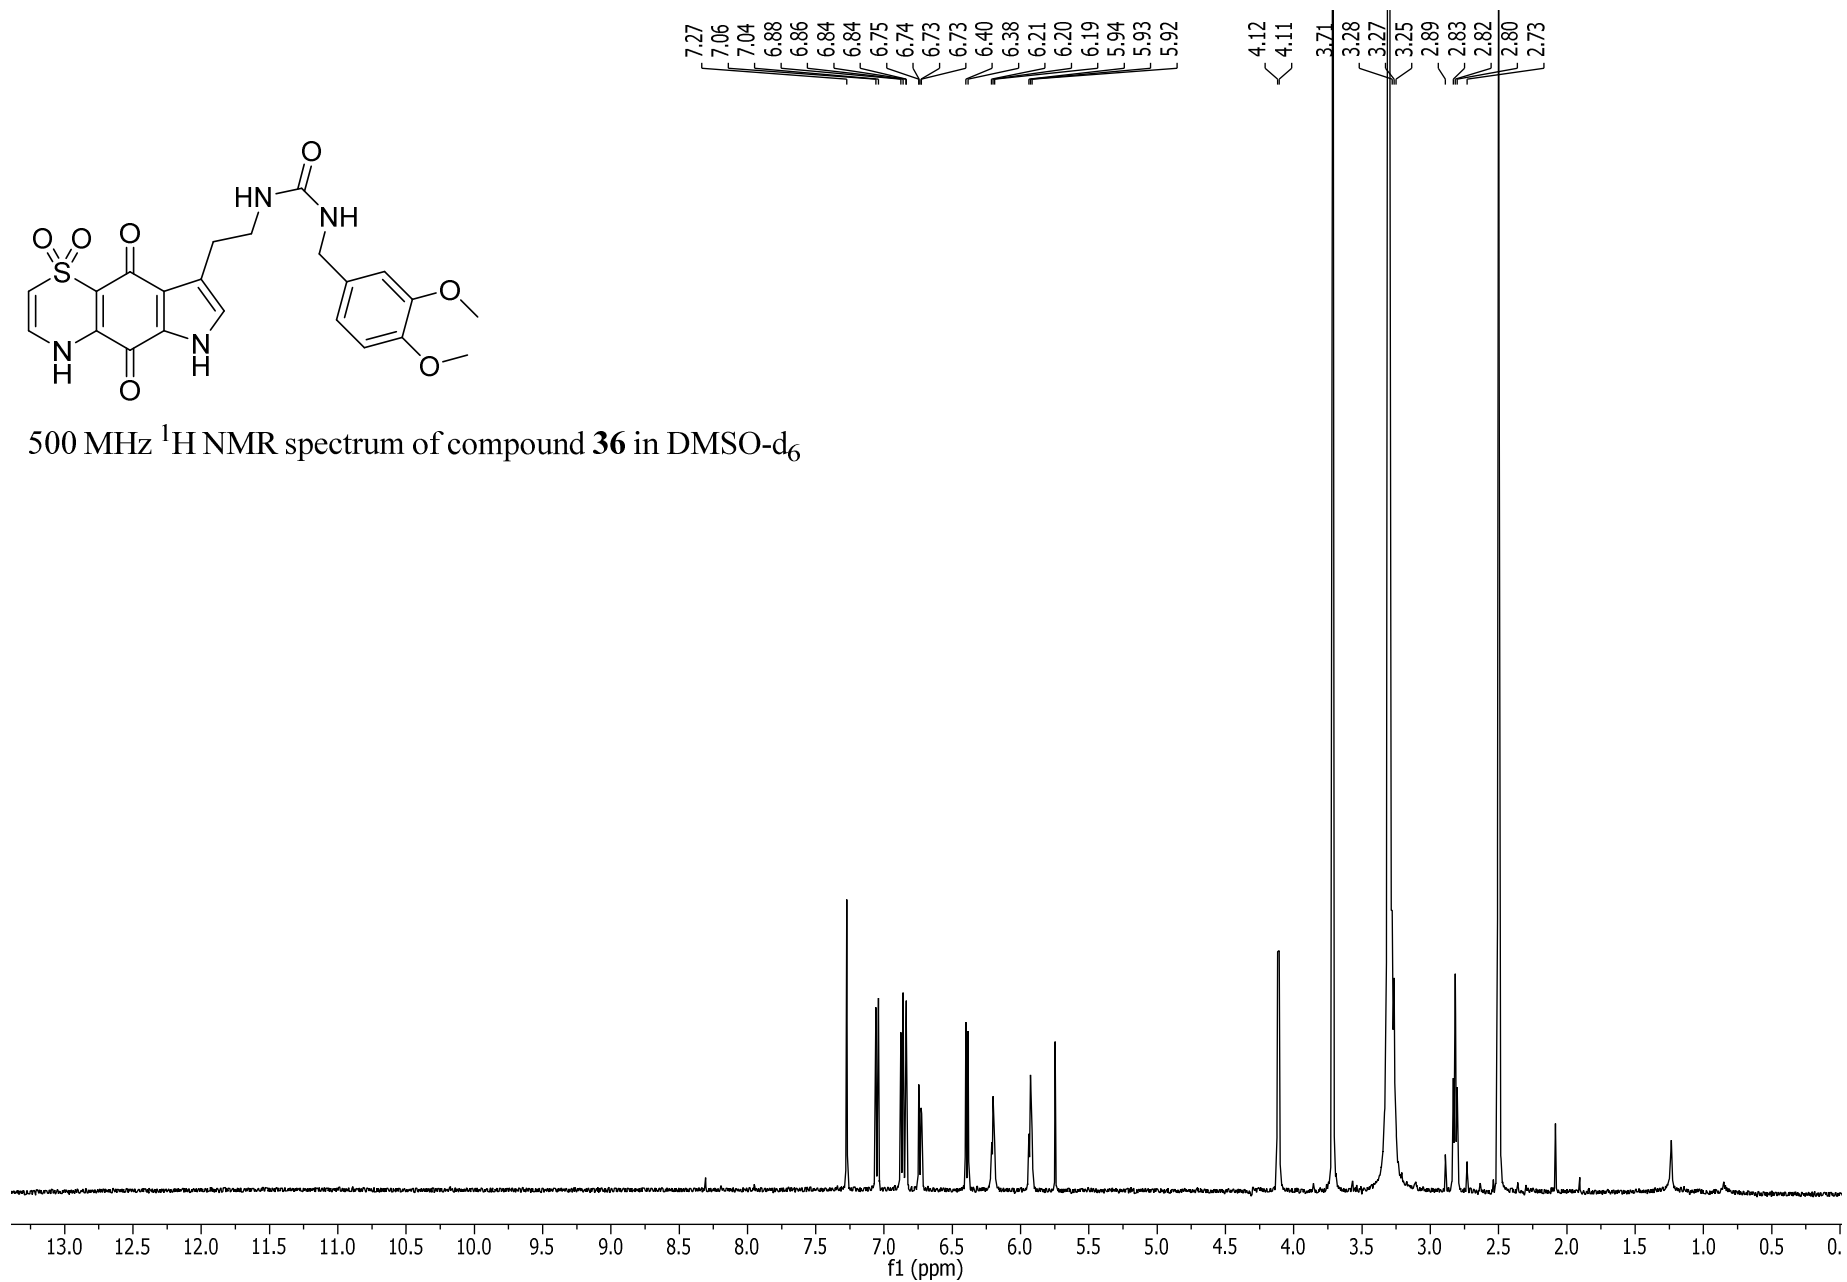

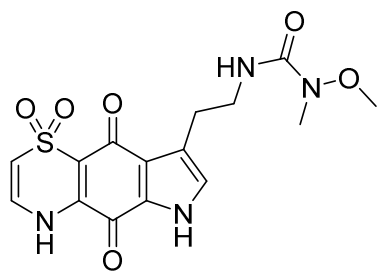

500 MHz  $^1\text{H}$  NMR spectrum of compound **37** in  $\text{DMSO-d}_6$

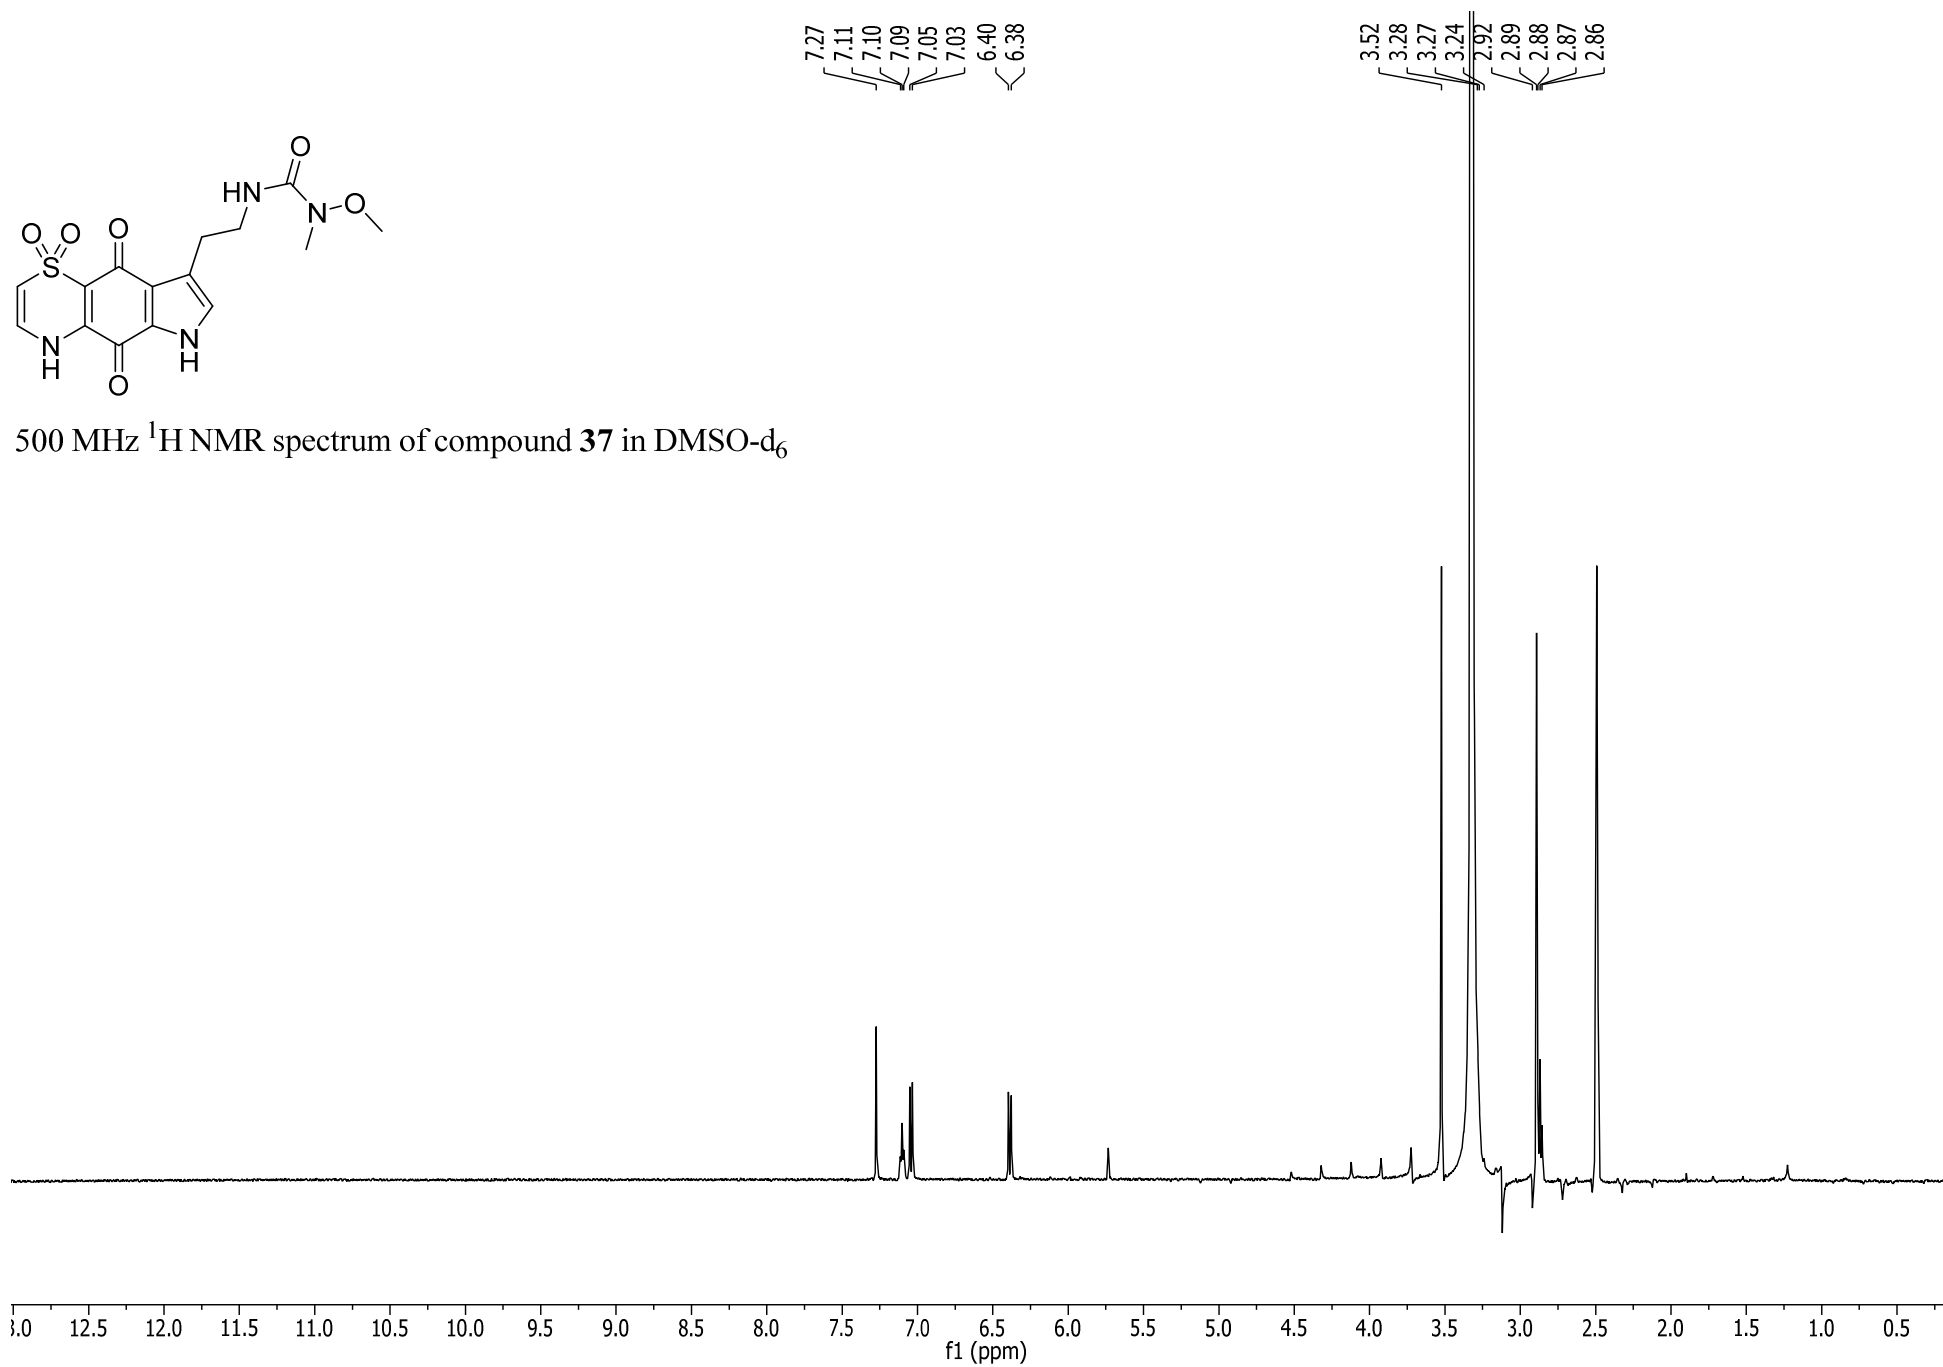

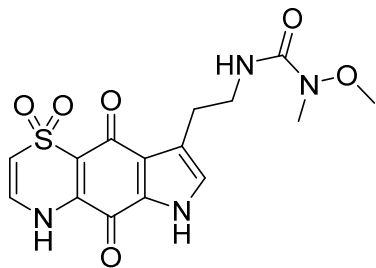

125 MHz  $^{13}\text{C}$  spectrum of compound **37** in  $\text{DMSO-d}_6$

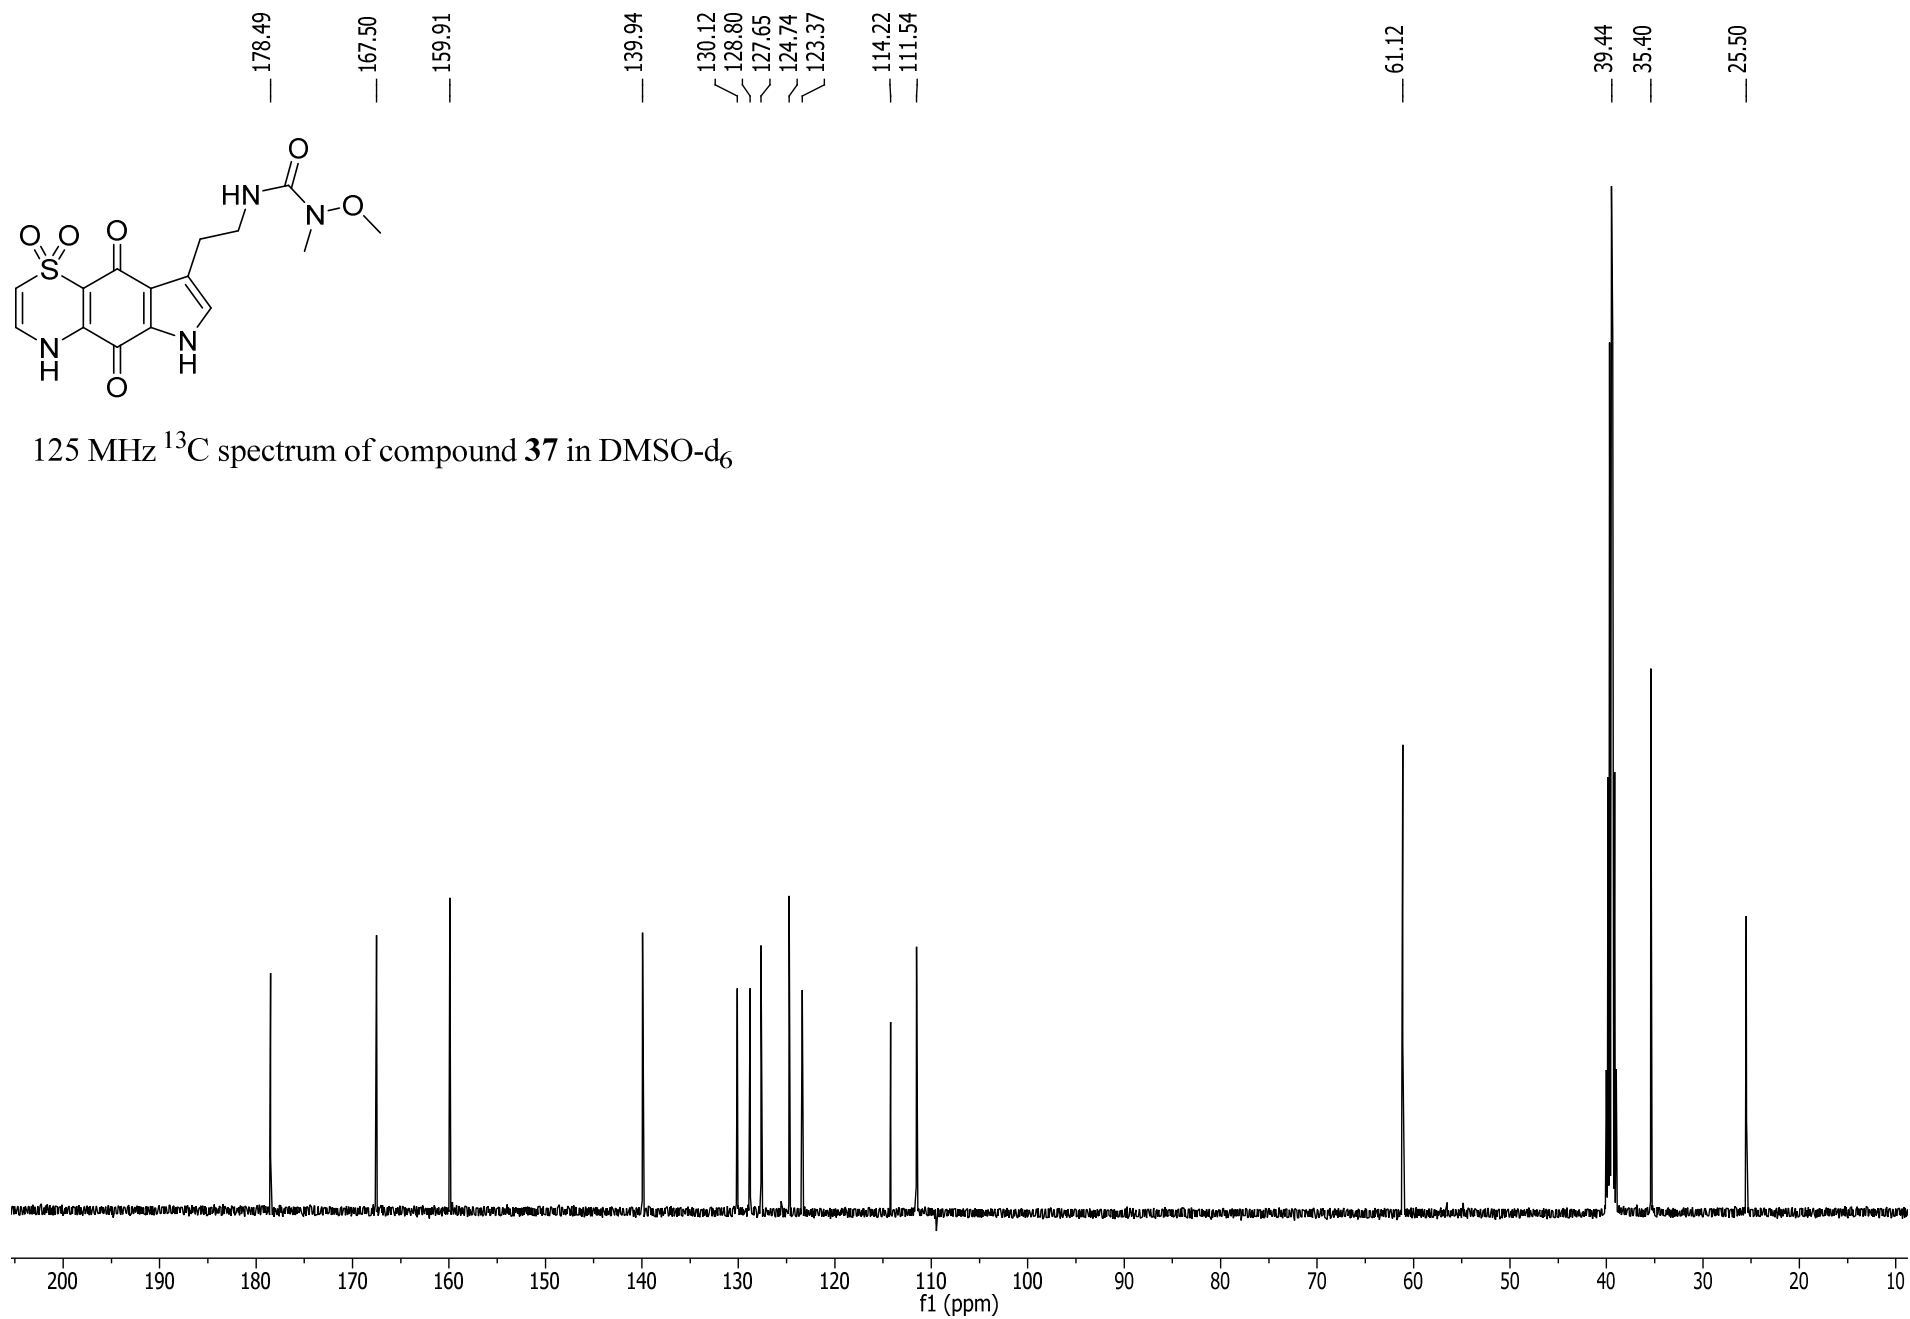

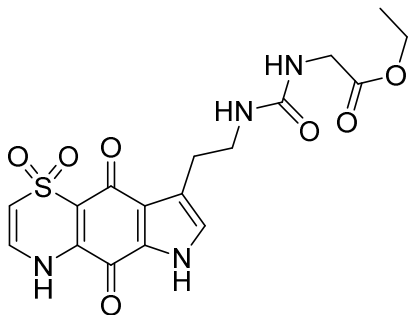

500 MHz  $^1\text{H}$  NMR spectrum of compound **38** in DMSO- $\text{d}_6$

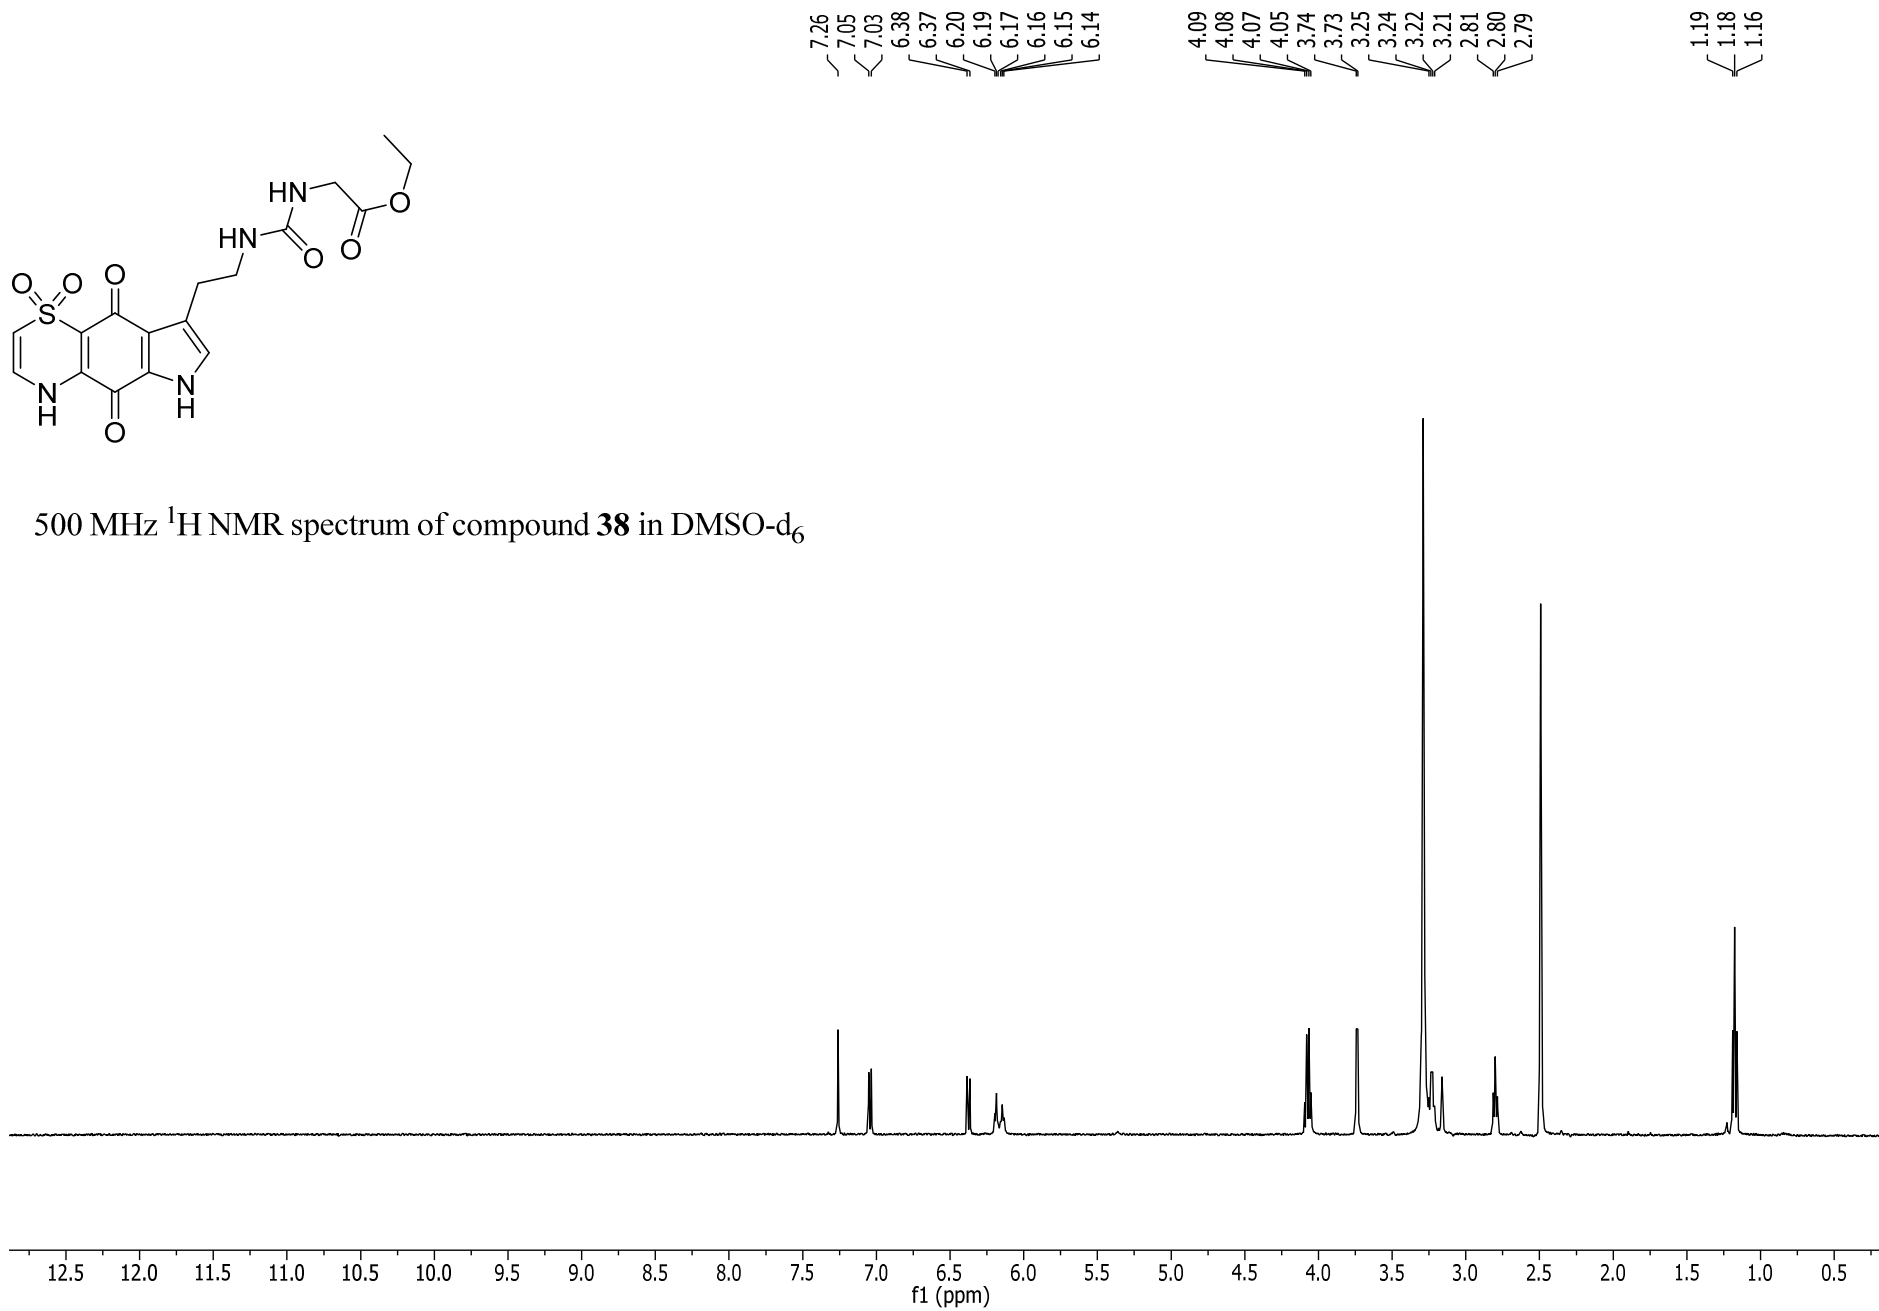

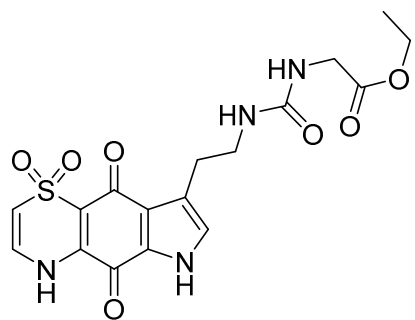

125 MHz  $^{13}\text{C}$  spectrum of compound **38** in DMSO- $\text{d}_6$

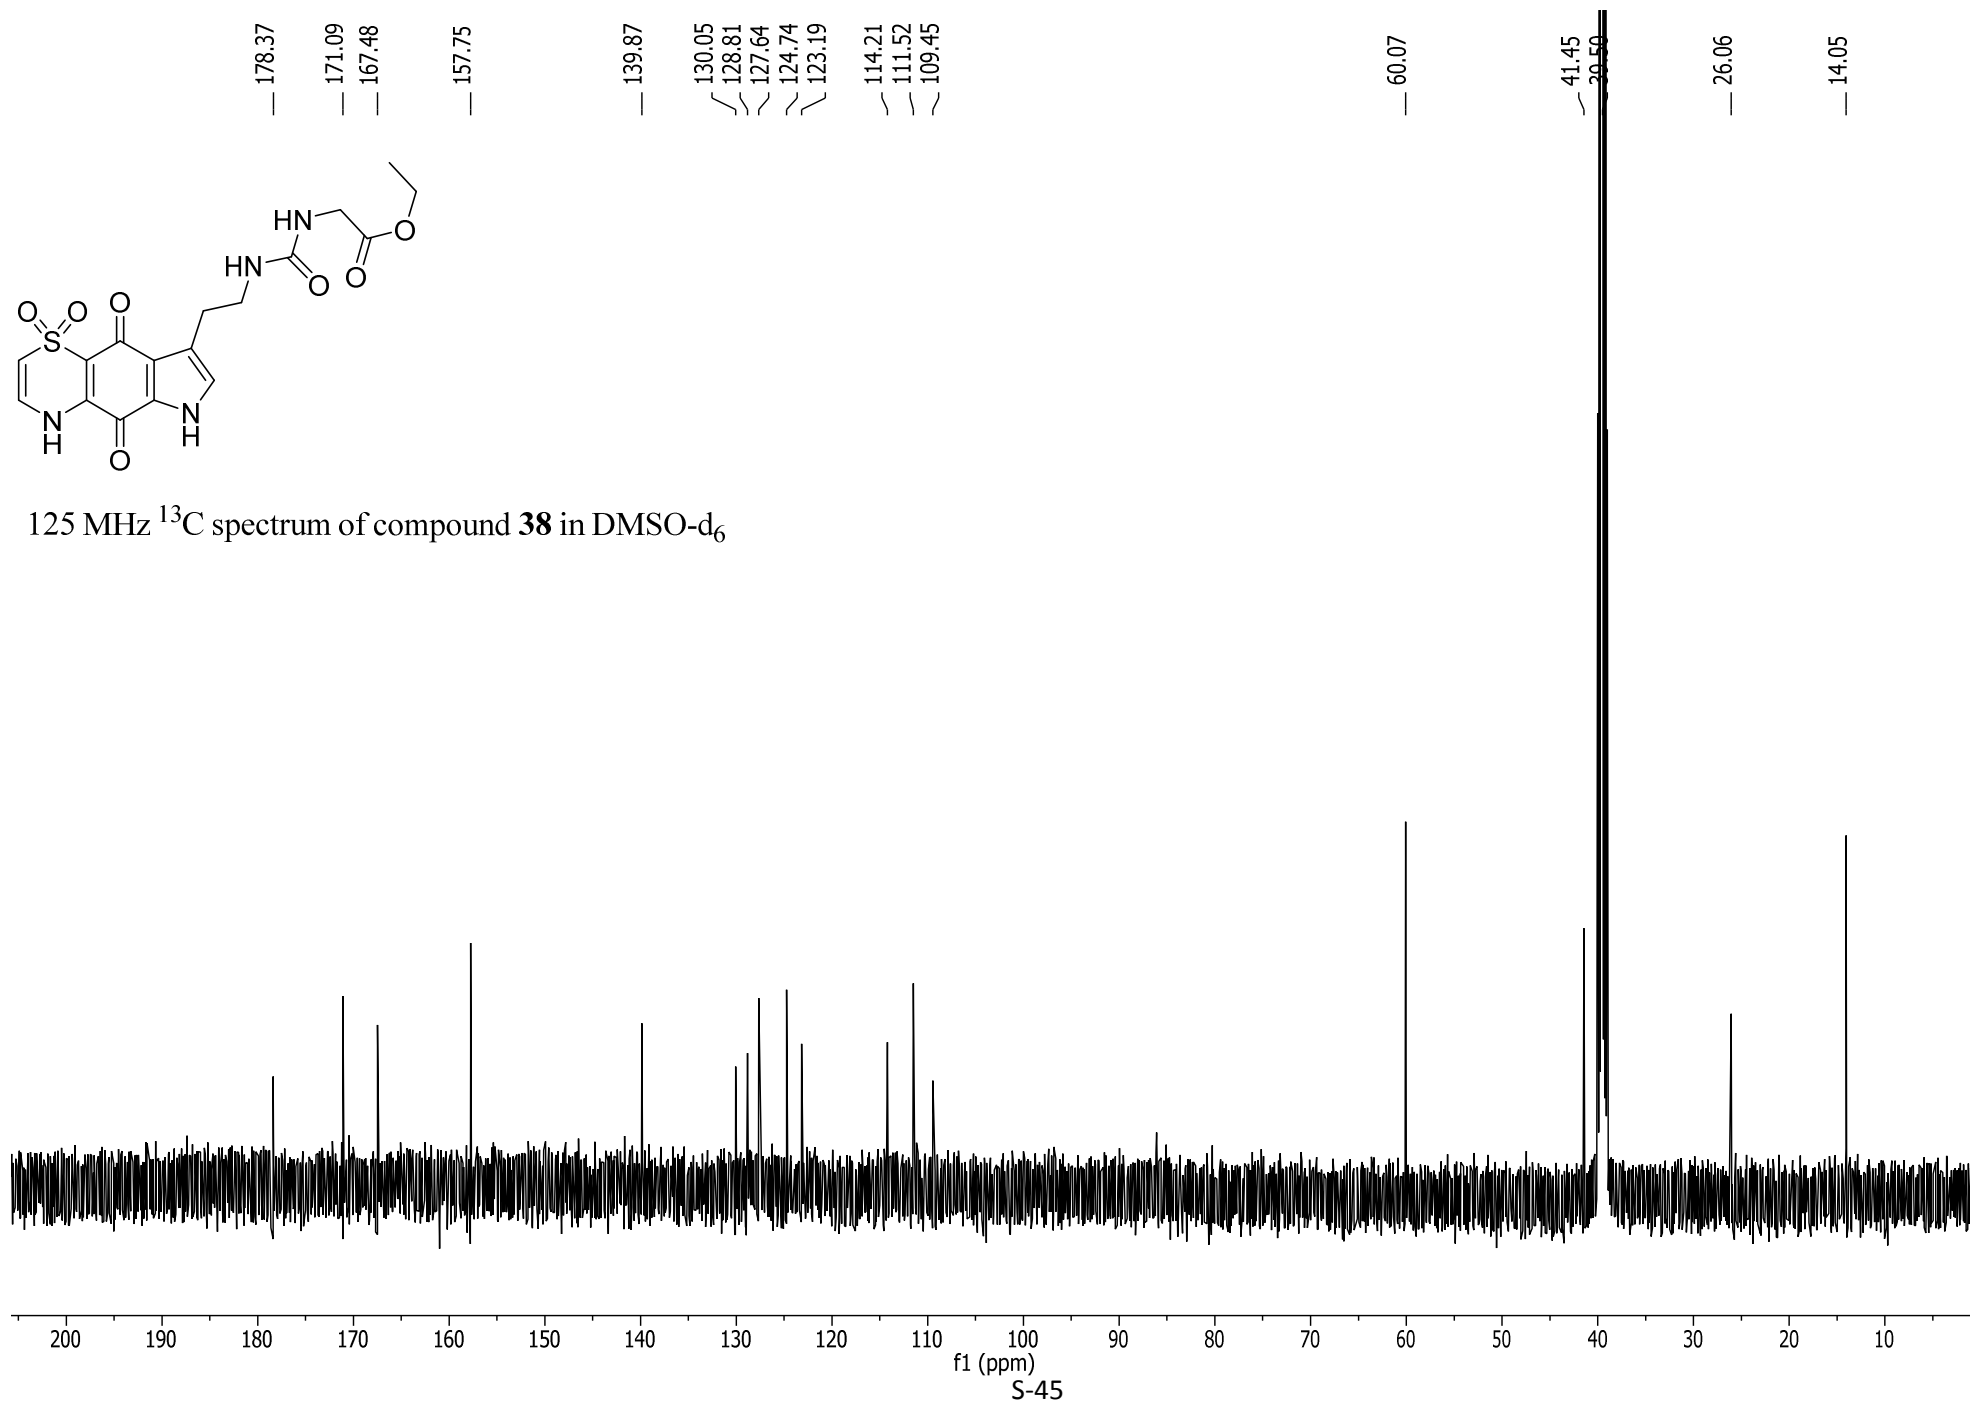

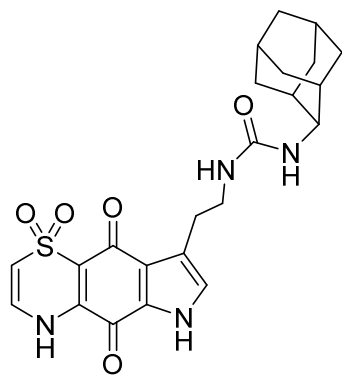

500 MHz  $^1\text{H}$  NMR spectrum of compound **39** in  $\text{DMSO-d}_6$

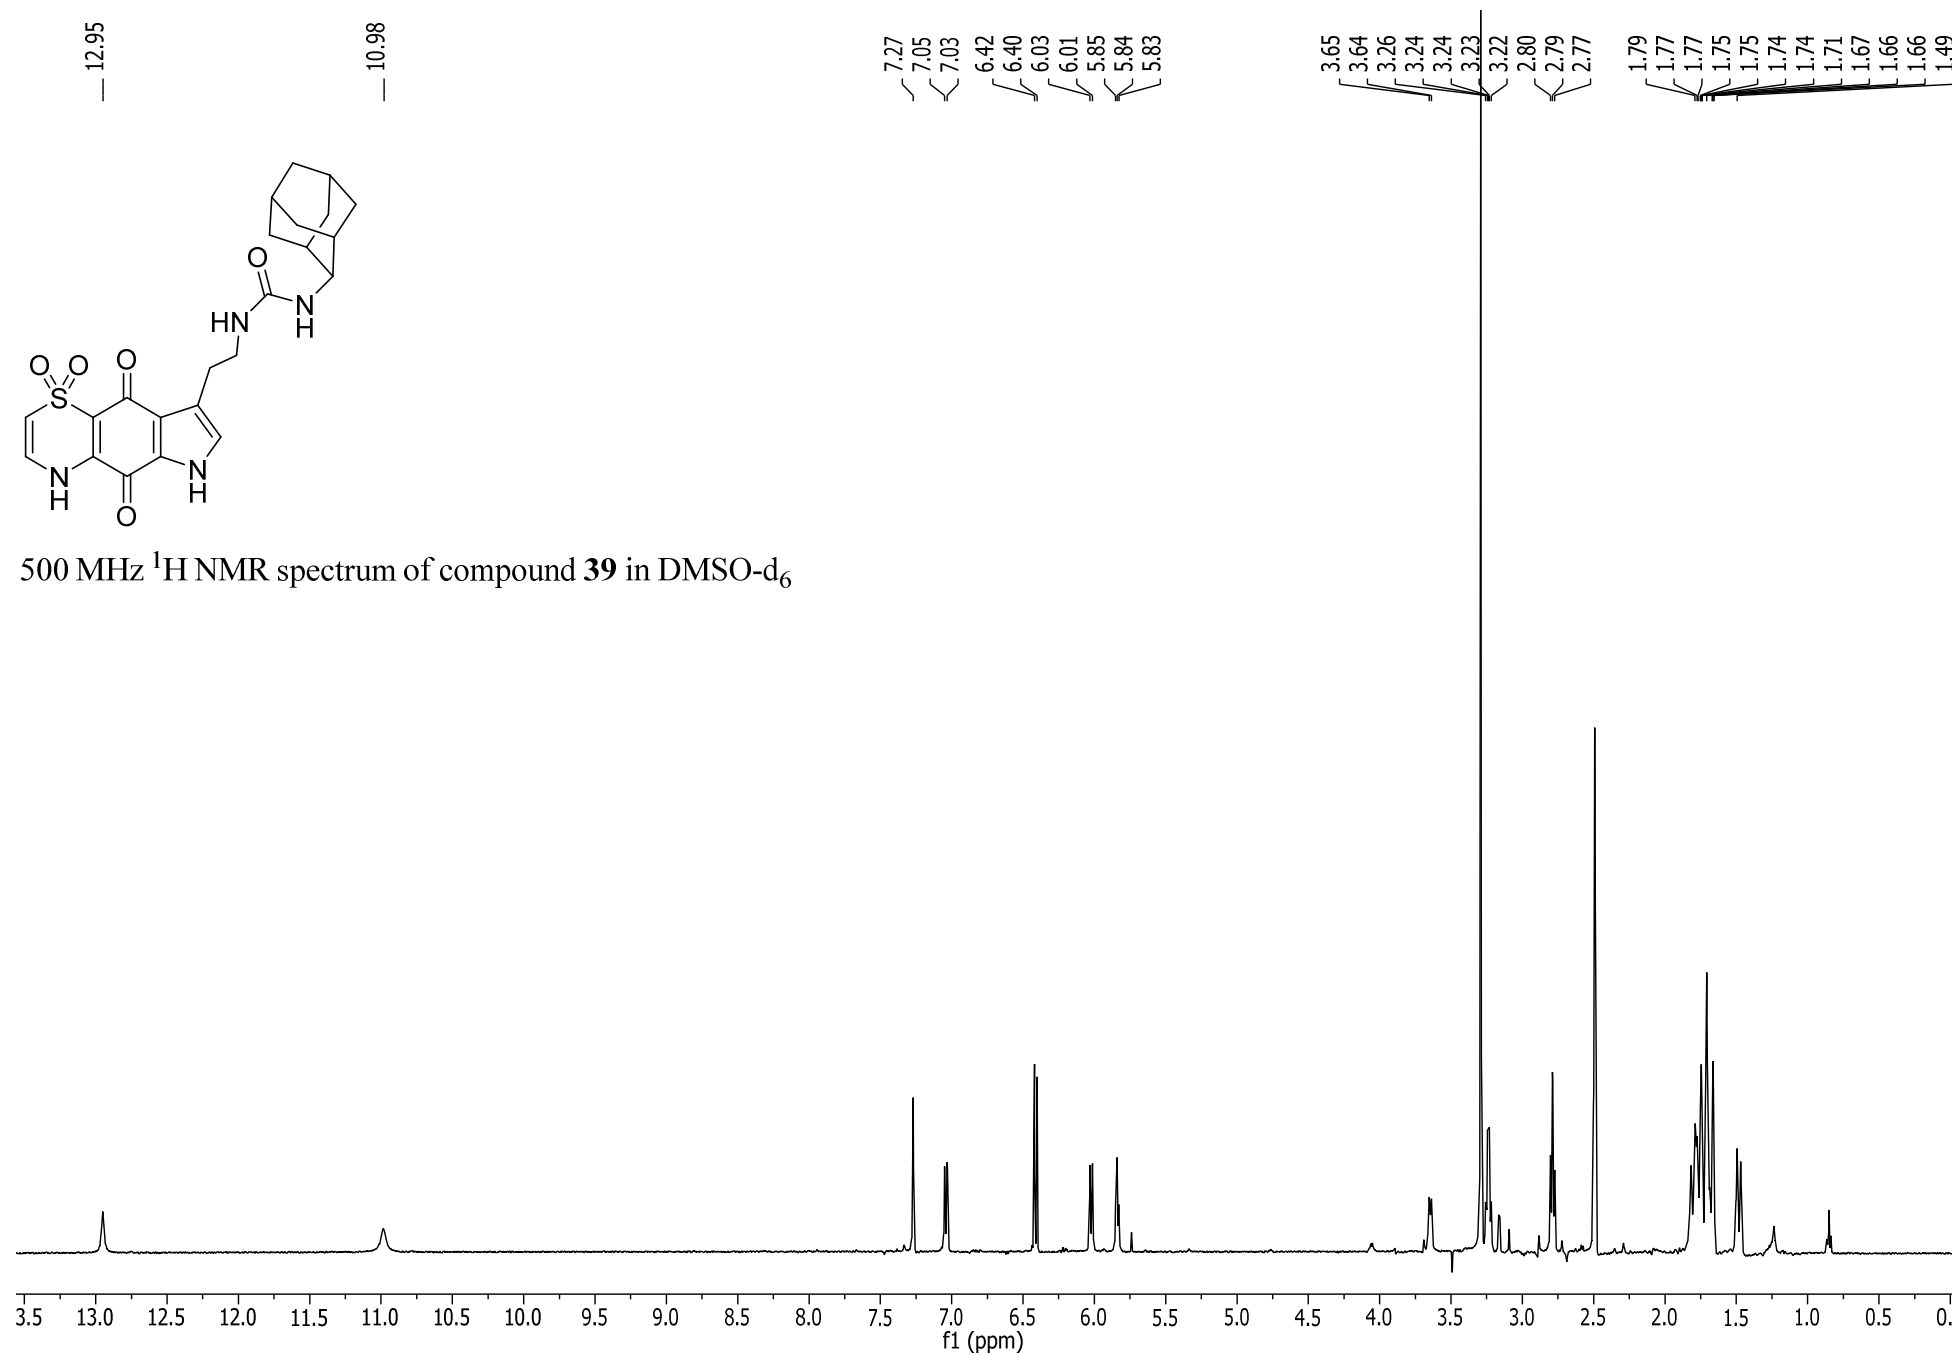

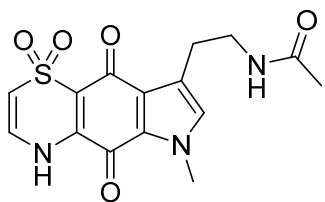

500 MHz  $^1\text{H}$  NMR spectrum of compound **40** in DMSO- $\text{d}_6$

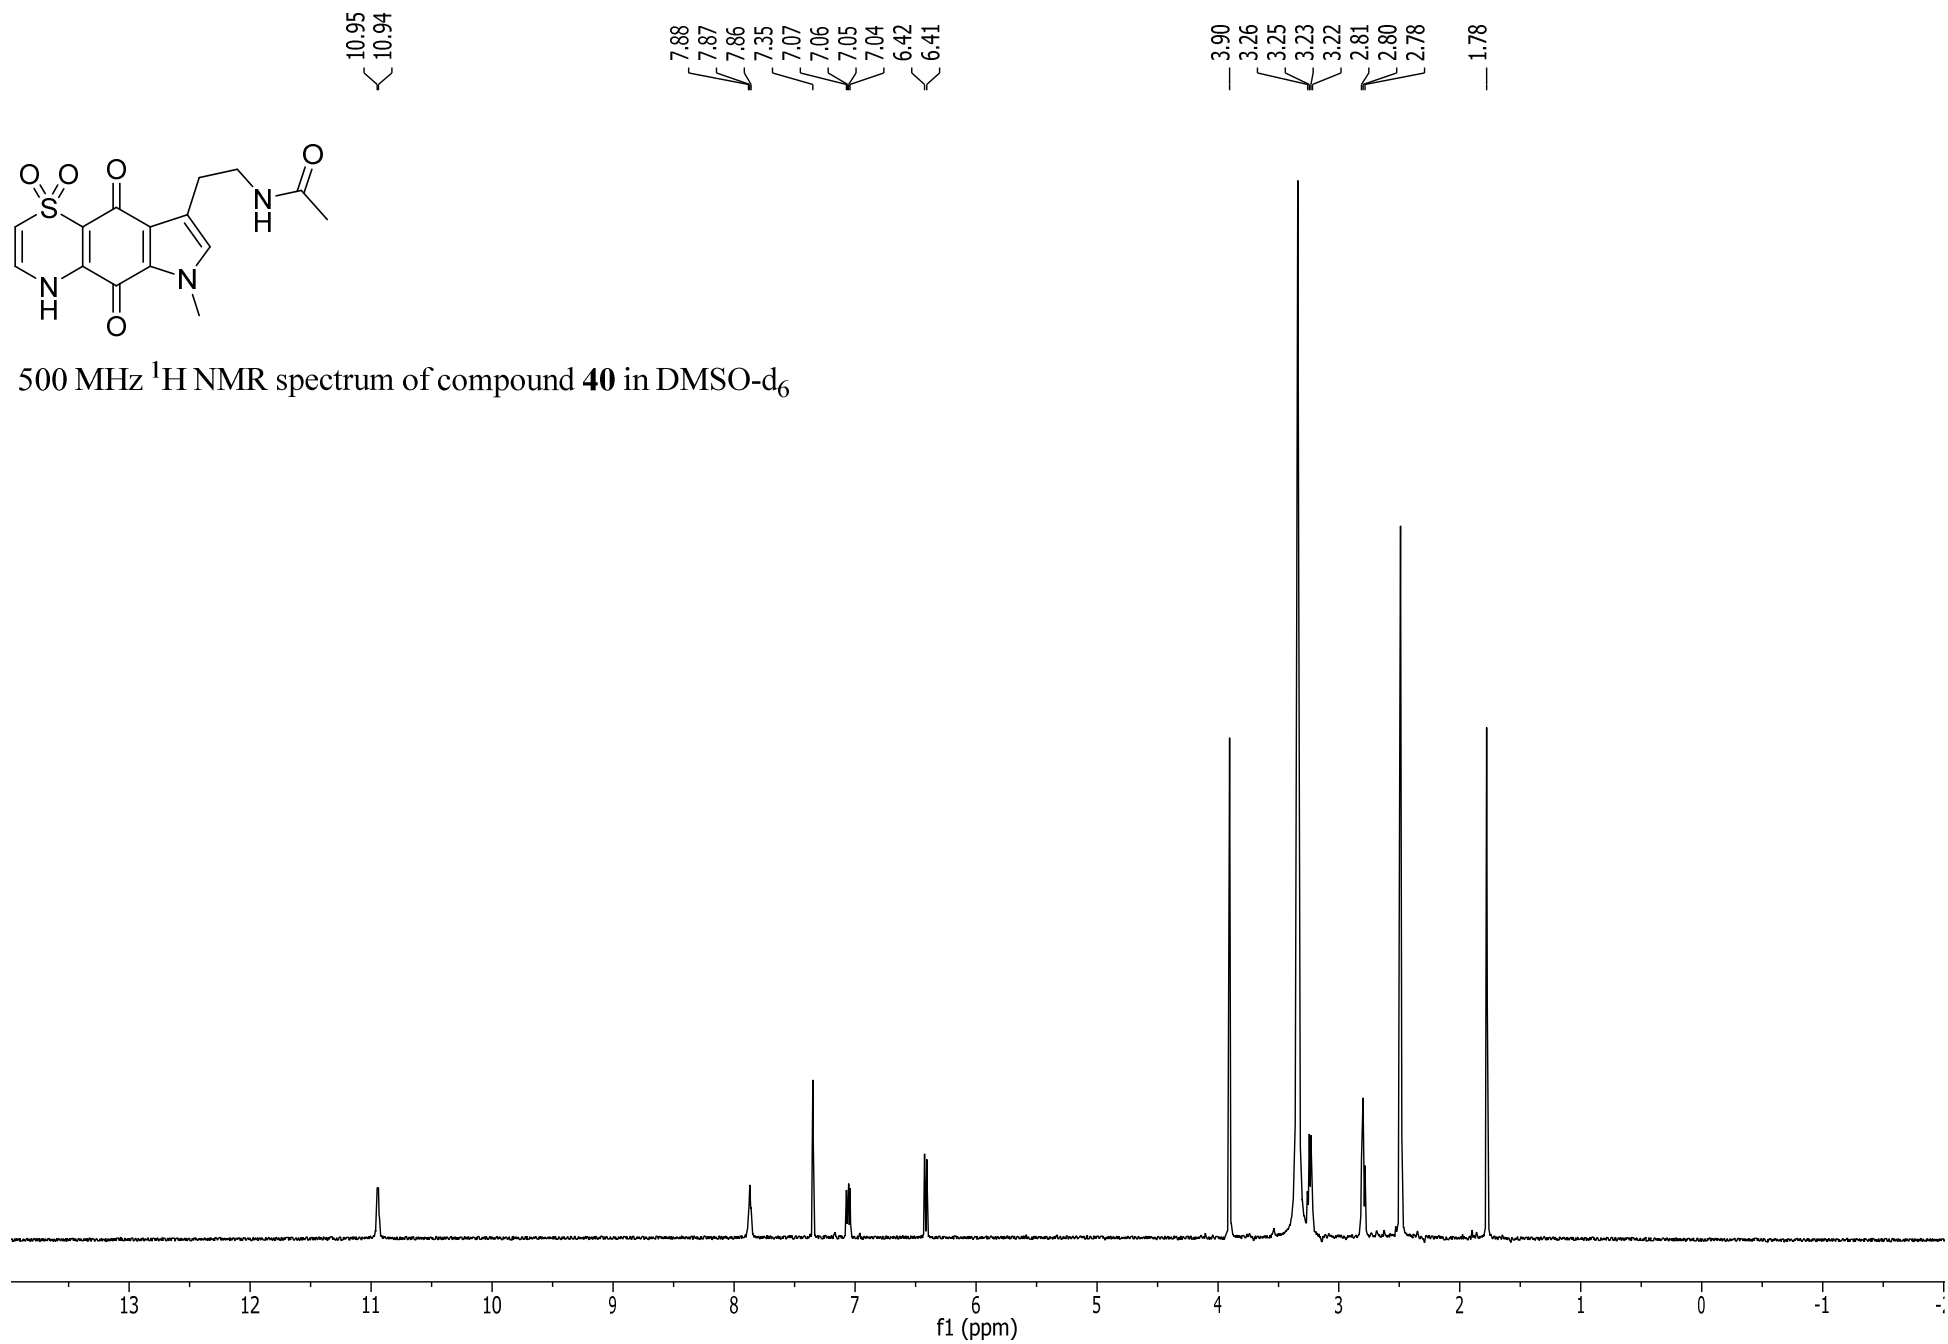

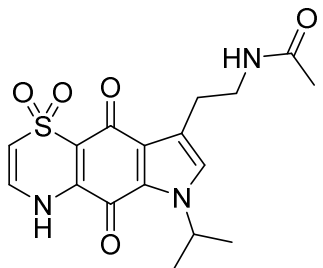

500 MHz  $^1\text{H}$  NMR spectrum of compound **41** in DMSO- $\text{d}_6$

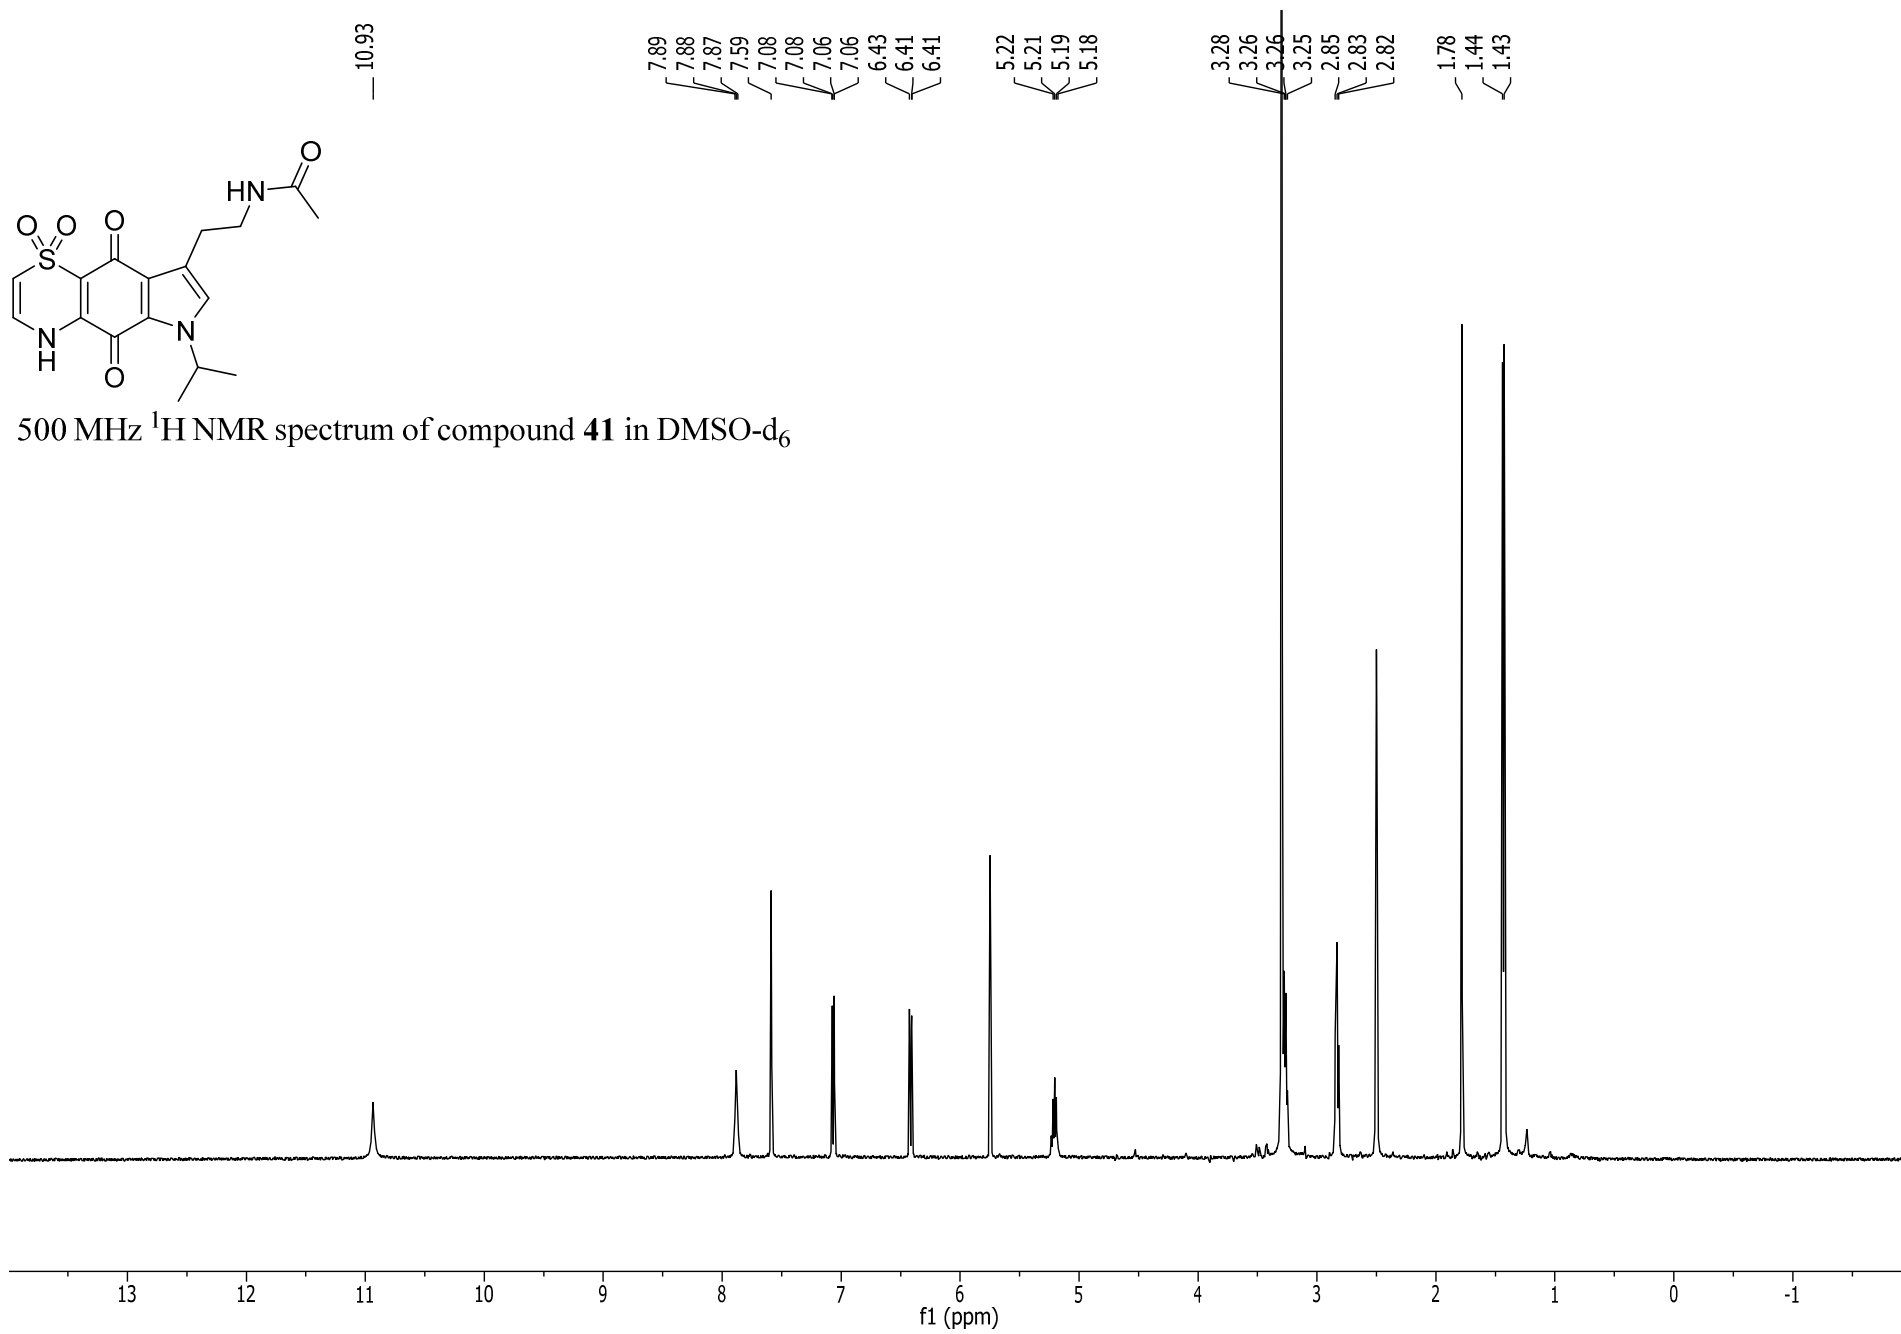



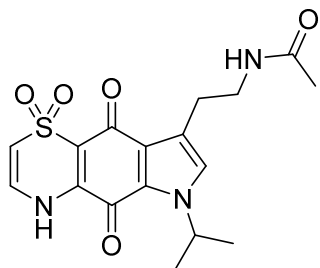

125 MHz  $^{13}\text{C}$  NMR spectrum of compound **41** in  $\text{DMSO-d}_6$

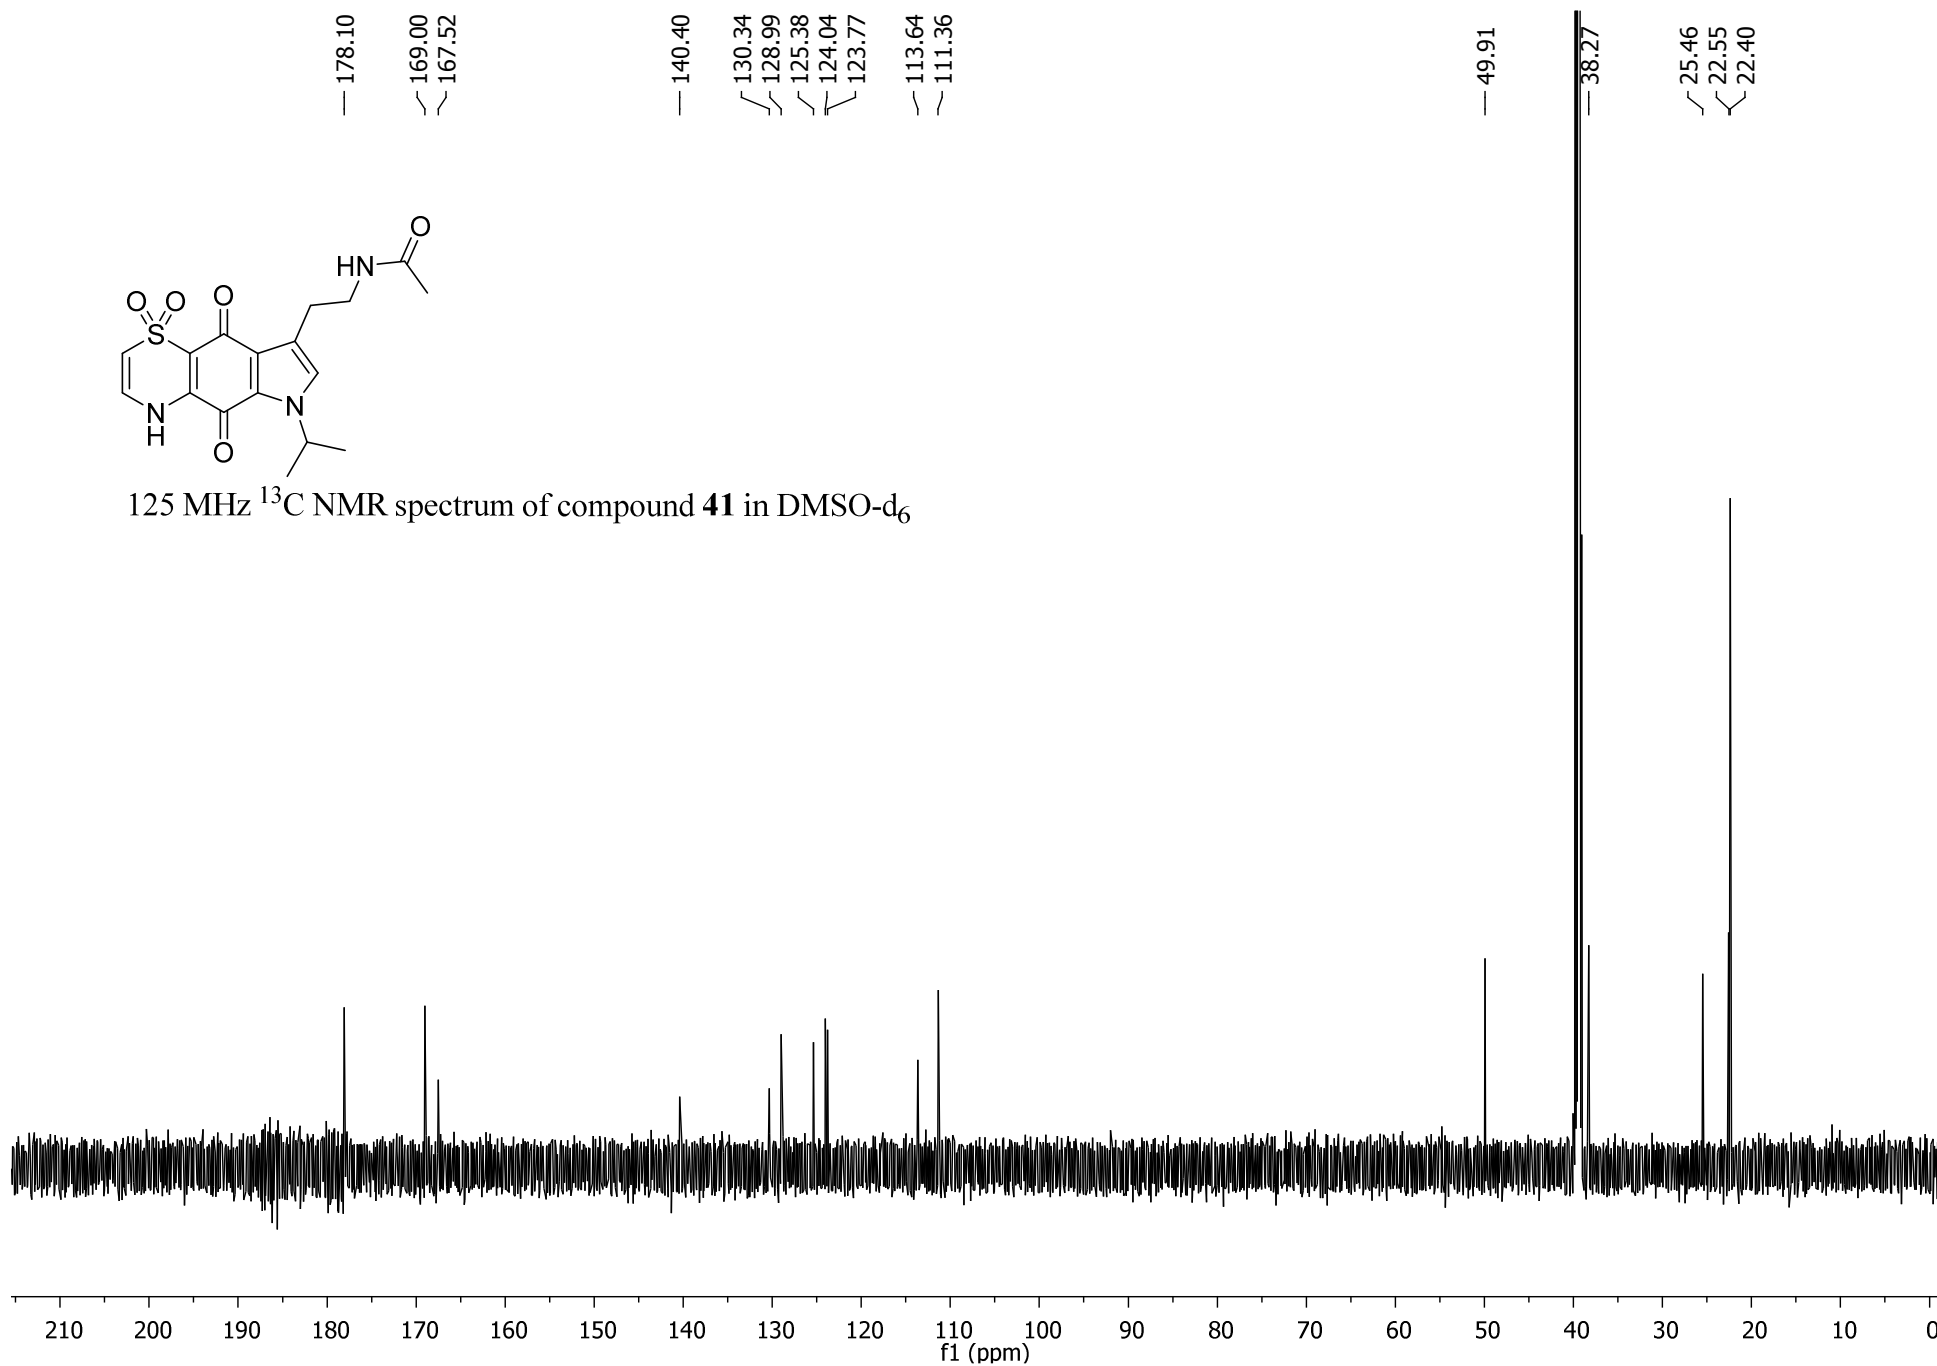

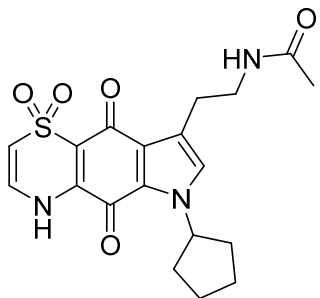

500 MHz  $^1\text{H}$  NMR spectrum of compound **42** in  $\text{DMSO-d}_6$

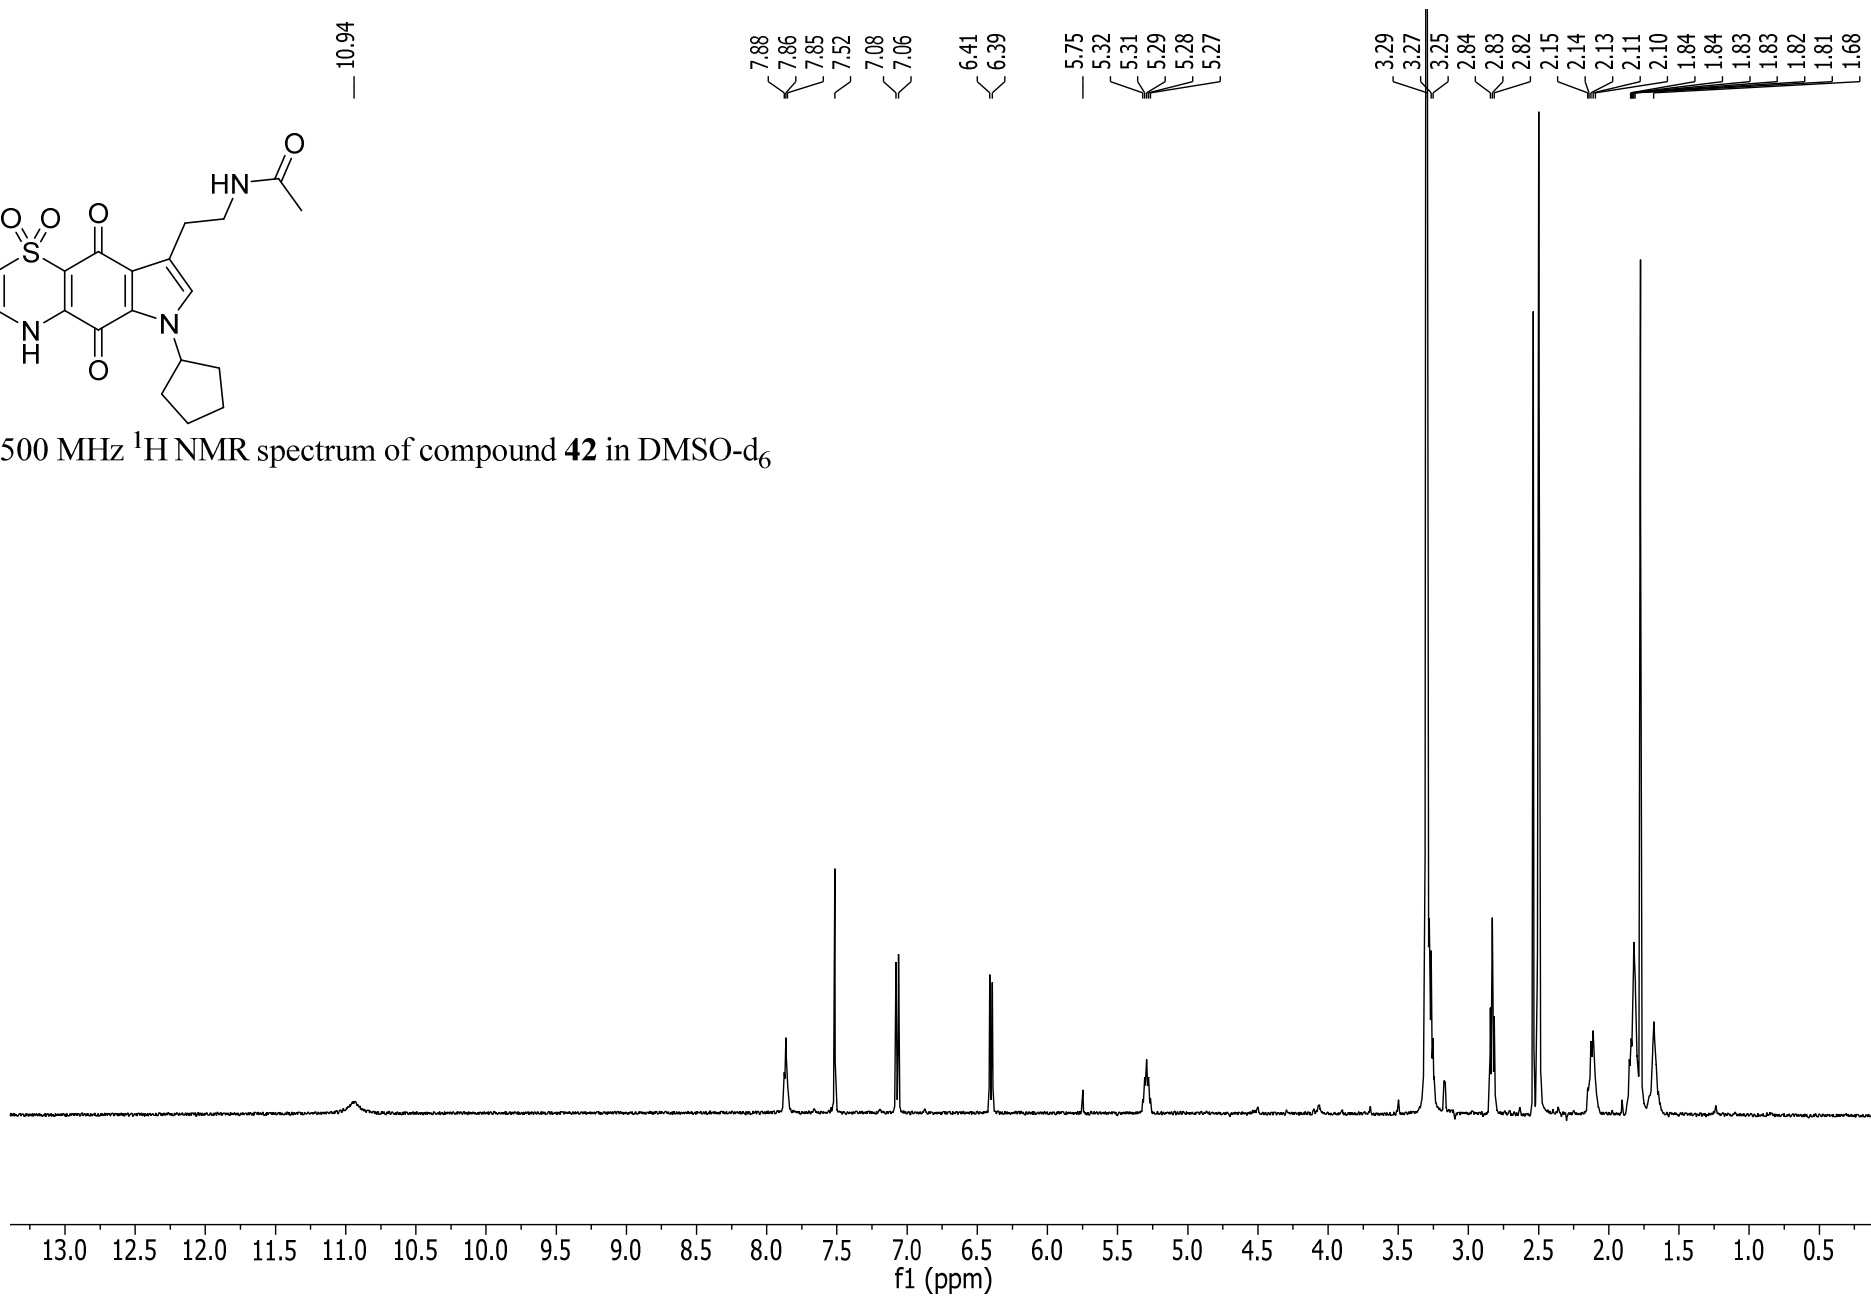

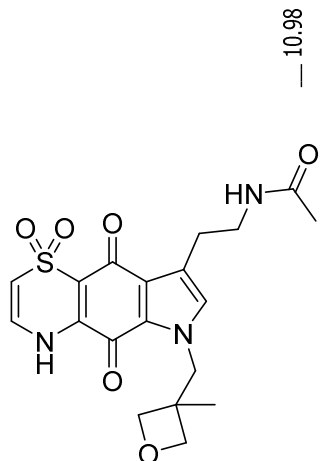

500 MHz  $^1\text{H}$  NMR spectrum of compound **43** in  $\text{DMSO-d}_6$

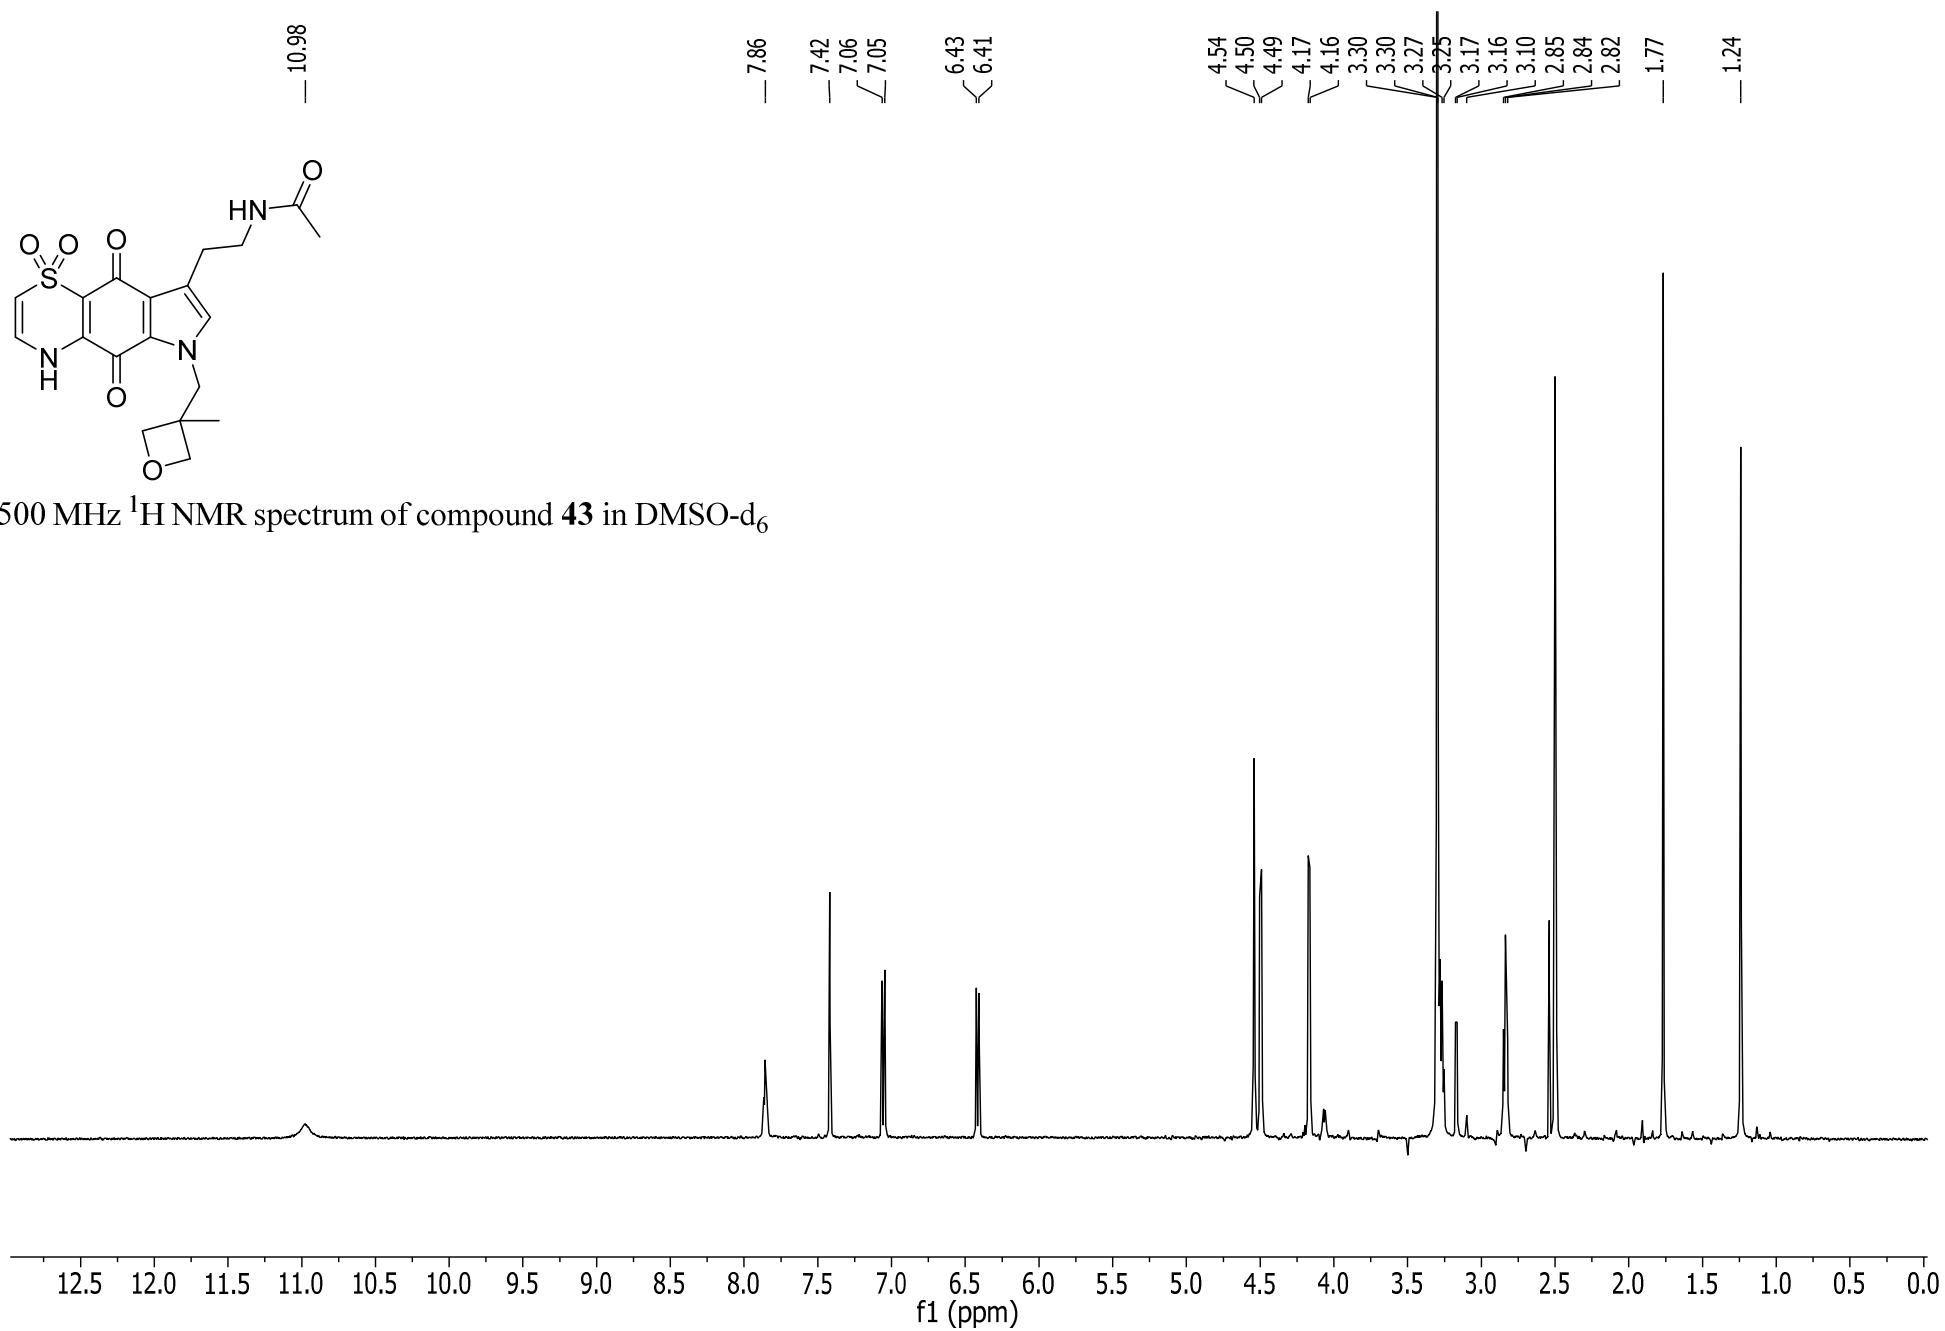

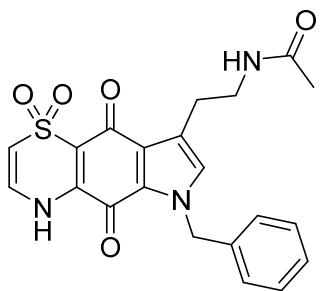

500 MHz  $^1\text{H}$  NMR spectrum of compound **44** in DMSO- $\text{d}_6$

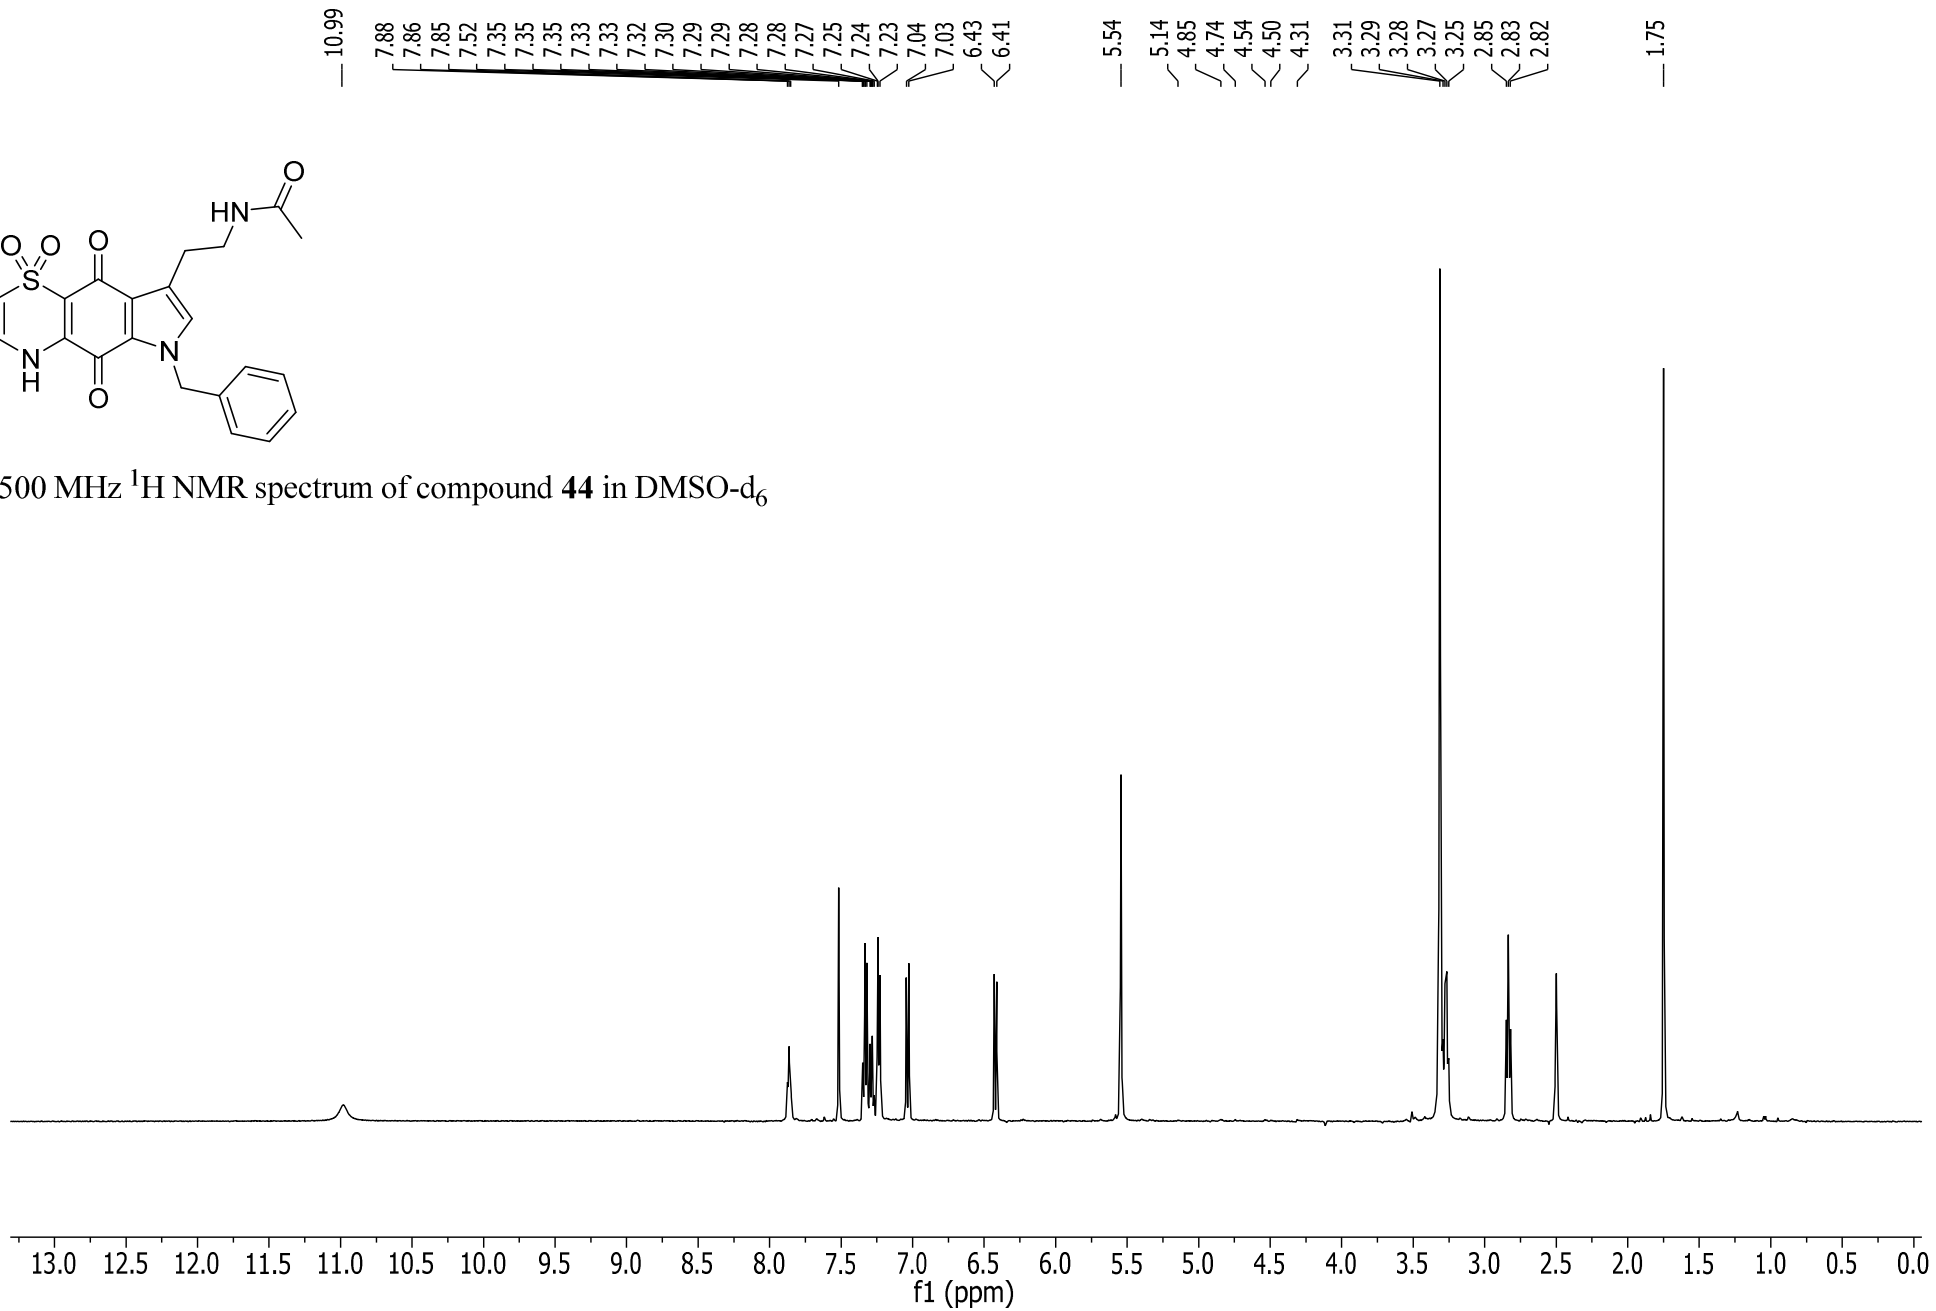

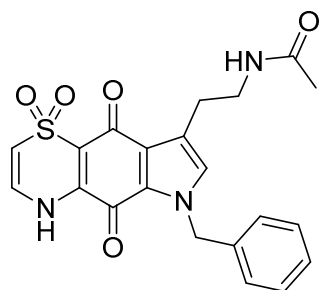

125 MHz  $^{13}\text{C}$  NMR spectrum of compound **44** in DMSO- $\text{d}_6$

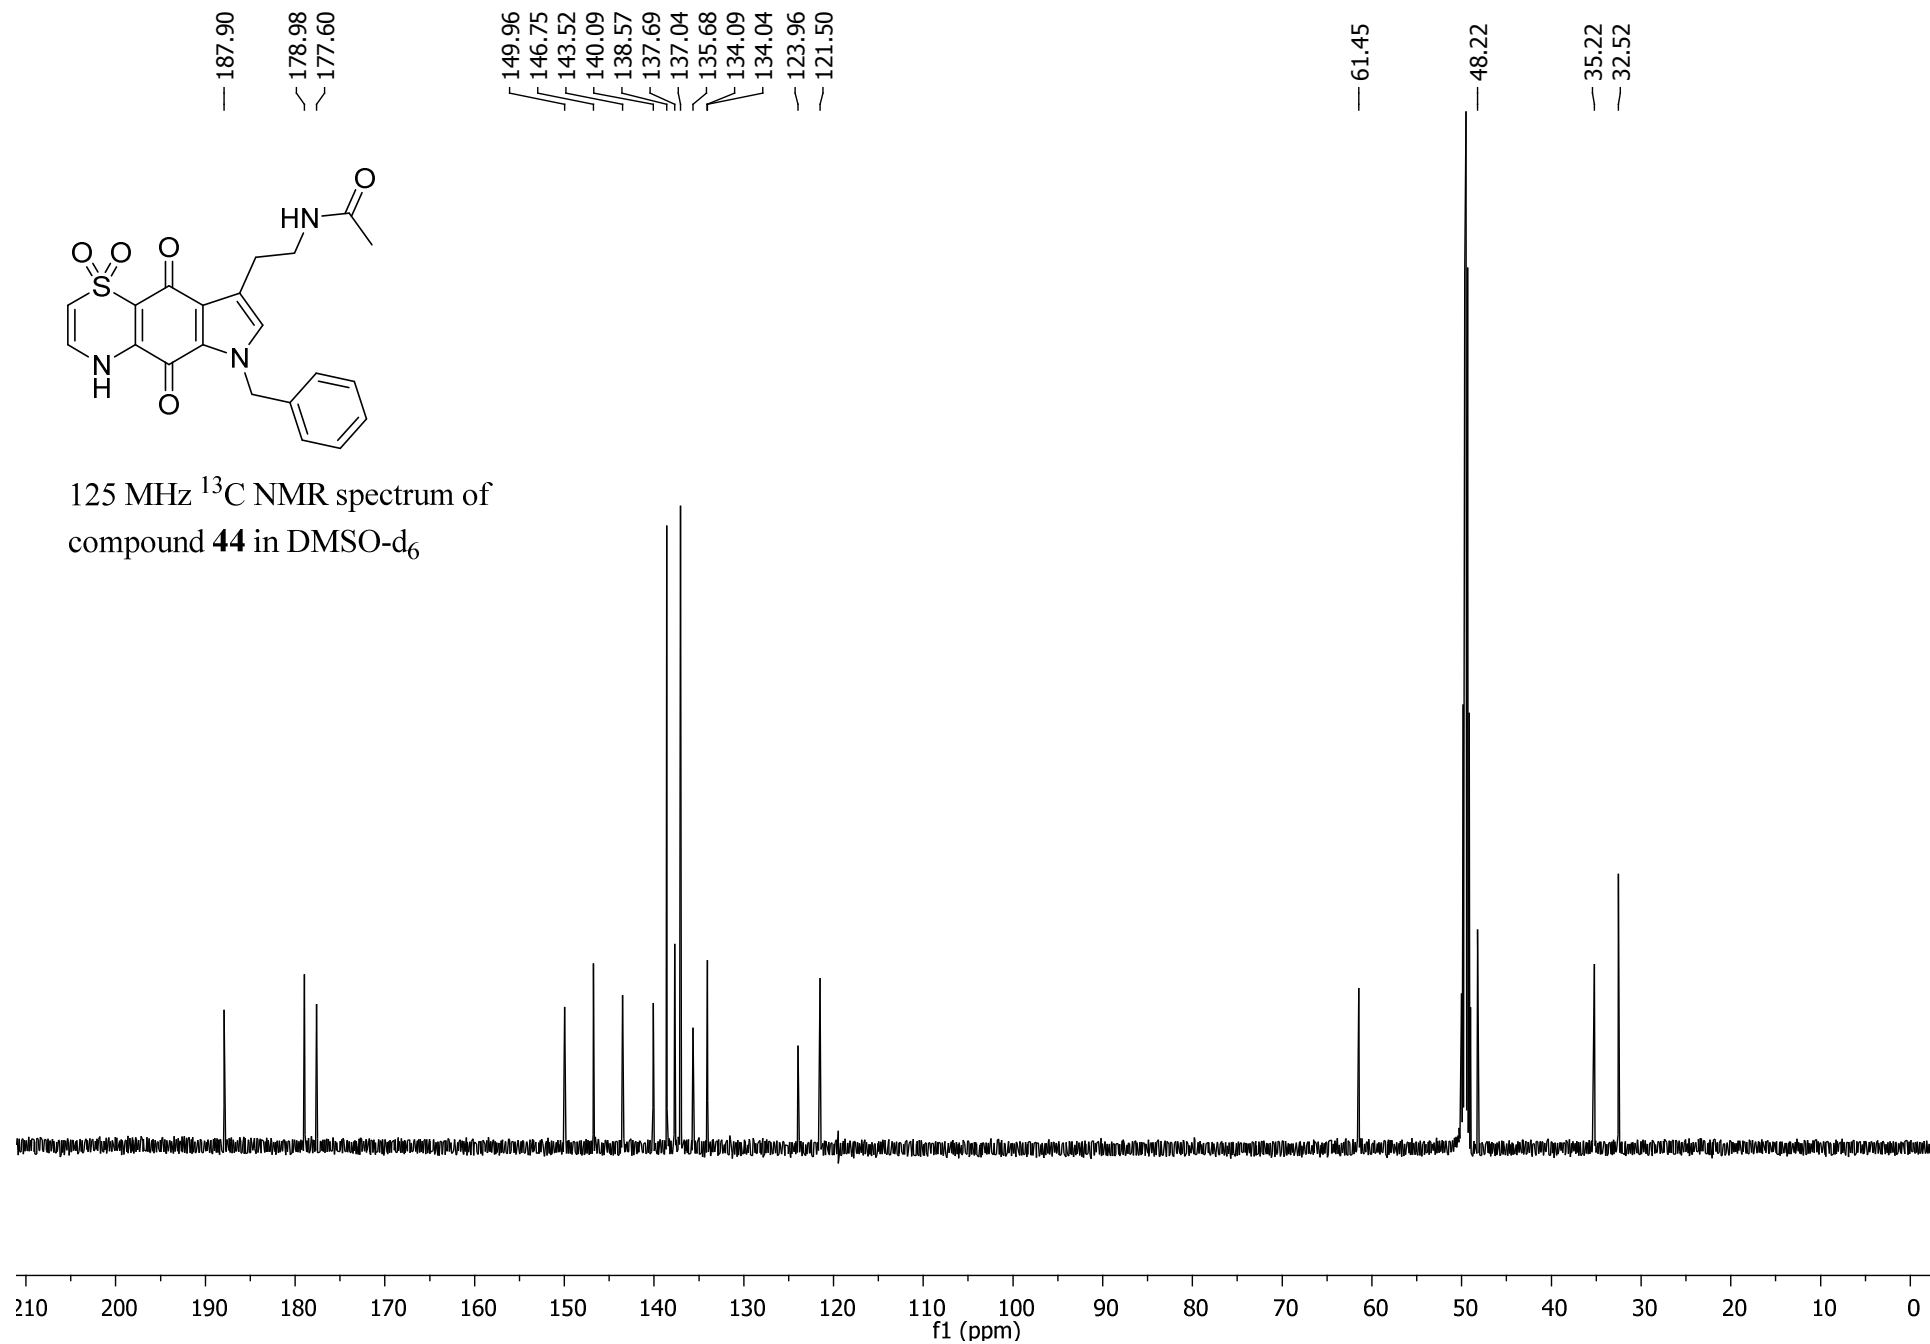

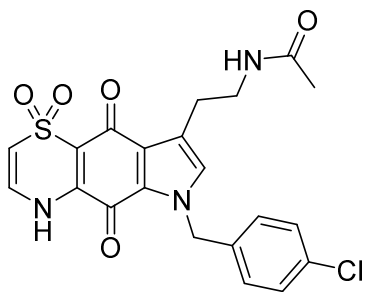

500 MHz  $^1\text{H}$  NMR spectrum of compound **45** in  $\text{DMSO-d}_6$

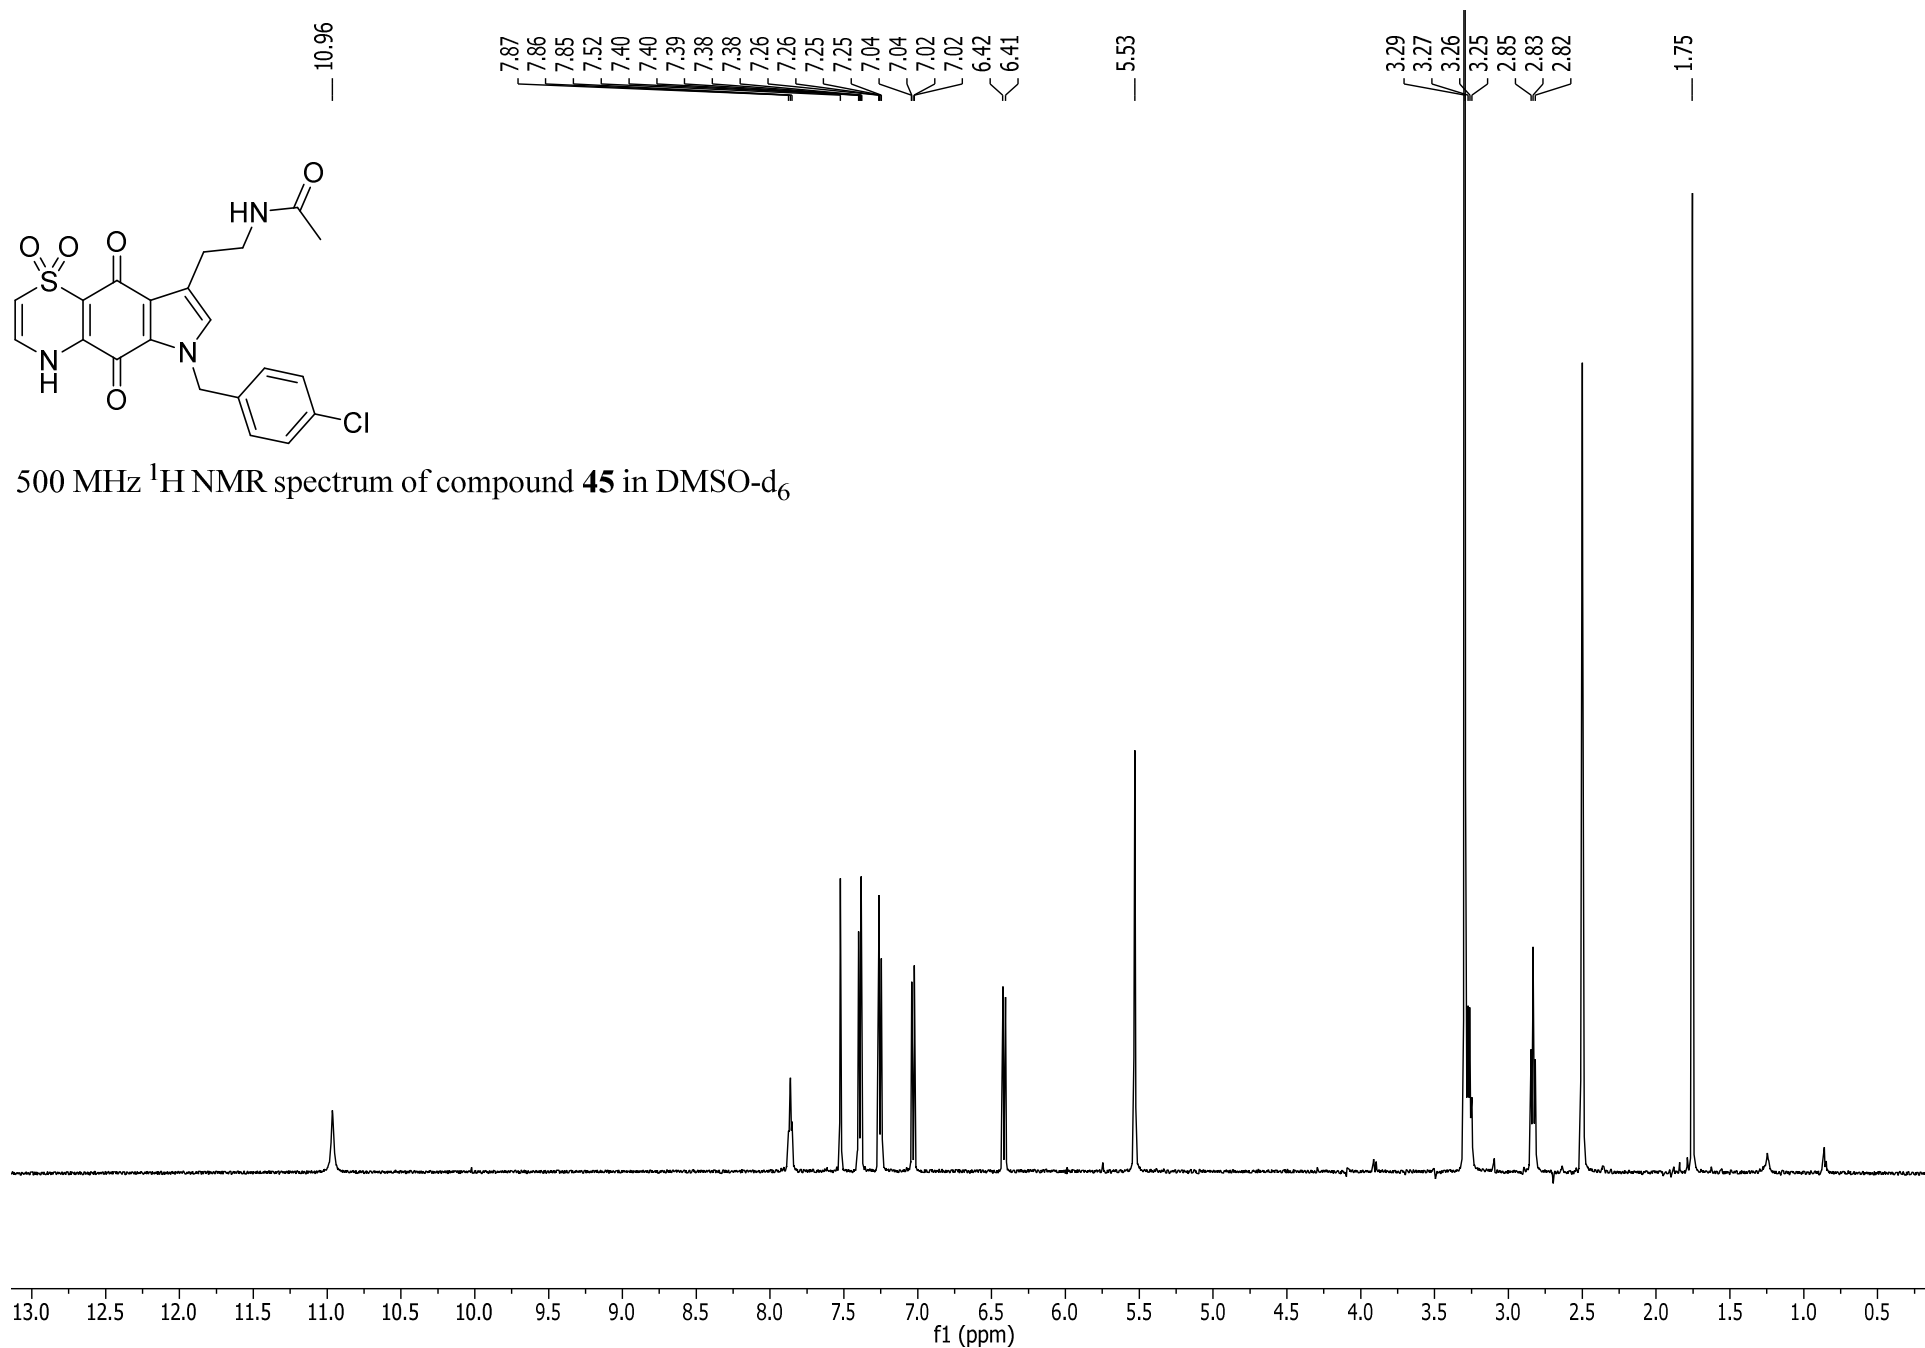

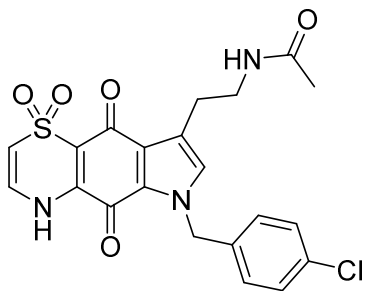

125 MHz  $^{13}\text{C}$  NMR spectrum of compound **45** in  $\text{DMSO-d}_6$

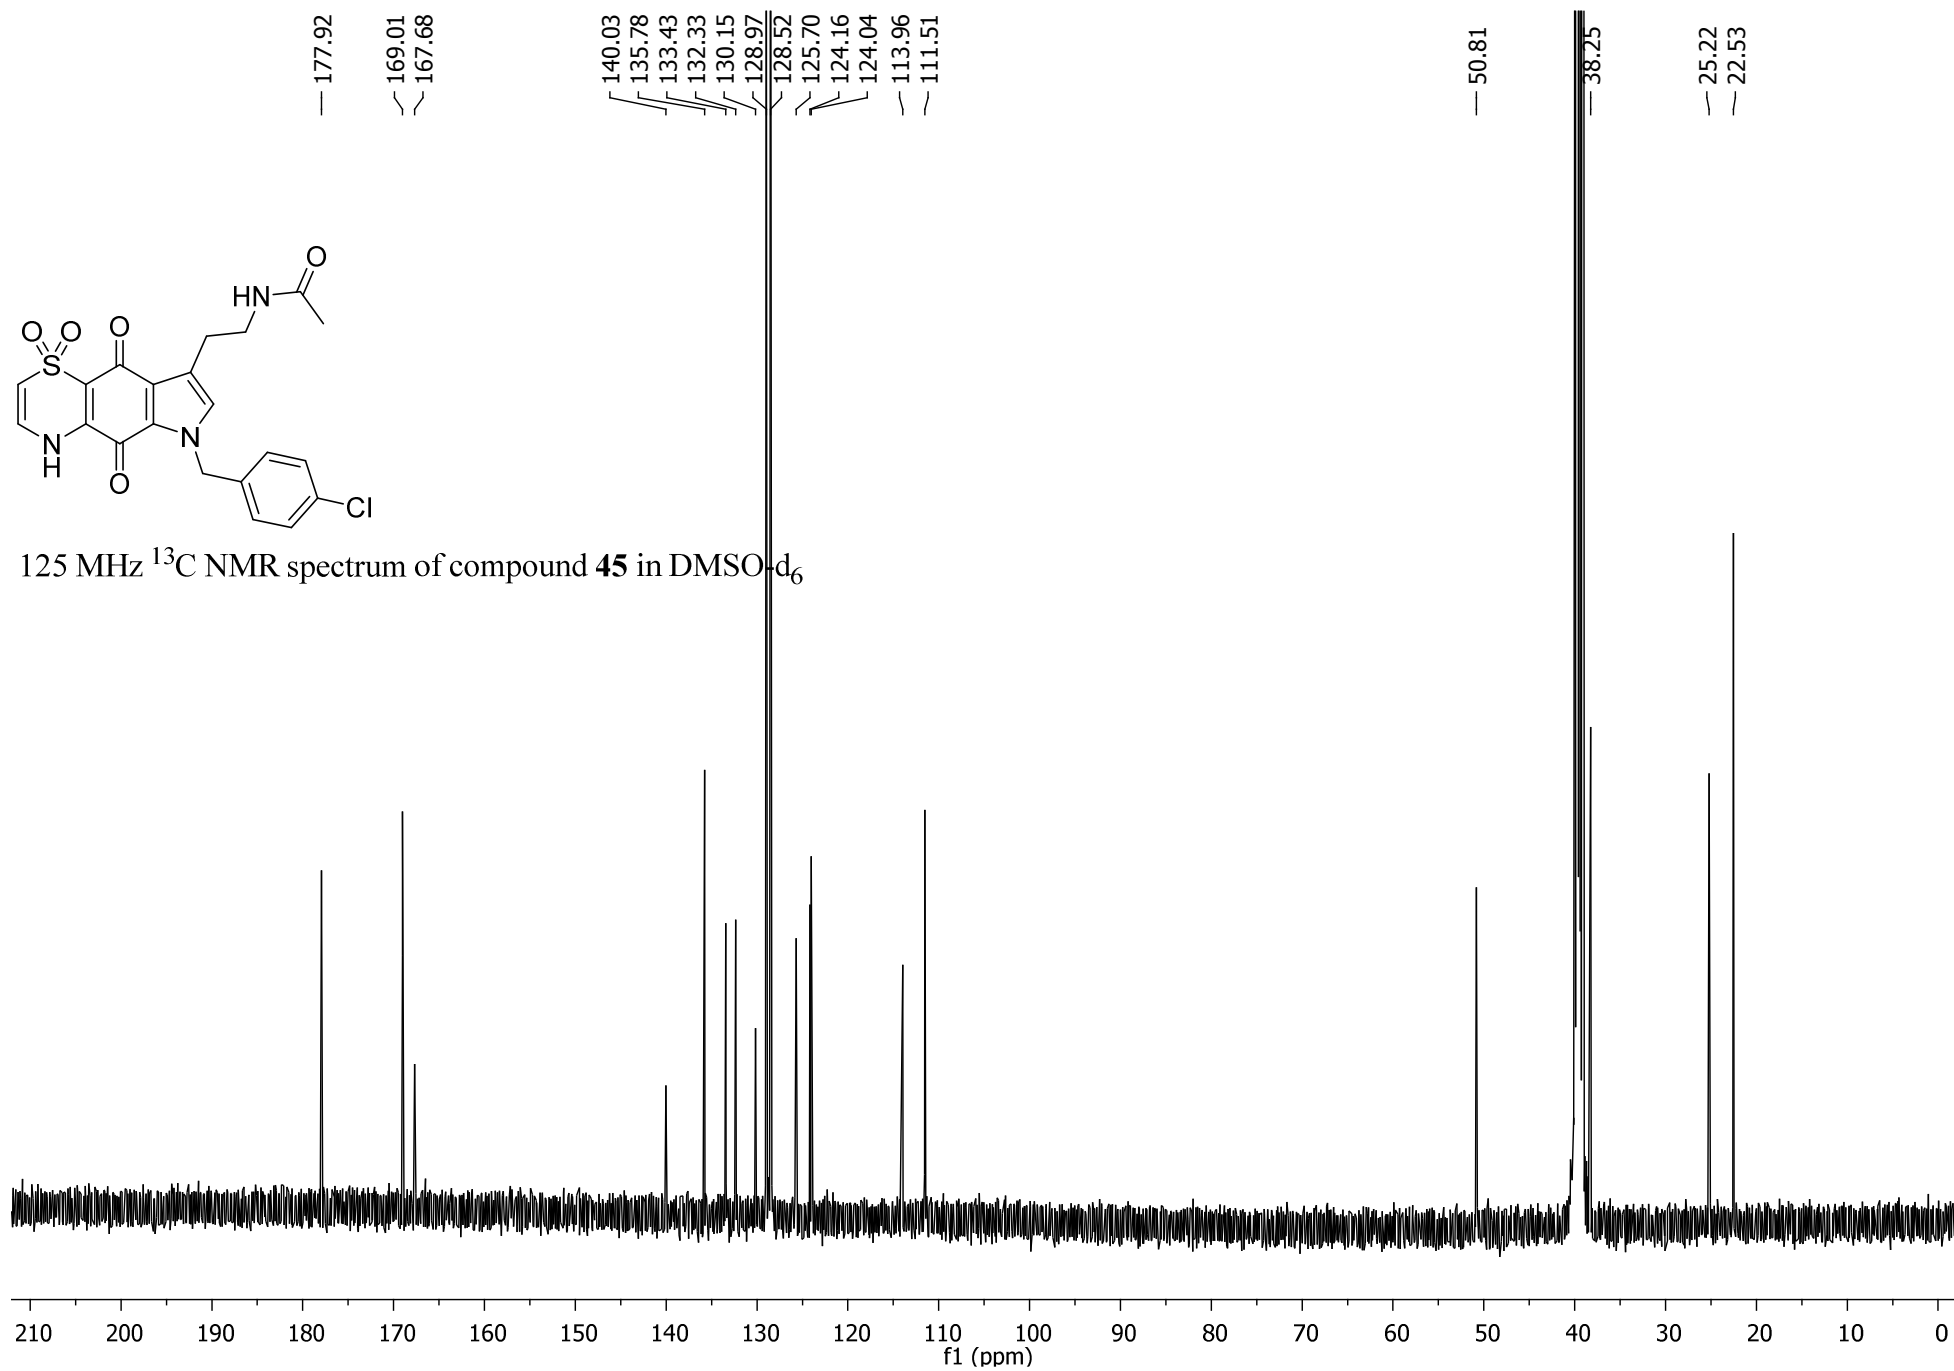

## X-ray crystallography

### Crystal data for (1)

[C<sub>12</sub>H<sub>12</sub>N<sub>3</sub>O<sub>4</sub>S]Cl·2H<sub>2</sub>O,  $M_r = 365.8$ . Orthorhombic, space group *Pbca*,  $a = 14.5655(5)$ ,  $b = 8.3351(3)$ ,  $c = 26.0998(10)$  Å,  $V = 3168.6(2)$  Å<sup>3</sup>.  $D_c$  ( $Z = 8$ ) = 1.53 g cm<sup>-3</sup>.  $\mu_{MO} = 0.41$  mm; specimen: 0.35 x 0.25 x 0.10 mm;  $T'_{\min/\max} = 0.87/0.96$ .  $2\theta_{\max} = 55.0^\circ$ ;  $N_t = 8729$ ,  $N = 2640$  ( $R_{\text{int}} = 0.031$ ),  $N_o = 2950$ ;  $R_1 = 0.052$ ,  $wR_2 = 0.1229$ ;  $S = 1.11$ .

### Crystal data for (9)

C<sub>15</sub>H<sub>15</sub>N<sub>3</sub>O<sub>5</sub>S·C<sub>2</sub>H<sub>6</sub>OS,  $M_r = 427.5$ . Monoclinic, space group *P2<sub>1</sub>/c*  $a = 10.0722(6)$ ,  $b = 24.948(2)$ ,  $c = 7.5588(5)$  Å,  $\beta = 99.053(6)$ ,  $V = 1875.7(2)(2)$  Å<sup>3</sup>.  $D_c$  ( $Z = 4$ ) = 1.51 g cm<sup>-3</sup>.  $\mu_{MO} = 0.33$  mm; specimen: 0.31 x 0.17 x 0.04 mm;  $T'_{\min/\max} = 0.91/0.99$ .  $2\theta_{\max} = 55.0^\circ$ ;  $N_t = 7560$ ,  $N = 4251$  ( $R_{\text{int}} = 0.037$ ),  $N_o = 3062$ ;  $R_1 = 0.053$ ,  $wR_2 = 0.125$ ;  $S = 1.06$ .
